# Supplementary material for: Gut microbiota–derived short-chain fatty acids protect against the progression of endometriosis
Source: Life Sci Alliance. 2021 Sep 30;4(12):e202101224. doi: 10.26508/lsa.202101224 (PMC8500332; doi:10.26508/lsa.202101224)
Supplement: Supplementary file 1 [file LSA-2021-01224_TableS1.xlsx]

## Sheet: Table S1
Table S1: List of DEGs identified by RNA sequencing with n-butyrate treatment in iHEECs/ Luc.
Feature_ID	entrezgene	external_gene_name	gene_biotype	external_gene_source	transcript_count	description	logFC	linearFC
ENSG00000126785	57381	RHOJ	protein_coding	HGNC Symbol	4	ras homolog family member J [Source:HGNC Symbol;Acc:HGNC:688]	-5.71501	-52.5277
ENSG00000141469	6563	SLC14A1	protein_coding	HGNC Symbol	20	solute carrier family 14 member 1 (Kidd blood group) [Source:HGNC Symbol;Acc:HGNC:10918]	-5.67304	-51.0219
ENSG00000164100	9348	NDST3	protein_coding	HGNC Symbol	2	N-deacetylase and N-sulfotransferase 3 [Source:HGNC Symbol;Acc:HGNC:7682]	-5.50617	-45.4487
ENSG00000168542	1281	COL3A1	protein_coding	HGNC Symbol	6	collagen type III alpha 1 chain [Source:HGNC Symbol;Acc:HGNC:2201]	-5.45435	-43.8454
ENSG00000104415	8840	CCN4	protein_coding	HGNC Symbol	5	cellular communication network factor 4 [Source:HGNC Symbol;Acc:HGNC:12769]	-5.14677	-35.4269
ENSG00000116132	5396	PRRX1	protein_coding	HGNC Symbol	8	paired related homeobox 1 [Source:HGNC Symbol;Acc:HGNC:9142]	-5.07055	-33.6037
ENSG00000176435	161198	CLEC14A	protein_coding	HGNC Symbol	1	C-type lectin domain containing 14A [Source:HGNC Symbol;Acc:HGNC:19832]	-4.93873	-30.6694
ENSG00000181072	1129	CHRM2	protein_coding	HGNC Symbol	7	cholinergic receptor muscarinic 2 [Source:HGNC Symbol;Acc:HGNC:1951]	-4.86087	-29.0582
ENSG00000271811	NA	Z97200.1	lncRNA	Clone-based (Ensembl) gene	1	novel transcript	-4.69623	-25.9243
ENSG00000176046	26471	NUPR1	protein_coding	HGNC Symbol	3	nuclear protein 1, transcriptional regulator [Source:HGNC Symbol;Acc:HGNC:29990]	-4.6702	-25.4606
ENSG00000187398	338645	LUZP2	protein_coding	HGNC Symbol	8	leucine zipper protein 2 [Source:HGNC Symbol;Acc:HGNC:23206]	-4.56318	-23.6404
ENSG00000107562	6387	CXCL12	protein_coding	HGNC Symbol	8	C-X-C motif chemokine ligand 12 [Source:HGNC Symbol;Acc:HGNC:10672]	-4.53664	-23.2094
ENSG00000268388	NA	FENDRR	lncRNA	HGNC Symbol	14	FOXF1 adjacent non-coding developmental regulatory RNA [Source:HGNC Symbol;Acc:HGNC:43894]	-4.43538	-21.6363
ENSG00000127324	7103	TSPAN8	protein_coding	HGNC Symbol	7	tetraspanin 8 [Source:HGNC Symbol;Acc:HGNC:11855]	-4.41989	-21.4052
ENSG00000132274	10346	TRIM22	protein_coding	HGNC Symbol	11	tripartite motif containing 22 [Source:HGNC Symbol;Acc:HGNC:16379]	-4.41076	-21.2701
ENSG00000166741	4837	NNMT	protein_coding	HGNC Symbol	8	nicotinamide N-methyltransferase [Source:HGNC Symbol;Acc:HGNC:7861]	-4.37828	-20.7967
ENSG00000008196	7021	TFAP2B	protein_coding	HGNC Symbol	3	transcription factor AP-2 beta [Source:HGNC Symbol;Acc:HGNC:11743]	-4.27036	-19.2977
ENSG00000221869	1052	CEBPD	protein_coding	HGNC Symbol	1	CCAAT enhancer binding protein delta [Source:HGNC Symbol;Acc:HGNC:1835]	-4.23701	-18.8567
ENSG00000171246	4884	NPTX1	protein_coding	HGNC Symbol	4	neuronal pentraxin 1 [Source:HGNC Symbol;Acc:HGNC:7952]	-4.23124	-18.7815
ENSG00000138271	53836	GPR87	protein_coding	HGNC Symbol	2	G protein-coupled receptor 87 [Source:HGNC Symbol;Acc:HGNC:4538]	-4.22442	-18.6929
ENSG00000078098	2191	FAP	protein_coding	HGNC Symbol	14	fibroblast activation protein alpha [Source:HGNC Symbol;Acc:HGNC:3590]	-4.11241	-17.2965
ENSG00000127241	5648	MASP1	protein_coding	HGNC Symbol	15	mannan binding lectin serine peptidase 1 [Source:HGNC Symbol;Acc:HGNC:6901]	-4.10486	-17.2063
ENSG00000196104	50859	SPOCK3	protein_coding	HGNC Symbol	26	SPARC (osteonectin), cwcv and kazal like domains proteoglycan 3 [Source:HGNC Symbol;Acc:HGNC:13565]	-4.10115	-17.1621
ENSG00000169174	255738	PCSK9	protein_coding	HGNC Symbol	6	proprotein convertase subtilisin/kexin type 9 [Source:HGNC Symbol;Acc:HGNC:20001]	-4.06693	-16.7598
ENSG00000275591	389610	XKR5	protein_coding	HGNC Symbol	2	XK related 5 [Source:HGNC Symbol;Acc:HGNC:20782]	-4.0616	-16.6979
ENSG00000215808	NA	LINC01139	lncRNA	HGNC Symbol	7	long intergenic non-protein coding RNA 1139 [Source:HGNC Symbol;Acc:HGNC:27924]	-4.02364	-16.2643
ENSG00000106560	26157	GIMAP2	protein_coding	HGNC Symbol	3	GTPase, IMAP family member 2 [Source:HGNC Symbol;Acc:HGNC:21789]	-4.0093	-16.1035
ENSG00000137959	10964	IFI44L	protein_coding	HGNC Symbol	10	interferon induced protein 44 like [Source:HGNC Symbol;Acc:HGNC:17817]	-4.00675	-16.075
ENSG00000213089	NA	PDCL3P5	processed_pseudogene	HGNC Symbol	1	PDCL3 pseudogene 5 [Source:HGNC Symbol;Acc:HGNC:44506]	-3.96743	-15.6428
ENSG00000174348	127435	PODN	protein_coding	HGNC Symbol	9	podocan [Source:HGNC Symbol;Acc:HGNC:23174]	-3.95361	-15.4937
ENSG00000133466	114904	C1QTNF6	protein_coding	HGNC Symbol	7	C1q and TNF related 6 [Source:HGNC Symbol;Acc:HGNC:14343]	-3.95283	-15.4854
ENSG00000163071	132671	SPATA18	protein_coding	HGNC Symbol	10	spermatogenesis associated 18 [Source:HGNC Symbol;Acc:HGNC:29579]	-3.85998	-14.5201
ENSG00000079257	56925	LXN	protein_coding	HGNC Symbol	2	latexin [Source:HGNC Symbol;Acc:HGNC:13347]	-3.82738	-14.1957
ENSG00000158270	81035	COLEC12	protein_coding	HGNC Symbol	3	collectin subfamily member 12 [Source:HGNC Symbol;Acc:HGNC:16016]	-3.7779	-13.717
ENSG00000108381	443	ASPA	protein_coding	HGNC Symbol	4	aspartoacylase [Source:HGNC Symbol;Acc:HGNC:756]	-3.7672	-13.6157
ENSG00000118004	78989	COLEC11	protein_coding	HGNC Symbol	13	collectin subfamily member 11 [Source:HGNC Symbol;Acc:HGNC:17213]	-3.71163	-13.1012
ENSG00000162849	55083	KIF26B	protein_coding	HGNC Symbol	4	kinesin family member 26B [Source:HGNC Symbol;Acc:HGNC:25484]	-3.70823	-13.0704
ENSG00000179046	205860	TRIML2	protein_coding	HGNC Symbol	7	tripartite motif family like 2 [Source:HGNC Symbol;Acc:HGNC:26378]	-3.69508	-12.9518
ENSG00000185261	285600	KIAA0825	protein_coding	HGNC Symbol	3	KIAA0825 [Source:HGNC Symbol;Acc:HGNC:28532]	-3.67001	-12.7286
ENSG00000203666	84288	EFCAB2	protein_coding	HGNC Symbol	16	EF-hand calcium binding domain 2 [Source:HGNC Symbol;Acc:HGNC:28166]	-3.65031	-12.5561
ENSG00000136542	11227	GALNT5	protein_coding	HGNC Symbol	3	polypeptide N-acetylgalactosaminyltransferase 5 [Source:HGNC Symbol;Acc:HGNC:4127]	-3.64516	-12.5113
ENSG00000185885	8519	IFITM1	protein_coding	HGNC Symbol	4	interferon induced transmembrane protein 1 [Source:HGNC Symbol;Acc:HGNC:5412]	-3.64082	-12.4737
ENSG00000173198	10800	CYSLTR1	protein_coding	HGNC Symbol	3	cysteinyl leukotriene receptor 1 [Source:HGNC Symbol;Acc:HGNC:17451]	-3.61114	-12.2197
ENSG00000140285	2252	FGF7	protein_coding	HGNC Symbol	6	fibroblast growth factor 7 [Source:HGNC Symbol;Acc:HGNC:3685]	-3.59815	-12.1102
ENSG00000182179	7318	UBA7	protein_coding	HGNC Symbol	11	ubiquitin like modifier activating enzyme 7 [Source:HGNC Symbol;Acc:HGNC:12471]	-3.58766	-12.0224
ENSG00000196517	6536	SLC6A9	protein_coding	HGNC Symbol	12	solute carrier family 6 member 9 [Source:HGNC Symbol;Acc:HGNC:11056]	-3.58229	-11.9778
ENSG00000118849	5918	RARRES1	protein_coding	HGNC Symbol	5	retinoic acid receptor responder 1 [Source:HGNC Symbol;Acc:HGNC:9867]	-3.57354	-11.9054
ENSG00000139874	6751	SSTR1	protein_coding	HGNC Symbol	1	somatostatin receptor 1 [Source:HGNC Symbol;Acc:HGNC:11330]	-3.55851	-11.7819
ENSG00000101825	25878	MXRA5	protein_coding	HGNC Symbol	1	matrix remodeling associated 5 [Source:HGNC Symbol;Acc:HGNC:7539]	-3.55351	-11.7412
ENSG00000144452	26154	ABCA12	protein_coding	HGNC Symbol	3	ATP binding cassette subfamily A member 12 [Source:HGNC Symbol;Acc:HGNC:14637]	-3.54968	-11.7101
ENSG00000132530	54739	XAF1	protein_coding	HGNC Symbol	19	XIAP associated factor 1 [Source:HGNC Symbol;Acc:HGNC:30932]	-3.53053	-11.5557
ENSG00000211448	1734	DIO2	protein_coding	HGNC Symbol	11	iodothyronine deiodinase 2 [Source:HGNC Symbol;Acc:HGNC:2884]	-3.51941	-11.467
ENSG00000134824	9415	FADS2	protein_coding	HGNC Symbol	15	fatty acid desaturase 2 [Source:HGNC Symbol;Acc:HGNC:3575]	-3.51795	-11.4554
ENSG00000149257	871	SERPINH1	protein_coding	HGNC Symbol	16	serpin family H member 1 [Source:HGNC Symbol;Acc:HGNC:1546]	-3.51234	-11.4109
ENSG00000235649	NA	MXRA5Y	unprocessed_pseudogene	HGNC Symbol	1	matrix remodeling associated 5 Y-linked (pseudogene) [Source:HGNC Symbol;Acc:HGNC:23932]	-3.50073	-11.3195
ENSG00000164692	1278	COL1A2	protein_coding	HGNC Symbol	13	collagen type I alpha 2 chain [Source:HGNC Symbol;Acc:HGNC:2198]	-3.49909	-11.3066
ENSG00000162676	2672	GFI1	protein_coding	HGNC Symbol	4	growth factor independent 1 transcriptional repressor [Source:HGNC Symbol;Acc:HGNC:4237]	-3.48876	-11.2259
ENSG00000260400	NA	AL513534.3	lncRNA	Clone-based (Ensembl) gene	1	novel transcript, overlapping to TET1	-3.48263	-11.1783
ENSG00000224389	721	C4B	protein_coding	HGNC Symbol	19	complement C4B (Chido blood group) [Source:HGNC Symbol;Acc:HGNC:1324]	-3.47645	-11.1306
ENSG00000266446	NA	AL449423.1	lncRNA	Clone-based (Ensembl) gene	1	novel transcript, sense intronic CDKN2B-AS1	-3.46429	-11.0371
ENSG00000204262	1290	COL5A2	protein_coding	HGNC Symbol	4	collagen type V alpha 2 chain [Source:HGNC Symbol;Acc:HGNC:2210]	-3.46086	-11.0109
ENSG00000124116	140686	WFDC3	protein_coding	HGNC Symbol	13	WAP four-disulfide core domain 3 [Source:HGNC Symbol;Acc:HGNC:15957]	-3.43391	-10.8071
ENSG00000264514	NA	AP000915.1	lncRNA	Clone-based (Ensembl) gene	1	novel transcript	-3.41924	-10.6978
ENSG00000138080	11117	EMILIN1	protein_coding	HGNC Symbol	2	elastin microfibril interfacer 1 [Source:HGNC Symbol;Acc:HGNC:19880]	-3.41368	-10.6566
ENSG00000257126	NA	FOXG1-AS1	lncRNA	HGNC Symbol	5	FOXG1 antisense RNA 1 [Source:HGNC Symbol;Acc:HGNC:50663]	-3.41269	-10.6493
ENSG00000260597	NA	AC012531.1	lncRNA	Clone-based (Ensembl) gene	1	novel transcript	-3.39768	-10.5391
ENSG00000250786	NA	SNHG18	lncRNA	HGNC Symbol	3	small nucleolar RNA host gene 18 [Source:HGNC Symbol;Acc:HGNC:49007]	-3.39164	-10.495
ENSG00000168874	84913	ATOH8	protein_coding	HGNC Symbol	5	atonal bHLH transcription factor 8 [Source:HGNC Symbol;Acc:HGNC:24126]	-3.38967	-10.4807
ENSG00000225511	NA	LINC00475	transcribed_unprocessed_pseudogene	HGNC Symbol	9	long intergenic non-protein coding RNA 475 [Source:HGNC Symbol;Acc:HGNC:23569]	-3.38625	-10.4559
ENSG00000182752	5069	PAPPA	protein_coding	HGNC Symbol	3	pappalysin 1 [Source:HGNC Symbol;Acc:HGNC:8602]	-3.38585	-10.453
ENSG00000248429	NA	FAM198B-AS1	lncRNA	HGNC Symbol	5	FAM198B antisense RNA 1 [Source:HGNC Symbol;Acc:HGNC:53132]	-3.3818	-10.4238
ENSG00000137752	834	CASP1	protein_coding	HGNC Symbol	17	caspase 1 [Source:HGNC Symbol;Acc:HGNC:1499]	-3.37879	-10.402
ENSG00000255389	NA	Z97989.1	lncRNA	Clone-based (Ensembl) gene	1	chromosome 6 open reading frame 3	-3.36619	-10.3115
ENSG00000264714	NA	KIAA0895LP1	transcribed_processed_pseudogene	HGNC Symbol	2	KIAA00895L pseudogene 1 [Source:HGNC Symbol;Acc:HGNC:53865]	-3.35033	-10.1988
ENSG00000168918	3635	INPP5D	protein_coding	HGNC Symbol	14	inositol polyphosphate-5-phosphatase D [Source:HGNC Symbol;Acc:HGNC:6079]	-3.33696	-10.1048
ENSG00000140682	7041	TGFB1I1	protein_coding	HGNC Symbol	17	transforming growth factor beta 1 induced transcript 1 [Source:HGNC Symbol;Acc:HGNC:11767]	-3.32268	-10.0052
ENSG00000185499	4582	MUC1	protein_coding	HGNC Symbol	29	mucin 1, cell surface associated [Source:HGNC Symbol;Acc:HGNC:7508]	-3.30343	-9.87261
ENSG00000143341	83872	HMCN1	protein_coding	HGNC Symbol	5	hemicentin 1 [Source:HGNC Symbol;Acc:HGNC:19194]	-3.29866	-9.84001
ENSG00000182326	716	C1S	protein_coding	HGNC Symbol	21	complement C1s [Source:HGNC Symbol;Acc:HGNC:1247]	-3.29782	-9.83431
ENSG00000251350	NA	LINC02475	lncRNA	HGNC Symbol	4	long intergenic non-protein coding RNA 2475 [Source:HGNC Symbol;Acc:HGNC:53418]	-3.28258	-9.73095
ENSG00000155254	83742	MARVELD1	protein_coding	HGNC Symbol	4	MARVEL domain containing 1 [Source:HGNC Symbol;Acc:HGNC:28674]	-3.2819	-9.72639
ENSG00000112992	23530	NNT	protein_coding	HGNC Symbol	24	nicotinamide nucleotide transhydrogenase [Source:HGNC Symbol;Acc:HGNC:7863]	-3.27495	-9.67962
ENSG00000251370	NA	SEMA5A-AS1	lncRNA	HGNC Symbol	1	SEMA5A antisense RNA 1 [Source:HGNC Symbol;Acc:HGNC:52973]	-3.27137	-9.65562
ENSG00000248698	NA	LINC01085	transcribed_processed_pseudogene	HGNC Symbol	5	long intergenic non-protein coding RNA 1085 [Source:HGNC Symbol;Acc:HGNC:27198]	-3.25871	-9.57124
ENSG00000221963	80830	APOL6	protein_coding	HGNC Symbol	1	apolipoprotein L6 [Source:HGNC Symbol;Acc:HGNC:14870]	-3.25682	-9.55876
ENSG00000273008	NA	AC010864.1	lncRNA	Clone-based (Ensembl) gene	1	novel transcript	-3.24447	-9.47725
ENSG00000204261	NA	PSMB8-AS1	lncRNA	HGNC Symbol	7	PSMB8 antisense RNA 1 (head to head) [Source:HGNC Symbol;Acc:HGNC:39758]	-3.2356	-9.41914
ENSG00000172594	10924	SMPDL3A	protein_coding	HGNC Symbol	3	sphingomyelin phosphodiesterase acid like 3A [Source:HGNC Symbol;Acc:HGNC:17389]	-3.21945	-9.31432
ENSG00000146966	27147	DENND2A	protein_coding	HGNC Symbol	10	DENN domain containing 2A [Source:HGNC Symbol;Acc:HGNC:22212]	-3.21275	-9.27114
ENSG00000122420	5737	PTGFR	protein_coding	HGNC Symbol	4	prostaglandin F receptor [Source:HGNC Symbol;Acc:HGNC:9600]	-3.20497	-9.22131
ENSG00000111801	10384	BTN3A3	protein_coding	HGNC Symbol	15	butyrophilin subfamily 3 member A3 [Source:HGNC Symbol;Acc:HGNC:1140]	-3.19701	-9.17056
ENSG00000228638	NA	FCF1P2	transcribed_processed_pseudogene	HGNC Symbol	1	FCF1 pseudogene 2 [Source:HGNC Symbol;Acc:HGNC:44614]	-3.18258	-9.07926
ENSG00000179954	284297	SSC5D	protein_coding	HGNC Symbol	5	scavenger receptor cysteine rich family member with 5 domains [Source:HGNC Symbol;Acc:HGNC:26641]	-3.17875	-9.05524
ENSG00000203797	8528	DDO	protein_coding	HGNC Symbol	4	D-aspartate oxidase [Source:HGNC Symbol;Acc:HGNC:2727]	-3.16871	-8.99245
ENSG00000123096	8082	SSPN	protein_coding	HGNC Symbol	8	sarcospan [Source:HGNC Symbol;Acc:HGNC:11322]	-3.15826	-8.92754
ENSG00000198846	9760	TOX	protein_coding	HGNC Symbol	1	thymocyte selection associated high mobility group box [Source:HGNC Symbol;Acc:HGNC:18988]	-3.15528	-8.90907
ENSG00000185052	57419	SLC24A3	protein_coding	HGNC Symbol	2	solute carrier family 24 member 3 [Source:HGNC Symbol;Acc:HGNC:10977]	-3.14579	-8.85069
ENSG00000184898	375287	RBM43	protein_coding	HGNC Symbol	2	RNA binding motif protein 43 [Source:HGNC Symbol;Acc:HGNC:24790]	-3.14157	-8.82483
ENSG00000231010	NA	AL121672.1	lncRNA	Clone-based (Ensembl) gene	1	novel transcript	-3.13203	-8.76669
ENSG00000257354	NA	AC048341.1	lncRNA	Clone-based (Ensembl) gene	1	novel transcript	-3.10899	-8.62781
ENSG00000229619	NA	MBNL1-AS1	lncRNA	HGNC Symbol	4	MBNL1 antisense RNA 1 [Source:HGNC Symbol;Acc:HGNC:44584]	-3.10512	-8.6047
ENSG00000178860	9242	MSC	protein_coding	HGNC Symbol	3	musculin [Source:HGNC Symbol;Acc:HGNC:7321]	-3.09591	-8.54994
ENSG00000277758	102724488	FO681492.1	protein_coding	Clone-based (Ensembl) gene	3	synaptotagmin-15 [Source:NCBI gene;Acc:102724488]	-3.07778	-8.44313
ENSG00000138395	65061	CDK15	protein_coding	HGNC Symbol	10	cyclin dependent kinase 15 [Source:HGNC Symbol;Acc:HGNC:14434]	-3.07754	-8.44174
ENSG00000148848	8038	ADAM12	protein_coding	HGNC Symbol	7	ADAM metallopeptidase domain 12 [Source:HGNC Symbol;Acc:HGNC:190]	-3.07547	-8.42963
ENSG00000197757	3223	HOXC6	protein_coding	HGNC Symbol	4	homeobox C6 [Source:HGNC Symbol;Acc:HGNC:5128]	-3.06569	-8.3727
ENSG00000073146	54456	MOV10L1	protein_coding	HGNC Symbol	10	Mov10 like RISC complex RNA helicase 1 [Source:HGNC Symbol;Acc:HGNC:7201]	-3.06311	-8.35772
ENSG00000147041	94122	SYTL5	protein_coding	HGNC Symbol	2	synaptotagmin like 5 [Source:HGNC Symbol;Acc:HGNC:15589]	-3.05172	-8.29197
ENSG00000237172	84752	B3GNT9	protein_coding	HGNC Symbol	1	UDP-GlcNAc:betaGal beta-1,3-N-acetylglucosaminyltransferase 9 [Source:HGNC Symbol;Acc:HGNC:28714]	-3.04965	-8.28008
ENSG00000255690	9865	TRIL	protein_coding	HGNC Symbol	1	TLR4 interactor with leucine rich repeats [Source:HGNC Symbol;Acc:HGNC:22200]	-3.03761	-8.21129
ENSG00000136205	64759	TNS3	protein_coding	HGNC Symbol	12	tensin 3 [Source:HGNC Symbol;Acc:HGNC:21616]	-2.99988	-7.99932
ENSG00000249669	NA	CARMN	lncRNA	HGNC Symbol	19	cardiac mesoderm enhancer-associated non-coding RNA [Source:HGNC Symbol;Acc:HGNC:42872]	-2.98159	-7.89858
ENSG00000233101	NA	HOXB-AS3	lncRNA	HGNC Symbol	15	HOXB cluster antisense RNA 3 [Source:HGNC Symbol;Acc:HGNC:40283]	-2.97437	-7.85915
ENSG00000244694	442213	PTCHD4	protein_coding	HGNC Symbol	2	patched domain containing 4 [Source:HGNC Symbol;Acc:HGNC:21345]	-2.97101	-7.84083
ENSG00000164342	7098	TLR3	protein_coding	HGNC Symbol	5	toll like receptor 3 [Source:HGNC Symbol;Acc:HGNC:11849]	-2.9676	-7.82232
ENSG00000182168	8633	UNC5C	protein_coding	HGNC Symbol	5	unc-5 netrin receptor C [Source:HGNC Symbol;Acc:HGNC:12569]	-2.96035	-7.78314
ENSG00000107796	59	ACTA2	protein_coding	HGNC Symbol	6	actin alpha 2, smooth muscle [Source:HGNC Symbol;Acc:HGNC:130]	-2.95831	-7.77215
ENSG00000068079	3430	IFI35	protein_coding	HGNC Symbol	8	interferon induced protein 35 [Source:HGNC Symbol;Acc:HGNC:5399]	-2.95524	-7.75561
ENSG00000233251	NA	AC007743.1	lncRNA	Clone-based (Ensembl) gene	5	novel transcript, antisense to CCDC85A	-2.95499	-7.75428
ENSG00000221949	NA	LINC01465	lncRNA	HGNC Symbol	2	long intergenic non-protein coding RNA 1465 [Source:HGNC Symbol;Acc:HGNC:26364]	-2.95431	-7.75062
ENSG00000275180	NA	AC048341.2	lncRNA	Clone-based (Ensembl) gene	1	novel transcript	-2.94868	-7.72041
ENSG00000137809	22801	ITGA11	protein_coding	HGNC Symbol	7	integrin subunit alpha 11 [Source:HGNC Symbol;Acc:HGNC:6136]	-2.9414	-7.68156
ENSG00000162670	339479	BRINP3	protein_coding	HGNC Symbol	5	BMP/retinoic acid inducible neural specific 3 [Source:HGNC Symbol;Acc:HGNC:22393]	-2.93981	-7.67311
ENSG00000174428	389524	GTF2IRD2B	protein_coding	HGNC Symbol	10	GTF2I repeat domain containing 2B [Source:HGNC Symbol;Acc:HGNC:33125]	-2.93547	-7.65007
ENSG00000198205	7789	ZXDA	protein_coding	HGNC Symbol	1	zinc finger X-linked duplicated A [Source:HGNC Symbol;Acc:HGNC:13198]	-2.92634	-7.60181
ENSG00000170004	1107	CHD3	protein_coding	HGNC Symbol	20	chromodomain helicase DNA binding protein 3 [Source:HGNC Symbol;Acc:HGNC:1918]	-2.9023	-7.47616
ENSG00000162654	115361	GBP4	protein_coding	HGNC Symbol	3	guanylate binding protein 4 [Source:HGNC Symbol;Acc:HGNC:20480]	-2.89936	-7.46096
ENSG00000154864	63895	PIEZO2	protein_coding	HGNC Symbol	15	piezo type mechanosensitive ion channel component 2 [Source:HGNC Symbol;Acc:HGNC:26270]	-2.89142	-7.41998
ENSG00000163017	72	ACTG2	protein_coding	HGNC Symbol	9	actin gamma 2, smooth muscle [Source:HGNC Symbol;Acc:HGNC:145]	-2.88902	-7.40767
ENSG00000197093	79690	GAL3ST4	protein_coding	HGNC Symbol	8	galactose-3-O-sulfotransferase 4 [Source:HGNC Symbol;Acc:HGNC:24145]	-2.88665	-7.3955
ENSG00000250961	NA	AC025470.2	lncRNA	Clone-based (Ensembl) gene	2	novel transcript, antisense to ACTBL2	-2.88556	-7.38992
ENSG00000235499	NA	AC073046.1	lncRNA	Clone-based (Ensembl) gene	1	novel transcript (LOC100132318)	-2.88107	-7.36698
ENSG00000215386	NA	MIR99AHG	lncRNA	HGNC Symbol	143	mir-99a-let-7c cluster host gene [Source:HGNC Symbol;Acc:HGNC:1274]	-2.87793	-7.35095
ENSG00000188153	1287	COL4A5	protein_coding	HGNC Symbol	12	collagen type IV alpha 5 chain [Source:HGNC Symbol;Acc:HGNC:2207]	-2.87329	-7.32732
ENSG00000259583	NA	AC015712.2	lncRNA	Clone-based (Ensembl) gene	5	novel transcript, antisense to LRRK1 and ALDH1A3	-2.86285	-7.27448
ENSG00000112902	9037	SEMA5A	protein_coding	HGNC Symbol	5	semaphorin 5A [Source:HGNC Symbol;Acc:HGNC:10736]	-2.86203	-7.27039
ENSG00000264630	NA	PRKCA-AS1	lncRNA	HGNC Symbol	3	PRKCA antisense RNA 1 [Source:HGNC Symbol;Acc:HGNC:51347]	-2.8557	-7.23854
ENSG00000128606	10234	LRRC17	protein_coding	HGNC Symbol	5	leucine rich repeat containing 17 [Source:HGNC Symbol;Acc:HGNC:16895]	-2.85501	-7.23507
ENSG00000177340	NA	AC024940.1	lncRNA	Clone-based (Ensembl) gene	1	novel transcript, antisense to FAM60A	-2.84834	-7.20173
ENSG00000139178	51279	C1RL	protein_coding	HGNC Symbol	12	complement C1r subcomponent like [Source:HGNC Symbol;Acc:HGNC:21265]	-2.83971	-7.15877
ENSG00000230499	NA	AC108463.2	lncRNA	Clone-based (Ensembl) gene	1	novel transcript	-2.83971	-7.15876
ENSG00000119403	26147	PHF19	protein_coding	HGNC Symbol	14	PHD finger protein 19 [Source:HGNC Symbol;Acc:HGNC:24566]	-2.82043	-7.06374
ENSG00000225614	84627	ZNF469	protein_coding	HGNC Symbol	2	zinc finger protein 469 [Source:HGNC Symbol;Acc:HGNC:23216]	-2.82033	-7.06326
ENSG00000136010	160428	ALDH1L2	protein_coding	HGNC Symbol	7	aldehyde dehydrogenase 1 family member L2 [Source:HGNC Symbol;Acc:HGNC:26777]	-2.79159	-6.92392
ENSG00000185565	4045	LSAMP	protein_coding	HGNC Symbol	7	limbic system associated membrane protein [Source:HGNC Symbol;Acc:HGNC:6705]	-2.77936	-6.86548
ENSG00000157227	4323	MMP14	protein_coding	HGNC Symbol	6	matrix metallopeptidase 14 [Source:HGNC Symbol;Acc:HGNC:7160]	-2.77603	-6.84967
ENSG00000177374	3090	HIC1	protein_coding	HGNC Symbol	7	HIC ZBTB transcriptional repressor 1 [Source:HGNC Symbol;Acc:HGNC:4909]	-2.77403	-6.84015
ENSG00000272933	NA	AL391121.1	lncRNA	Clone-based (Ensembl) gene	1	novel transcript	-2.77273	-6.83401
ENSG00000253159	26025	PCDHGA12	protein_coding	HGNC Symbol	2	protocadherin gamma subfamily A, 12 [Source:HGNC Symbol;Acc:HGNC:8699]	-2.76491	-6.79705
ENSG00000157873	8764	TNFRSF14	protein_coding	HGNC Symbol	16	TNF receptor superfamily member 14 [Source:HGNC Symbol;Acc:HGNC:11912]	-2.75816	-6.76533
ENSG00000072657	29953	TRHDE	protein_coding	HGNC Symbol	7	thyrotropin releasing hormone degrading enzyme [Source:HGNC Symbol;Acc:HGNC:30748]	-2.75675	-6.75874
ENSG00000185432	25840	METTL7A	protein_coding	HGNC Symbol	5	methyltransferase like 7A [Source:HGNC Symbol;Acc:HGNC:24550]	-2.75432	-6.74734
ENSG00000128713	3237	HOXD11	protein_coding	HGNC Symbol	2	homeobox D11 [Source:HGNC Symbol;Acc:HGNC:5134]	-2.7496	-6.72532
ENSG00000113140	6678	SPARC	protein_coding	HGNC Symbol	9	secreted protein acidic and cysteine rich [Source:HGNC Symbol;Acc:HGNC:11219]	-2.74831	-6.71929
ENSG00000249035	NA	CLMAT3	lncRNA	HGNC Symbol	3	colorectal liver metastasis associated transcript 3 [Source:HGNC Symbol;Acc:HGNC:52287]	-2.73922	-6.67711
ENSG00000133321	5920	PLAAT4	protein_coding	HGNC Symbol	5	phospholipase A and acyltransferase 4 [Source:HGNC Symbol;Acc:HGNC:9869]	-2.7385	-6.67377
ENSG00000143387	1513	CTSK	protein_coding	HGNC Symbol	3	cathepsin K [Source:HGNC Symbol;Acc:HGNC:2536]	-2.7373	-6.66819
ENSG00000236383	100874261	CCDC200	protein_coding	HGNC Symbol	16	coiled-coil domain containing 200 [Source:HGNC Symbol;Acc:HGNC:43658]	-2.72939	-6.63176
ENSG00000196562	55959	SULF2	protein_coding	HGNC Symbol	12	sulfatase 2 [Source:HGNC Symbol;Acc:HGNC:20392]	-2.72298	-6.60235
ENSG00000198121	1902	LPAR1	protein_coding	HGNC Symbol	5	lysophosphatidic acid receptor 1 [Source:HGNC Symbol;Acc:HGNC:3166]	-2.72153	-6.59571
ENSG00000055813	114800	CCDC85A	protein_coding	HGNC Symbol	1	coiled-coil domain containing 85A [Source:HGNC Symbol;Acc:HGNC:29400]	-2.71393	-6.56107
ENSG00000225774	NA	SIRPAP1	processed_pseudogene	HGNC Symbol	1	signal regulatory protein alpha pseudogene 1 [Source:HGNC Symbol;Acc:HGNC:9663]	-2.69882	-6.4927
ENSG00000226478	NA	UPF3AP1	processed_pseudogene	HGNC Symbol	1	UPF3A pseudogene 1 [Source:HGNC Symbol;Acc:HGNC:30568]	-2.68746	-6.44177
ENSG00000240875	NA	LINC00886	lncRNA	HGNC Symbol	5	long intergenic non-protein coding RNA 886 [Source:HGNC Symbol;Acc:HGNC:48572]	-2.68229	-6.41872
ENSG00000171408	27115	PDE7B	protein_coding	HGNC Symbol	3	phosphodiesterase 7B [Source:HGNC Symbol;Acc:HGNC:8792]	-2.67952	-6.40642
ENSG00000275322	NA	AC103746.1	lncRNA	Clone-based (Ensembl) gene	1	novel transcript	-2.67642	-6.39269
ENSG00000163565	3428	IFI16	protein_coding	HGNC Symbol	14	interferon gamma inducible protein 16 [Source:HGNC Symbol;Acc:HGNC:5395]	-2.67427	-6.38314
ENSG00000204176	83849	SYT15	protein_coding	HGNC Symbol	6	synaptotagmin 15 [Source:HGNC Symbol;Acc:HGNC:17167]	-2.67079	-6.36777
ENSG00000197724	5253	PHF2	protein_coding	HGNC Symbol	3	PHD finger protein 2 [Source:HGNC Symbol;Acc:HGNC:8920]	-2.66961	-6.36256
ENSG00000162733	4921	DDR2	protein_coding	HGNC Symbol	9	discoidin domain receptor tyrosine kinase 2 [Source:HGNC Symbol;Acc:HGNC:2731]	-2.6695	-6.36208
ENSG00000274276	102724560	CBSL	protein_coding	HGNC Symbol	10	cystathionine beta-synthase like [Source:HGNC Symbol;Acc:HGNC:51829]	-2.6664	-6.34841
ENSG00000150281	1489	CTF1	protein_coding	HGNC Symbol	2	cardiotrophin 1 [Source:HGNC Symbol;Acc:HGNC:2499]	-2.66536	-6.34384
ENSG00000229867	NA	STEAP3-AS1	lncRNA	HGNC Symbol	2	STEAP3 antisense RNA 1 [Source:HGNC Symbol;Acc:HGNC:41053]	-2.66236	-6.33068
ENSG00000099250	8829	NRP1	protein_coding	HGNC Symbol	14	neuropilin 1 [Source:HGNC Symbol;Acc:HGNC:8004]	-2.66114	-6.32535
ENSG00000217026	NA	RPL10P1	processed_pseudogene	HGNC Symbol	1	ribosomal protein L10 pseudogene 1 [Source:HGNC Symbol;Acc:HGNC:10300]	-2.65142	-6.28286
ENSG00000100968	4776	NFATC4	protein_coding	HGNC Symbol	33	nuclear factor of activated T cells 4 [Source:HGNC Symbol;Acc:HGNC:7778]	-2.65004	-6.27684
ENSG00000153820	80309	SPHKAP	protein_coding	HGNC Symbol	3	SPHK1 interactor, AKAP domain containing [Source:HGNC Symbol;Acc:HGNC:30619]	-2.64867	-6.2709
ENSG00000105851	5294	PIK3CG	protein_coding	HGNC Symbol	5	phosphatidylinositol-4,5-bisphosphate 3-kinase catalytic subunit gamma [Source:HGNC Symbol;Acc:HGNC:8978]	-2.64773	-6.26678
ENSG00000231169	NA	EEF1B2P1	processed_pseudogene	HGNC Symbol	1	eukaryotic translation elongation factor 1 beta 2 pseudogene 1 [Source:HGNC Symbol;Acc:HGNC:3207]	-2.64692	-6.26329
ENSG00000119922	3433	IFIT2	protein_coding	HGNC Symbol	3	interferon induced protein with tetratricopeptide repeats 2 [Source:HGNC Symbol;Acc:HGNC:5409]	-2.64021	-6.23423
ENSG00000138119	26509	MYOF	protein_coding	HGNC Symbol	9	myoferlin [Source:HGNC Symbol;Acc:HGNC:3656]	-2.63665	-6.21888
ENSG00000164161	64399	HHIP	protein_coding	HGNC Symbol	8	hedgehog interacting protein [Source:HGNC Symbol;Acc:HGNC:14866]	-2.63477	-6.21078
ENSG00000229152	NA	ANKRD10-IT1	lncRNA	HGNC Symbol	1	ANKRD10 intronic transcript 1 [Source:HGNC Symbol;Acc:HGNC:39891]	-2.63358	-6.20562
ENSG00000064201	10077	TSPAN32	protein_coding	HGNC Symbol	17	tetraspanin 32 [Source:HGNC Symbol;Acc:HGNC:13410]	-2.62978	-6.18931
ENSG00000271533	NA	Z83843.1	lncRNA	Clone-based (Ensembl) gene	1	novel transcript, sense intronic FTX	-2.62632	-6.17451
ENSG00000144063	7851	MALL	protein_coding	HGNC Symbol	3	mal, T cell differentiation protein like [Source:HGNC Symbol;Acc:HGNC:6818]	-2.62586	-6.17252
ENSG00000135298	577	ADGRB3	protein_coding	HGNC Symbol	5	adhesion G protein-coupled receptor B3 [Source:HGNC Symbol;Acc:HGNC:945]	-2.622	-6.15604
ENSG00000111335	4939	OAS2	protein_coding	HGNC Symbol	7	2'-5'-oligoadenylate synthetase 2 [Source:HGNC Symbol;Acc:HGNC:8087]	-2.61812	-6.13949
ENSG00000149090	25891	PAMR1	protein_coding	HGNC Symbol	9	peptidase domain containing associated with muscle regeneration 1 [Source:HGNC Symbol;Acc:HGNC:24554]	-2.61544	-6.12812
ENSG00000205220	5699	PSMB10	protein_coding	HGNC Symbol	5	proteasome 20S subunit beta 10 [Source:HGNC Symbol;Acc:HGNC:9538]	-2.60132	-6.06842
ENSG00000170271	10826	FAXDC2	protein_coding	HGNC Symbol	16	fatty acid hydroxylase domain containing 2 [Source:HGNC Symbol;Acc:HGNC:1334]	-2.60021	-6.06376
ENSG00000171206	81603	TRIM8	protein_coding	HGNC Symbol	15	tripartite motif containing 8 [Source:HGNC Symbol;Acc:HGNC:15579]	-2.59702	-6.05036
ENSG00000234432	100129484	AC092171.3	lncRNA	Clone-based (Ensembl) gene	1	uncharacterized LOC100129484 [Source:NCBI gene;Acc:100129484]	-2.59269	-6.03224
ENSG00000184619	124751	KRBA2	protein_coding	HGNC Symbol	5	KRAB-A domain containing 2 [Source:HGNC Symbol;Acc:HGNC:26989]	-2.58234	-5.98909
ENSG00000177096	150368	PHETA2	protein_coding	HGNC Symbol	2	PH domain containing endocytic trafficking adaptor 2 [Source:HGNC Symbol;Acc:HGNC:27161]	-2.57911	-5.97572
ENSG00000130720	84929	FIBCD1	protein_coding	HGNC Symbol	7	fibrinogen C domain containing 1 [Source:HGNC Symbol;Acc:HGNC:25922]	-2.57899	-5.97522
ENSG00000159403	715	C1R	protein_coding	HGNC Symbol	16	complement C1r [Source:HGNC Symbol;Acc:HGNC:1246]	-2.57868	-5.97392
ENSG00000124766	6659	SOX4	protein_coding	HGNC Symbol	1	SRY-box transcription factor 4 [Source:HGNC Symbol;Acc:HGNC:11200]	-2.57391	-5.9542
ENSG00000072952	10335	MRVI1	protein_coding	HGNC Symbol	17	murine retrovirus integration site 1 homolog [Source:HGNC Symbol;Acc:HGNC:7237]	-2.57229	-5.94752
ENSG00000272106	NA	AL691432.2	lncRNA	Clone-based (Ensembl) gene	1	artifact	-2.56983	-5.93741
ENSG00000148680	3363	HTR7	protein_coding	HGNC Symbol	3	5-hydroxytryptamine receptor 7 [Source:HGNC Symbol;Acc:HGNC:5302]	-2.5634	-5.91097
ENSG00000100105	23598	PATZ1	protein_coding	HGNC Symbol	6	POZ/BTB and AT hook containing zinc finger 1 [Source:HGNC Symbol;Acc:HGNC:13071]	-2.55913	-5.89351
ENSG00000129009	3671	ISLR	protein_coding	HGNC Symbol	4	immunoglobulin superfamily containing leucine rich repeat [Source:HGNC Symbol;Acc:HGNC:6133]	-2.55578	-5.87987
ENSG00000263001	2969	GTF2I	protein_coding	HGNC Symbol	23	general transcription factor IIi [Source:HGNC Symbol;Acc:HGNC:4659]	-2.55551	-5.87875
ENSG00000137033	90865	IL33	protein_coding	HGNC Symbol	5	interleukin 33 [Source:HGNC Symbol;Acc:HGNC:16028]	-2.55225	-5.86549
ENSG00000164176	10085	EDIL3	protein_coding	HGNC Symbol	4	EGF like repeats and discoidin domains 3 [Source:HGNC Symbol;Acc:HGNC:3173]	-2.55011	-5.85678
ENSG00000110811	10536	P3H3	protein_coding	HGNC Symbol	11	prolyl 3-hydroxylase 3 [Source:HGNC Symbol;Acc:HGNC:19318]	-2.53975	-5.8149
ENSG00000271474	NA	AC106881.1	lncRNA	Clone-based (Ensembl) gene	1	novel transcript, antisense to UNC5C	-2.5395	-5.81386
ENSG00000113621	79770	TXNDC15	protein_coding	HGNC Symbol	10	thioredoxin domain containing 15 [Source:HGNC Symbol;Acc:HGNC:20652]	-2.53947	-5.81375
ENSG00000129467	196883	ADCY4	protein_coding	HGNC Symbol	19	adenylate cyclase 4 [Source:HGNC Symbol;Acc:HGNC:235]	-2.53769	-5.80661
ENSG00000167779	3489	IGFBP6	protein_coding	HGNC Symbol	5	insulin like growth factor binding protein 6 [Source:HGNC Symbol;Acc:HGNC:5475]	-2.53558	-5.79808
ENSG00000107829	6468	FBXW4	protein_coding	HGNC Symbol	6	F-box and WD repeat domain containing 4 [Source:HGNC Symbol;Acc:HGNC:10847]	-2.53503	-5.79588
ENSG00000234779	NA	BNC2-AS1	lncRNA	HGNC Symbol	1	BNC2 antisense RNA 1 [Source:HGNC Symbol;Acc:HGNC:53727]	-2.535	-5.79578
ENSG00000103544	57020	VPS35L	protein_coding	HGNC Symbol	24	VPS35 endosomal protein sorting factor like [Source:HGNC Symbol;Acc:HGNC:24641]	-2.52511	-5.75617
ENSG00000113721	5159	PDGFRB	protein_coding	HGNC Symbol	11	platelet derived growth factor receptor beta [Source:HGNC Symbol;Acc:HGNC:8804]	-2.51684	-5.72326
ENSG00000177045	147912	SIX5	protein_coding	HGNC Symbol	4	SIX homeobox 5 [Source:HGNC Symbol;Acc:HGNC:10891]	-2.51186	-5.70357
ENSG00000110446	51296	SLC15A3	protein_coding	HGNC Symbol	9	solute carrier family 15 member 3 [Source:HGNC Symbol;Acc:HGNC:18068]	-2.51138	-5.70165
ENSG00000160094	149076	ZNF362	protein_coding	HGNC Symbol	5	zinc finger protein 362 [Source:HGNC Symbol;Acc:HGNC:18079]	-2.50907	-5.69253
ENSG00000155363	4343	MOV10	protein_coding	HGNC Symbol	17	Mov10 RISC complex RNA helicase [Source:HGNC Symbol;Acc:HGNC:7200]	-2.50684	-5.68373
ENSG00000138735	8654	PDE5A	protein_coding	HGNC Symbol	12	phosphodiesterase 5A [Source:HGNC Symbol;Acc:HGNC:8784]	-2.50655	-5.6826
ENSG00000105974	857	CAV1	protein_coding	HGNC Symbol	9	caveolin 1 [Source:HGNC Symbol;Acc:HGNC:1527]	-2.5062	-5.6812
ENSG00000231551	NA	AC245100.4	transcribed_unprocessed_pseudogene	Clone-based (Ensembl) gene	7	phosphodiesterase 4D interacting protein (PDE4DIP) pseudogene	-2.50417	-5.67324
ENSG00000006534	221	ALDH3B1	protein_coding	HGNC Symbol	10	aldehyde dehydrogenase 3 family member B1 [Source:HGNC Symbol;Acc:HGNC:410]	-2.50051	-5.65884
ENSG00000138496	83666	PARP9	protein_coding	HGNC Symbol	7	poly(ADP-ribose) polymerase family member 9 [Source:HGNC Symbol;Acc:HGNC:24118]	-2.49945	-5.65468
ENSG00000134986	9315	NREP	protein_coding	HGNC Symbol	23	neuronal regeneration related protein [Source:HGNC Symbol;Acc:HGNC:16834]	-2.49708	-5.64543
ENSG00000175505	23529	CLCF1	protein_coding	HGNC Symbol	2	cardiotrophin like cytokine factor 1 [Source:HGNC Symbol;Acc:HGNC:17412]	-2.49562	-5.6397
ENSG00000162614	91624	NEXN	protein_coding	HGNC Symbol	8	nexilin F-actin binding protein [Source:HGNC Symbol;Acc:HGNC:29557]	-2.49403	-5.6335
ENSG00000162520	81493	SYNC	protein_coding	HGNC Symbol	4	syncoilin, intermediate filament protein [Source:HGNC Symbol;Acc:HGNC:28897]	-2.49294	-5.62924
ENSG00000144152	129804	FBLN7	protein_coding	HGNC Symbol	7	fibulin 7 [Source:HGNC Symbol;Acc:HGNC:26740]	-2.49152	-5.62368
ENSG00000035115	26751	SH3YL1	protein_coding	HGNC Symbol	29	SH3 and SYLF domain containing 1 [Source:HGNC Symbol;Acc:HGNC:29546]	-2.49111	-5.62209
ENSG00000146674	3486	IGFBP3	protein_coding	HGNC Symbol	11	insulin like growth factor binding protein 3 [Source:HGNC Symbol;Acc:HGNC:5472]	-2.48604	-5.60236
ENSG00000129038	4016	LOXL1	protein_coding	HGNC Symbol	5	lysyl oxidase like 1 [Source:HGNC Symbol;Acc:HGNC:6665]	-2.47978	-5.57813
ENSG00000137975	9635	CLCA2	protein_coding	HGNC Symbol	3	chloride channel accessory 2 [Source:HGNC Symbol;Acc:HGNC:2016]	-2.47505	-5.55986
ENSG00000083544	81550	TDRD3	protein_coding	HGNC Symbol	10	tudor domain containing 3 [Source:HGNC Symbol;Acc:HGNC:20612]	-2.46893	-5.53632
ENSG00000119943	84795	PYROXD2	protein_coding	HGNC Symbol	5	pyridine nucleotide-disulphide oxidoreductase domain 2 [Source:HGNC Symbol;Acc:HGNC:23517]	-2.46873	-5.53554
ENSG00000164932	115908	CTHRC1	protein_coding	HGNC Symbol	4	collagen triple helix repeat containing 1 [Source:HGNC Symbol;Acc:HGNC:18831]	-2.46841	-5.53433
ENSG00000178764	22882	ZHX2	protein_coding	HGNC Symbol	2	zinc fingers and homeoboxes 2 [Source:HGNC Symbol;Acc:HGNC:18513]	-2.46695	-5.52876
ENSG00000213563	414919	C8orf82	protein_coding	HGNC Symbol	5	chromosome 8 open reading frame 82 [Source:HGNC Symbol;Acc:HGNC:33826]	-2.46652	-5.52708
ENSG00000130635	1289	COL5A1	protein_coding	HGNC Symbol	8	collagen type V alpha 1 chain [Source:HGNC Symbol;Acc:HGNC:2209]	-2.46576	-5.52418
ENSG00000214309	255374	MBLAC1	protein_coding	HGNC Symbol	2	metallo-beta-lactamase domain containing 1 [Source:HGNC Symbol;Acc:HGNC:22180]	-2.46516	-5.52188
ENSG00000136999	4856	CCN3	protein_coding	HGNC Symbol	2	cellular communication network factor 3 [Source:HGNC Symbol;Acc:HGNC:7885]	-2.45604	-5.48707
ENSG00000197496	81031	SLC2A10	protein_coding	HGNC Symbol	3	solute carrier family 2 member 10 [Source:HGNC Symbol;Acc:HGNC:13444]	-2.44237	-5.43534
ENSG00000172638	30008	EFEMP2	protein_coding	HGNC Symbol	20	EGF containing fibulin extracellular matrix protein 2 [Source:HGNC Symbol;Acc:HGNC:3219]	-2.43539	-5.4091
ENSG00000108691	6347	CCL2	protein_coding	HGNC Symbol	4	C-C motif chemokine ligand 2 [Source:HGNC Symbol;Acc:HGNC:10618]	-2.43177	-5.39555
ENSG00000250451	NA	HOXC-AS1	lncRNA	HGNC Symbol	2	HOXC cluster antisense RNA 1 [Source:HGNC Symbol;Acc:HGNC:43749]	-2.42991	-5.38861
ENSG00000156113	3778	KCNMA1	protein_coding	HGNC Symbol	93	potassium calcium-activated channel subfamily M alpha 1 [Source:HGNC Symbol;Acc:HGNC:6284]	-2.42717	-5.37837
ENSG00000137628	55601	DDX60	protein_coding	HGNC Symbol	6	DExD/H-box helicase 60 [Source:HGNC Symbol;Acc:HGNC:25942]	-2.41736	-5.34192
ENSG00000231952	NA	DPY19L1P2	unprocessed_pseudogene	HGNC Symbol	1	DPY19L1 pseudogene 2 [Source:HGNC Symbol;Acc:HGNC:22851]	-2.41717	-5.34122
ENSG00000149596	57158	JPH2	protein_coding	HGNC Symbol	2	junctophilin 2 [Source:HGNC Symbol;Acc:HGNC:14202]	-2.41616	-5.33747
ENSG00000141574	6398	SECTM1	protein_coding	HGNC Symbol	8	secreted and transmembrane 1 [Source:HGNC Symbol;Acc:HGNC:10707]	-2.41393	-5.32923
ENSG00000087116	9509	ADAMTS2	protein_coding	HGNC Symbol	5	ADAM metallopeptidase with thrombospondin type 1 motif 2 [Source:HGNC Symbol;Acc:HGNC:218]	-2.41282	-5.32513
ENSG00000235138	NA	AL445931.1	lncRNA	Clone-based (Ensembl) gene	1	novel transcript, antisense to BRD3	-2.4079	-5.30702
ENSG00000127995	64921	CASD1	protein_coding	HGNC Symbol	6	CAS1 domain containing 1 [Source:HGNC Symbol;Acc:HGNC:16014]	-2.40684	-5.30313
ENSG00000163092	129446	XIRP2	protein_coding	HGNC Symbol	10	xin actin binding repeat containing 2 [Source:HGNC Symbol;Acc:HGNC:14303]	-2.40039	-5.27946
ENSG00000170390	166614	DCLK2	protein_coding	HGNC Symbol	7	doublecortin like kinase 2 [Source:HGNC Symbol;Acc:HGNC:19002]	-2.39883	-5.27374
ENSG00000123609	9111	NMI	protein_coding	HGNC Symbol	4	N-myc and STAT interactor [Source:HGNC Symbol;Acc:HGNC:7854]	-2.39773	-5.26975
ENSG00000088882	56265	CPXM1	protein_coding	HGNC Symbol	1	carboxypeptidase X, M14 family member 1 [Source:HGNC Symbol;Acc:HGNC:15771]	-2.39754	-5.26903
ENSG00000159231	874	CBR3	protein_coding	HGNC Symbol	1	carbonyl reductase 3 [Source:HGNC Symbol;Acc:HGNC:1549]	-2.39728	-5.2681
ENSG00000234290	NA	AC116366.2	lncRNA	Clone-based (Ensembl) gene	1	novel transcript	-2.39522	-5.26058
ENSG00000139192	55080	TAPBPL	protein_coding	HGNC Symbol	8	TAP binding protein like [Source:HGNC Symbol;Acc:HGNC:30683]	-2.38945	-5.23957
ENSG00000150540	3176	HNMT	protein_coding	HGNC Symbol	8	histamine N-methyltransferase [Source:HGNC Symbol;Acc:HGNC:5028]	-2.38888	-5.23751
ENSG00000248092	NA	NNT-AS1	lncRNA	HGNC Symbol	8	NNT antisense RNA 1 [Source:HGNC Symbol;Acc:HGNC:49005]	-2.38627	-5.22805
ENSG00000154237	79705	LRRK1	protein_coding	HGNC Symbol	11	leucine rich repeat kinase 1 [Source:HGNC Symbol;Acc:HGNC:18608]	-2.38521	-5.22419
ENSG00000169933	9758	FRMPD4	protein_coding	HGNC Symbol	11	FERM and PDZ domain containing 4 [Source:HGNC Symbol;Acc:HGNC:29007]	-2.38464	-5.22213
ENSG00000186340	7058	THBS2	protein_coding	HGNC Symbol	7	thrombospondin 2 [Source:HGNC Symbol;Acc:HGNC:11786]	-2.38194	-5.21237
ENSG00000183770	668	FOXL2	protein_coding	HGNC Symbol	1	forkhead box L2 [Source:HGNC Symbol;Acc:HGNC:1092]	-2.38059	-5.20749
ENSG00000005243	51226	COPZ2	protein_coding	HGNC Symbol	10	COPI coat complex subunit zeta 2 [Source:HGNC Symbol;Acc:HGNC:19356]	-2.37845	-5.19979
ENSG00000175745	7025	NR2F1	protein_coding	HGNC Symbol	6	nuclear receptor subfamily 2 group F member 1 [Source:HGNC Symbol;Acc:HGNC:7975]	-2.37614	-5.19146
ENSG00000038427	1462	VCAN	protein_coding	HGNC Symbol	12	versican [Source:HGNC Symbol;Acc:HGNC:2464]	-2.37102	-5.17306
ENSG00000226824	NA	AC006001.2	lncRNA	Clone-based (Ensembl) gene	6	novel transcript	-2.36943	-5.16737
ENSG00000231160	NA	KLF3-AS1	lncRNA	HGNC Symbol	17	KLF3 antisense RNA 1 [Source:HGNC Symbol;Acc:HGNC:25796]	-2.36639	-5.15649
ENSG00000120594	84898	PLXDC2	protein_coding	HGNC Symbol	3	plexin domain containing 2 [Source:HGNC Symbol;Acc:HGNC:21013]	-2.36599	-5.15507
ENSG00000084636	1307	COL16A1	protein_coding	HGNC Symbol	17	collagen type XVI alpha 1 chain [Source:HGNC Symbol;Acc:HGNC:2193]	-2.36136	-5.13855
ENSG00000108821	1277	COL1A1	protein_coding	HGNC Symbol	13	collagen type I alpha 1 chain [Source:HGNC Symbol;Acc:HGNC:2197]	-2.35851	-5.1284
ENSG00000143222	51506	UFC1	protein_coding	HGNC Symbol	6	ubiquitin-fold modifier conjugating enzyme 1 [Source:HGNC Symbol;Acc:HGNC:26941]	-2.35455	-5.11435
ENSG00000168077	51435	SCARA3	protein_coding	HGNC Symbol	2	scavenger receptor class A member 3 [Source:HGNC Symbol;Acc:HGNC:19000]	-2.35403	-5.1125
ENSG00000102870	23361	ZNF629	protein_coding	HGNC Symbol	1	zinc finger protein 629 [Source:HGNC Symbol;Acc:HGNC:29008]	-2.35099	-5.10176
ENSG00000254509	NA	AP000866.3	processed_pseudogene	Clone-based (Ensembl) gene	1	endothelial cell adhesion molecule (ESAM) pseudogene	-2.34914	-5.0952
ENSG00000000971	3075	CFH	protein_coding	HGNC Symbol	6	complement factor H [Source:HGNC Symbol;Acc:HGNC:4883]	-2.34749	-5.08939
ENSG00000171984	149840	SHLD1	protein_coding	HGNC Symbol	4	shieldin complex subunit 1 [Source:HGNC Symbol;Acc:HGNC:26318]	-2.34735	-5.08889
ENSG00000122863	9469	CHST3	protein_coding	HGNC Symbol	1	carbohydrate sulfotransferase 3 [Source:HGNC Symbol;Acc:HGNC:1971]	-2.34044	-5.06459
ENSG00000236992	NA	RPL12P12	processed_pseudogene	HGNC Symbol	1	ribosomal protein L12 pseudogene 12 [Source:HGNC Symbol;Acc:HGNC:15951]	-2.33781	-5.05536
ENSG00000157613	90993	CREB3L1	protein_coding	HGNC Symbol	6	cAMP responsive element binding protein 3 like 1 [Source:HGNC Symbol;Acc:HGNC:18856]	-2.33777	-5.05522
ENSG00000157168	3084	NRG1	protein_coding	HGNC Symbol	37	neuregulin 1 [Source:HGNC Symbol;Acc:HGNC:7997]	-2.33753	-5.05438
ENSG00000170955	112464	CAVIN3	protein_coding	HGNC Symbol	4	caveolae associated protein 3 [Source:HGNC Symbol;Acc:HGNC:9400]	-2.33481	-5.04485
ENSG00000196741	NA	LINC01560	lncRNA	HGNC Symbol	2	long intergenic non-protein coding RNA 1560 [Source:HGNC Symbol;Acc:HGNC:27333]	-2.33368	-5.04091
ENSG00000112769	3910	LAMA4	protein_coding	HGNC Symbol	24	laminin subunit alpha 4 [Source:HGNC Symbol;Acc:HGNC:6484]	-2.33191	-5.03472
ENSG00000204442	728215	FAM155A	protein_coding	HGNC Symbol	1	family with sequence similarity 155 member A [Source:HGNC Symbol;Acc:HGNC:33877]	-2.329	-5.02455
ENSG00000244731	110384692	C4A	protein_coding	HGNC Symbol	17	complement C4A (Rodgers blood group) [Source:HGNC Symbol;Acc:HGNC:1323]	-2.32529	-5.01166
ENSG00000244731	720	C4A	protein_coding	HGNC Symbol	17	complement C4A (Rodgers blood group) [Source:HGNC Symbol;Acc:HGNC:1323]	-2.32529	-5.01166
ENSG00000099958	91319	DERL3	protein_coding	HGNC Symbol	10	derlin 3 [Source:HGNC Symbol;Acc:HGNC:14236]	-2.32506	-5.01087
ENSG00000108784	4669	NAGLU	protein_coding	HGNC Symbol	5	N-acetyl-alpha-glucosaminidase [Source:HGNC Symbol;Acc:HGNC:7632]	-2.32362	-5.00587
ENSG00000141510	7157	TP53	protein_coding	HGNC Symbol	29	tumor protein p53 [Source:HGNC Symbol;Acc:HGNC:11998]	-2.32149	-4.99849
ENSG00000266865	NA	AC138207.8	transcribed_unprocessed_pseudogene	Clone-based (Ensembl) gene	6	SMAD specific E3 ubiquitin protein ligase 2 (SMURF2) pseudogene	-2.31962	-4.992
ENSG00000228223	NA	HCG11	lncRNA	HGNC Symbol	1	HLA complex group 11 [Source:HGNC Symbol;Acc:HGNC:17707]	-2.31437	-4.97387
ENSG00000112186	10486	CAP2	protein_coding	HGNC Symbol	9	cyclase associated actin cytoskeleton regulatory protein 2 [Source:HGNC Symbol;Acc:HGNC:20039]	-2.31361	-4.97126
ENSG00000259146	NA	AC005476.2	lncRNA	Clone-based (Ensembl) gene	3	novel transcript, antisense to SIPA1L1	-2.31321	-4.96989
ENSG00000227051	56967	C14orf132	protein_coding	HGNC Symbol	4	chromosome 14 open reading frame 132 [Source:HGNC Symbol;Acc:HGNC:20346]	-2.31279	-4.96842
ENSG00000253767	9708	PCDHGA8	protein_coding	HGNC Symbol	2	protocadherin gamma subfamily A, 8 [Source:HGNC Symbol;Acc:HGNC:8706]	-2.30884	-4.95483
ENSG00000211772	NA	TRBC2	TR_C_gene	HGNC Symbol	1	T cell receptor beta constant 2 [Source:HGNC Symbol;Acc:HGNC:12157]	-2.30628	-4.94605
ENSG00000108950	54757	FAM20A	protein_coding	HGNC Symbol	7	FAM20A golgi associated secretory pathway pseudokinase [Source:HGNC Symbol;Acc:HGNC:23015]	-2.30173	-4.93048
ENSG00000166250	79827	CLMP	protein_coding	HGNC Symbol	4	CXADR like membrane protein [Source:HGNC Symbol;Acc:HGNC:24039]	-2.30031	-4.92565
ENSG00000138639	83478	ARHGAP24	protein_coding	HGNC Symbol	12	Rho GTPase activating protein 24 [Source:HGNC Symbol;Acc:HGNC:25361]	-2.29788	-4.91733
ENSG00000234456	NA	MAGI2-AS3	lncRNA	HGNC Symbol	45	MAGI2 antisense RNA 3 [Source:HGNC Symbol;Acc:HGNC:40862]	-2.29767	-4.91662
ENSG00000261324	NA	AC010168.2	lncRNA	Clone-based (Ensembl) gene	1	novel transcript, overlapping HIST4H4	-2.29756	-4.91627
ENSG00000183454	2903	GRIN2A	protein_coding	HGNC Symbol	15	glutamate ionotropic receptor NMDA type subunit 2A [Source:HGNC Symbol;Acc:HGNC:4585]	-2.29729	-4.91534
ENSG00000177409	219285	SAMD9L	protein_coding	HGNC Symbol	9	sterile alpha motif domain containing 9 like [Source:HGNC Symbol;Acc:HGNC:1349]	-2.29543	-4.90899
ENSG00000163359	1293	COL6A3	protein_coding	HGNC Symbol	14	collagen type VI alpha 3 chain [Source:HGNC Symbol;Acc:HGNC:2213]	-2.29416	-4.90469
ENSG00000120616	80314	EPC1	protein_coding	HGNC Symbol	10	enhancer of polycomb homolog 1 [Source:HGNC Symbol;Acc:HGNC:19876]	-2.29234	-4.89849
ENSG00000170365	4086	SMAD1	protein_coding	HGNC Symbol	16	SMAD family member 1 [Source:HGNC Symbol;Acc:HGNC:6767]	-2.28832	-4.88486
ENSG00000153885	79047	KCTD15	protein_coding	HGNC Symbol	12	potassium channel tetramerization domain containing 15 [Source:HGNC Symbol;Acc:HGNC:23297]	-2.28307	-4.86714
ENSG00000119917	3437	IFIT3	protein_coding	HGNC Symbol	2	interferon induced protein with tetratricopeptide repeats 3 [Source:HGNC Symbol;Acc:HGNC:5411]	-2.28276	-4.86607
ENSG00000099377	80270	HSD3B7	protein_coding	HGNC Symbol	4	hydroxy-delta-5-steroid dehydrogenase, 3 beta- and steroid delta-isomerase 7 [Source:HGNC Symbol;Acc:HGNC:18324]	-2.2805	-4.85847
ENSG00000124212	5740	PTGIS	protein_coding	HGNC Symbol	2	prostaglandin I2 synthase [Source:HGNC Symbol;Acc:HGNC:9603]	-2.27972	-4.85585
ENSG00000113369	57561	ARRDC3	protein_coding	HGNC Symbol	7	arrestin domain containing 3 [Source:HGNC Symbol;Acc:HGNC:29263]	-2.27925	-4.85426
ENSG00000232821	NA	AC003986.2	lncRNA	Clone-based (Ensembl) gene	1	novel transcript	-2.2734	-4.83462
ENSG00000130433	59285	CACNG6	protein_coding	HGNC Symbol	3	calcium voltage-gated channel auxiliary subunit gamma 6 [Source:HGNC Symbol;Acc:HGNC:13625]	-2.27328	-4.83421
ENSG00000184371	1435	CSF1	protein_coding	HGNC Symbol	9	colony stimulating factor 1 [Source:HGNC Symbol;Acc:HGNC:2432]	-2.27303	-4.83338
ENSG00000267121	NA	AC008105.3	lncRNA	Clone-based (Ensembl) gene	6	novel transcript, antisense to FMNL1	-2.2705	-4.82491
ENSG00000140044	122953	JDP2	protein_coding	HGNC Symbol	8	Jun dimerization protein 2 [Source:HGNC Symbol;Acc:HGNC:17546]	-2.26164	-4.79537
ENSG00000099957	9127	P2RX6	protein_coding	HGNC Symbol	9	purinergic receptor P2X 6 [Source:HGNC Symbol;Acc:HGNC:8538]	-2.25488	-4.77294
ENSG00000136026	10970	CKAP4	protein_coding	HGNC Symbol	3	cytoskeleton associated protein 4 [Source:HGNC Symbol;Acc:HGNC:16991]	-2.24413	-4.73752
ENSG00000277152	NA	AC110048.2	lncRNA	Clone-based (Ensembl) gene	1	novel transcript	-2.24347	-4.73536
ENSG00000258725	NA	PRC1-AS1	lncRNA	HGNC Symbol	6	PRC1 antisense RNA 1 [Source:HGNC Symbol;Acc:HGNC:48587]	-2.24336	-4.73497
ENSG00000236333	NA	TRHDE-AS1	lncRNA	HGNC Symbol	24	TRHDE antisense RNA 1 [Source:HGNC Symbol;Acc:HGNC:27471]	-2.24305	-4.73397
ENSG00000152661	2697	GJA1	protein_coding	HGNC Symbol	4	gap junction protein alpha 1 [Source:HGNC Symbol;Acc:HGNC:4274]	-2.23985	-4.7235
ENSG00000110852	9976	CLEC2B	protein_coding	HGNC Symbol	4	C-type lectin domain family 2 member B [Source:HGNC Symbol;Acc:HGNC:2053]	-2.23957	-4.72257
ENSG00000259498	NA	TPM1-AS	lncRNA	HGNC Symbol	2	TPM1 antisense RNA [Source:HGNC Symbol;Acc:HGNC:53635]	-2.23896	-4.72056
ENSG00000142227	2014	EMP3	protein_coding	HGNC Symbol	9	epithelial membrane protein 3 [Source:HGNC Symbol;Acc:HGNC:3335]	-2.23795	-4.71728
ENSG00000108771	79132	DHX58	protein_coding	HGNC Symbol	8	DExH-box helicase 58 [Source:HGNC Symbol;Acc:HGNC:29517]	-2.23731	-4.71517
ENSG00000123500	1300	COL10A1	protein_coding	HGNC Symbol	5	collagen type X alpha 1 chain [Source:HGNC Symbol;Acc:HGNC:2185]	-2.23603	-4.71098
ENSG00000249850	NA	KRT18P31	processed_pseudogene	HGNC Symbol	1	keratin 18 pseudogene 31 [Source:HGNC Symbol;Acc:HGNC:33400]	-2.23497	-4.70754
ENSG00000272849	NA	AC084018.1	lncRNA	Clone-based (Ensembl) gene	1	novel transcript	-2.23468	-4.70658
ENSG00000227014	NA	AC007285.1	lncRNA	Clone-based (Ensembl) gene	2	novel transcript	-2.23135	-4.69574
ENSG00000043143	23338	JADE2	protein_coding	HGNC Symbol	11	jade family PHD finger 2 [Source:HGNC Symbol;Acc:HGNC:22984]	-2.23044	-4.69278
ENSG00000178685	84875	PARP10	protein_coding	HGNC Symbol	23	poly(ADP-ribose) polymerase family member 10 [Source:HGNC Symbol;Acc:HGNC:25895]	-2.22644	-4.67979
ENSG00000026103	355	FAS	protein_coding	HGNC Symbol	21	Fas cell surface death receptor [Source:HGNC Symbol;Acc:HGNC:11920]	-2.22619	-4.67898
ENSG00000204822	116540	MRPL53	protein_coding	HGNC Symbol	4	mitochondrial ribosomal protein L53 [Source:HGNC Symbol;Acc:HGNC:16684]	-2.22348	-4.6702
ENSG00000224976	NA	PARP4P2	unprocessed_pseudogene	HGNC Symbol	1	poly(ADP-ribose) polymerase family member 4 pseudogene 2 [Source:HGNC Symbol;Acc:HGNC:37760]	-2.21995	-4.65876
ENSG00000103888	57214	CEMIP	protein_coding	HGNC Symbol	6	cell migration inducing hyaluronidase 1 [Source:HGNC Symbol;Acc:HGNC:29213]	-2.21807	-4.65271
ENSG00000126860	2123	EVI2A	protein_coding	HGNC Symbol	3	ecotropic viral integration site 2A [Source:HGNC Symbol;Acc:HGNC:3499]	-2.21739	-4.65052
ENSG00000173068	54796	BNC2	protein_coding	HGNC Symbol	14	basonuclin 2 [Source:HGNC Symbol;Acc:HGNC:30988]	-2.21076	-4.62919
ENSG00000123388	3227	HOXC11	protein_coding	HGNC Symbol	2	homeobox C11 [Source:HGNC Symbol;Acc:HGNC:5123]	-2.20908	-4.62381
ENSG00000168936	92305	TMEM129	protein_coding	HGNC Symbol	6	transmembrane protein 129 [Source:HGNC Symbol;Acc:HGNC:25137]	-2.20893	-4.62332
ENSG00000107104	23189	KANK1	protein_coding	HGNC Symbol	11	KN motif and ankyrin repeat domains 1 [Source:HGNC Symbol;Acc:HGNC:19309]	-2.20751	-4.61877
ENSG00000175938	93129	ORAI3	protein_coding	HGNC Symbol	4	ORAI calcium release-activated calcium modulator 3 [Source:HGNC Symbol;Acc:HGNC:28185]	-2.20693	-4.61691
ENSG00000180914	5021	OXTR	protein_coding	HGNC Symbol	4	oxytocin receptor [Source:HGNC Symbol;Acc:HGNC:8529]	-2.20554	-4.61247
ENSG00000189184	54510	PCDH18	protein_coding	HGNC Symbol	8	protocadherin 18 [Source:HGNC Symbol;Acc:HGNC:14268]	-2.2027	-4.60341
ENSG00000221821	441150	C6orf226	protein_coding	HGNC Symbol	1	chromosome 6 open reading frame 226 [Source:HGNC Symbol;Acc:HGNC:34431]	-2.2025	-4.60278
ENSG00000102796	79758	DHRS12	protein_coding	HGNC Symbol	10	dehydrogenase/reductase 12 [Source:HGNC Symbol;Acc:HGNC:25832]	-2.20249	-4.60273
ENSG00000106484	4232	MEST	protein_coding	HGNC Symbol	17	mesoderm specific transcript [Source:HGNC Symbol;Acc:HGNC:7028]	-2.20214	-4.6016
ENSG00000253537	56108	PCDHGA7	protein_coding	HGNC Symbol	2	protocadherin gamma subfamily A, 7 [Source:HGNC Symbol;Acc:HGNC:8705]	-2.19696	-4.58512
ENSG00000182310	147650	SPACA6	protein_coding	HGNC Symbol	14	sperm acrosome associated 6 [Source:HGNC Symbol;Acc:HGNC:27113]	-2.19444	-4.57712
ENSG00000116774	56944	OLFML3	protein_coding	HGNC Symbol	5	olfactomedin like 3 [Source:HGNC Symbol;Acc:HGNC:24956]	-2.19164	-4.56825
ENSG00000255142	NA	AP006621.2	lncRNA	Clone-based (Ensembl) gene	1	novel transcript	-2.19008	-4.56332
ENSG00000162888	NA	C1orf147	lncRNA	HGNC Symbol	1	chromosome 1 open reading frame 147 [Source:HGNC Symbol;Acc:HGNC:32061]	-2.18981	-4.56247
ENSG00000103241	2294	FOXF1	protein_coding	HGNC Symbol	1	forkhead box F1 [Source:HGNC Symbol;Acc:HGNC:3809]	-2.18846	-4.55818
ENSG00000188042	10123	ARL4C	protein_coding	HGNC Symbol	2	ADP ribosylation factor like GTPase 4C [Source:HGNC Symbol;Acc:HGNC:698]	-2.18782	-4.55617
ENSG00000153253	6328	SCN3A	protein_coding	HGNC Symbol	12	sodium voltage-gated channel alpha subunit 3 [Source:HGNC Symbol;Acc:HGNC:10590]	-2.18614	-4.55088
ENSG00000183160	338773	TMEM119	protein_coding	HGNC Symbol	4	transmembrane protein 119 [Source:HGNC Symbol;Acc:HGNC:27884]	-2.18566	-4.54935
ENSG00000118308	4033	LRMP	protein_coding	HGNC Symbol	21	lymphoid restricted membrane protein [Source:HGNC Symbol;Acc:HGNC:6690]	-2.1849	-4.54695
ENSG00000169857	57099	AVEN	protein_coding	HGNC Symbol	3	apoptosis and caspase activation inhibitor [Source:HGNC Symbol;Acc:HGNC:13509]	-2.18425	-4.54491
ENSG00000132128	10489	LRRC41	protein_coding	HGNC Symbol	8	leucine rich repeat containing 41 [Source:HGNC Symbol;Acc:HGNC:16917]	-2.1831	-4.54129
ENSG00000273319	NA	AC058791.1	lncRNA	Clone-based (Ensembl) gene	1	novel transcript	-2.18285	-4.5405
ENSG00000164761	4982	TNFRSF11B	protein_coding	HGNC Symbol	3	TNF receptor superfamily member 11b [Source:HGNC Symbol;Acc:HGNC:11909]	-2.17558	-4.51767
ENSG00000140367	92912	UBE2Q2	protein_coding	HGNC Symbol	8	ubiquitin conjugating enzyme E2 Q2 [Source:HGNC Symbol;Acc:HGNC:19248]	-2.17546	-4.51729
ENSG00000087245	4313	MMP2	protein_coding	HGNC Symbol	8	matrix metallopeptidase 2 [Source:HGNC Symbol;Acc:HGNC:7166]	-2.17528	-4.51673
ENSG00000247746	158880	USP51	protein_coding	HGNC Symbol	2	ubiquitin specific peptidase 51 [Source:HGNC Symbol;Acc:HGNC:23086]	-2.17086	-4.50291
ENSG00000236467	NA	KCNMA1-AS1	lncRNA	HGNC Symbol	10	KCNMA1 antisense RNA 1 [Source:HGNC Symbol;Acc:HGNC:51213]	-2.17018	-4.50079
ENSG00000106868	64420	SUSD1	protein_coding	HGNC Symbol	10	sushi domain containing 1 [Source:HGNC Symbol;Acc:HGNC:25413]	-2.16828	-4.49486
ENSG00000163064	2019	EN1	protein_coding	HGNC Symbol	2	engrailed homeobox 1 [Source:HGNC Symbol;Acc:HGNC:3342]	-2.16396	-4.48142
ENSG00000179431	24147	FJX1	protein_coding	HGNC Symbol	2	four-jointed box kinase 1 [Source:HGNC Symbol;Acc:HGNC:17166]	-2.16385	-4.48109
ENSG00000105137	85360	SYDE1	protein_coding	HGNC Symbol	5	synapse defective Rho GTPase homolog 1 [Source:HGNC Symbol;Acc:HGNC:25824]	-2.15634	-4.45783
ENSG00000244171	NA	PBX2P1	processed_pseudogene	HGNC Symbol	1	PBX homeobox 2 pseudogene 1 [Source:HGNC Symbol;Acc:HGNC:8635]	-2.15604	-4.45691
ENSG00000220785	NA	MTMR9LP	transcribed_unprocessed_pseudogene	HGNC Symbol	4	myotubularin related protein 9 like, pseudogene [Source:HGNC Symbol;Acc:HGNC:27920]	-2.1532	-4.44814
ENSG00000229413	NA	AC018638.1	processed_pseudogene	Clone-based (Ensembl) gene	1	novel pseudogene	-2.15206	-4.44463
ENSG00000261326	NA	LINC01355	lncRNA	HGNC Symbol	6	long intergenic non-protein coding RNA 1355 [Source:HGNC Symbol;Acc:HGNC:50584]	-2.15163	-4.44329
ENSG00000176771	344148	NCKAP5	protein_coding	HGNC Symbol	9	NCK associated protein 5 [Source:HGNC Symbol;Acc:HGNC:29847]	-2.15109	-4.44163
ENSG00000165655	84858	ZNF503	protein_coding	HGNC Symbol	1	zinc finger protein 503 [Source:HGNC Symbol;Acc:HGNC:23589]	-2.15107	-4.44157
ENSG00000162804	25992	SNED1	protein_coding	HGNC Symbol	12	sushi, nidogen and EGF like domains 1 [Source:HGNC Symbol;Acc:HGNC:24696]	-2.14996	-4.43817
ENSG00000164308	64167	ERAP2	protein_coding	HGNC Symbol	11	endoplasmic reticulum aminopeptidase 2 [Source:HGNC Symbol;Acc:HGNC:29499]	-2.14029	-4.40849
ENSG00000166548	7084	TK2	protein_coding	HGNC Symbol	21	thymidine kinase 2 [Source:HGNC Symbol;Acc:HGNC:11831]	-2.13963	-4.40651
ENSG00000197461	5154	PDGFA	protein_coding	HGNC Symbol	6	platelet derived growth factor subunit A [Source:HGNC Symbol;Acc:HGNC:8799]	-2.13719	-4.39905
ENSG00000144642	27303	RBMS3	protein_coding	HGNC Symbol	20	RNA binding motif single stranded interacting protein 3 [Source:HGNC Symbol;Acc:HGNC:13427]	-2.1353	-4.39329
ENSG00000088448	55608	ANKRD10	protein_coding	HGNC Symbol	11	ankyrin repeat domain 10 [Source:HGNC Symbol;Acc:HGNC:20265]	-2.13207	-4.38347
ENSG00000136147	51131	PHF11	protein_coding	HGNC Symbol	18	PHD finger protein 11 [Source:HGNC Symbol;Acc:HGNC:17024]	-2.13035	-4.37823
ENSG00000166341	8642	DCHS1	protein_coding	HGNC Symbol	1	dachsous cadherin-related 1 [Source:HGNC Symbol;Acc:HGNC:13681]	-2.12985	-4.37672
ENSG00000179222	9500	MAGED1	protein_coding	HGNC Symbol	10	MAGE family member D1 [Source:HGNC Symbol;Acc:HGNC:6813]	-2.12639	-4.36622
ENSG00000131781	2330	FMO5	protein_coding	HGNC Symbol	9	flavin containing dimethylaniline monoxygenase 5 [Source:HGNC Symbol;Acc:HGNC:3773]	-2.12293	-4.35578
ENSG00000234664	NA	HMGN2P5	processed_pseudogene	HGNC Symbol	1	high mobility group nucleosomal binding domain 2 pseudogene 5 [Source:HGNC Symbol;Acc:HGNC:33568]	-2.12111	-4.35029
ENSG00000118257	8828	NRP2	protein_coding	HGNC Symbol	17	neuropilin 2 [Source:HGNC Symbol;Acc:HGNC:8005]	-2.11674	-4.33713
ENSG00000099974	100037417	DDTL	protein_coding	HGNC Symbol	1	D-dopachrome tautomerase like [Source:HGNC Symbol;Acc:HGNC:33446]	-2.11548	-4.33333
ENSG00000143995	4211	MEIS1	protein_coding	HGNC Symbol	17	Meis homeobox 1 [Source:HGNC Symbol;Acc:HGNC:7000]	-2.11418	-4.32944
ENSG00000151612	152485	ZNF827	protein_coding	HGNC Symbol	22	zinc finger protein 827 [Source:HGNC Symbol;Acc:HGNC:27193]	-2.11409	-4.32917
ENSG00000164920	116039	OSR2	protein_coding	HGNC Symbol	10	odd-skipped related transciption factor 2 [Source:HGNC Symbol;Acc:HGNC:15830]	-2.11351	-4.32742
ENSG00000004776	126393	HSPB6	protein_coding	HGNC Symbol	3	heat shock protein family B (small) member 6 [Source:HGNC Symbol;Acc:HGNC:26511]	-2.11117	-4.32041
ENSG00000108846	8714	ABCC3	protein_coding	HGNC Symbol	18	ATP binding cassette subfamily C member 3 [Source:HGNC Symbol;Acc:HGNC:54]	-2.10742	-4.30919
ENSG00000053108	23105	FSTL4	protein_coding	HGNC Symbol	7	follistatin like 4 [Source:HGNC Symbol;Acc:HGNC:21389]	-2.10577	-4.30427
ENSG00000071967	79901	CYBRD1	protein_coding	HGNC Symbol	7	cytochrome b reductase 1 [Source:HGNC Symbol;Acc:HGNC:20797]	-2.10413	-4.29939
ENSG00000180891	404093	CUEDC1	protein_coding	HGNC Symbol	13	CUE domain containing 1 [Source:HGNC Symbol;Acc:HGNC:31350]	-2.09954	-4.28572
ENSG00000156804	114907	FBXO32	protein_coding	HGNC Symbol	6	F-box protein 32 [Source:HGNC Symbol;Acc:HGNC:16731]	-2.09915	-4.28458
ENSG00000269867	NA	AC010326.3	lncRNA	Clone-based (Ensembl) gene	1	novel transcript, sense intronic to ZNF814	-2.09825	-4.28191
ENSG00000222014	84084	RAB6C	protein_coding	HGNC Symbol	1	RAB6C, member RAS oncogene family [Source:HGNC Symbol;Acc:HGNC:16525]	-2.09583	-4.27471
ENSG00000183562	NA	AC131971.1	lncRNA	Clone-based (Ensembl) gene	1	novel transcript, antisense to NAP1L4	-2.09535	-4.2733
ENSG00000082497	56256	SERTAD4	protein_coding	HGNC Symbol	4	SERTA domain containing 4 [Source:HGNC Symbol;Acc:HGNC:25236]	-2.09458	-4.27102
ENSG00000113361	1004	CDH6	protein_coding	HGNC Symbol	5	cadherin 6 [Source:HGNC Symbol;Acc:HGNC:1765]	-2.09141	-4.26166
ENSG00000204941	5673	PSG5	protein_coding	HGNC Symbol	11	pregnancy specific beta-1-glycoprotein 5 [Source:HGNC Symbol;Acc:HGNC:9522]	-2.0881	-4.25188
ENSG00000123080	1031	CDKN2C	protein_coding	HGNC Symbol	3	cyclin dependent kinase inhibitor 2C [Source:HGNC Symbol;Acc:HGNC:1789]	-2.08795	-4.25142
ENSG00000138944	85352	SHISAL1	protein_coding	HGNC Symbol	1	shisa like 1 [Source:HGNC Symbol;Acc:HGNC:29335]	-2.08387	-4.23944
ENSG00000206417	NA	H1FX-AS1	lncRNA	HGNC Symbol	4	H1FX antisense RNA 1 [Source:HGNC Symbol;Acc:HGNC:27953]	-2.08145	-4.23234
ENSG00000120278	57480	PLEKHG1	protein_coding	HGNC Symbol	8	pleckstrin homology and RhoGEF domain containing G1 [Source:HGNC Symbol;Acc:HGNC:20884]	-2.07169	-4.20378
ENSG00000164038	133308	SLC9B2	protein_coding	HGNC Symbol	11	solute carrier family 9 member B2 [Source:HGNC Symbol;Acc:HGNC:25143]	-2.07136	-4.20283
ENSG00000145349	817	CAMK2D	protein_coding	HGNC Symbol	14	calcium/calmodulin dependent protein kinase II delta [Source:HGNC Symbol;Acc:HGNC:1462]	-2.07131	-4.20269
ENSG00000196628	6925	TCF4	protein_coding	HGNC Symbol	90	transcription factor 4 [Source:HGNC Symbol;Acc:HGNC:11634]	-2.07121	-4.20239
ENSG00000156535	135228	CD109	protein_coding	HGNC Symbol	5	CD109 molecule [Source:HGNC Symbol;Acc:HGNC:21685]	-2.0666	-4.18899
ENSG00000277224	8343	H2BC7	protein_coding	HGNC Symbol	1	H2B clustered histone 7 [Source:HGNC Symbol;Acc:HGNC:4752]	-2.06501	-4.18436
ENSG00000114251	7474	WNT5A	protein_coding	HGNC Symbol	7	Wnt family member 5A [Source:HGNC Symbol;Acc:HGNC:12784]	-2.06397	-4.18136
ENSG00000171951	7857	SCG2	protein_coding	HGNC Symbol	3	secretogranin II [Source:HGNC Symbol;Acc:HGNC:10575]	-2.06294	-4.17836
ENSG00000044090	9820	CUL7	protein_coding	HGNC Symbol	8	cullin 7 [Source:HGNC Symbol;Acc:HGNC:21024]	-2.06252	-4.17714
ENSG00000164039	56898	BDH2	protein_coding	HGNC Symbol	9	3-hydroxybutyrate dehydrogenase 2 [Source:HGNC Symbol;Acc:HGNC:32389]	-2.06241	-4.17682
ENSG00000145934	57451	TENM2	protein_coding	HGNC Symbol	9	teneurin transmembrane protein 2 [Source:HGNC Symbol;Acc:HGNC:29943]	-2.06008	-4.17011
ENSG00000026950	11119	BTN3A1	protein_coding	HGNC Symbol	11	butyrophilin subfamily 3 member A1 [Source:HGNC Symbol;Acc:HGNC:1138]	-2.06	-4.16986
ENSG00000149256	26011	TENM4	protein_coding	HGNC Symbol	11	teneurin transmembrane protein 4 [Source:HGNC Symbol;Acc:HGNC:29945]	-2.05887	-4.1666
ENSG00000226312	NA	CFLAR-AS1	lncRNA	HGNC Symbol	23	CFLAR antisense RNA 1 [Source:HGNC Symbol;Acc:HGNC:14437]	-2.05886	-4.16658
ENSG00000184363	11187	PKP3	protein_coding	HGNC Symbol	11	plakophilin 3 [Source:HGNC Symbol;Acc:HGNC:9025]	-2.0582	-4.16466
ENSG00000168497	8436	CAVIN2	protein_coding	HGNC Symbol	1	caveolae associated protein 2 [Source:HGNC Symbol;Acc:HGNC:10690]	-2.05415	-4.15298
ENSG00000103490	29108	PYCARD	protein_coding	HGNC Symbol	4	PYD and CARD domain containing [Source:HGNC Symbol;Acc:HGNC:16608]	-2.05336	-4.15072
ENSG00000124006	23363	OBSL1	protein_coding	HGNC Symbol	15	obscurin like cytoskeletal adaptor 1 [Source:HGNC Symbol;Acc:HGNC:29092]	-2.0523	-4.14766
ENSG00000198715	112770	GLMP	protein_coding	HGNC Symbol	16	glycosylated lysosomal membrane protein [Source:HGNC Symbol;Acc:HGNC:29436]	-2.05163	-4.14573
ENSG00000142303	81794	ADAMTS10	protein_coding	HGNC Symbol	14	ADAM metallopeptidase with thrombospondin type 1 motif 10 [Source:HGNC Symbol;Acc:HGNC:13201]	-2.04971	-4.14022
ENSG00000244578	NA	LINC01391	lncRNA	HGNC Symbol	3	long intergenic non-protein coding RNA 1391 [Source:HGNC Symbol;Acc:HGNC:50666]	-2.04856	-4.13694
ENSG00000183098	10082	GPC6	protein_coding	HGNC Symbol	2	glypican 6 [Source:HGNC Symbol;Acc:HGNC:4454]	-2.04783	-4.13485
ENSG00000133110	10631	POSTN	protein_coding	HGNC Symbol	10	periostin [Source:HGNC Symbol;Acc:HGNC:16953]	-2.04703	-4.13254
ENSG00000138172	51063	CALHM2	protein_coding	HGNC Symbol	7	calcium homeostasis modulator family member 2 [Source:HGNC Symbol;Acc:HGNC:23493]	-2.04654	-4.13113
ENSG00000164125	51313	GASK1B	protein_coding	HGNC Symbol	9	golgi associated kinase 1B [Source:HGNC Symbol;Acc:HGNC:25312]	-2.04434	-4.12485
ENSG00000112773	55603	TENT5A	protein_coding	HGNC Symbol	5	terminal nucleotidyltransferase 5A [Source:HGNC Symbol;Acc:HGNC:18345]	-2.04342	-4.12222
ENSG00000259571	414899	BLID	protein_coding	HGNC Symbol	1	BH3-like motif containing, cell death inducer [Source:HGNC Symbol;Acc:HGNC:33495]	-2.042	-4.11817
ENSG00000179981	10194	TSHZ1	protein_coding	HGNC Symbol	5	teashirt zinc finger homeobox 1 [Source:HGNC Symbol;Acc:HGNC:10669]	-2.04131	-4.1162
ENSG00000187391	9863	MAGI2	protein_coding	HGNC Symbol	42	membrane associated guanylate kinase, WW and PDZ domain containing 2 [Source:HGNC Symbol;Acc:HGNC:18957]	-2.03754	-4.10545
ENSG00000143772	3707	ITPKB	protein_coding	HGNC Symbol	3	inositol-trisphosphate 3-kinase B [Source:HGNC Symbol;Acc:HGNC:6179]	-2.03483	-4.09775
ENSG00000276141	NA	WHAMMP3	transcribed_unprocessed_pseudogene	HGNC Symbol	4	WAS protein homolog associated with actin, golgi membranes and microtubules pseudogene 3 [Source:HGNC Symbol;Acc:HGNC:27892]	-2.03309	-4.0928
ENSG00000134853	5156	PDGFRA	protein_coding	HGNC Symbol	10	platelet derived growth factor receptor alpha [Source:HGNC Symbol;Acc:HGNC:8803]	-2.03234	-4.09068
ENSG00000230426	NA	ERVMER61-1	lncRNA	HGNC Symbol	17	endogenous retrovirus group MER61 member 1 [Source:HGNC Symbol;Acc:HGNC:27919]	-2.03192	-4.08949
ENSG00000184227	641371	ACOT1	protein_coding	HGNC Symbol	2	acyl-CoA thioesterase 1 [Source:HGNC Symbol;Acc:HGNC:33128]	-2.03187	-4.08933
ENSG00000110237	9828	ARHGEF17	protein_coding	HGNC Symbol	7	Rho guanine nucleotide exchange factor 17 [Source:HGNC Symbol;Acc:HGNC:21726]	-2.03094	-4.08671
ENSG00000151876	26272	FBXO4	protein_coding	HGNC Symbol	7	F-box protein 4 [Source:HGNC Symbol;Acc:HGNC:13583]	-2.0291	-4.0815
ENSG00000137449	132864	CPEB2	protein_coding	HGNC Symbol	8	cytoplasmic polyadenylation element binding protein 2 [Source:HGNC Symbol;Acc:HGNC:21745]	-2.02728	-4.07636
ENSG00000187243	81557	MAGED4B	protein_coding	HGNC Symbol	12	MAGE family member D4B [Source:HGNC Symbol;Acc:HGNC:22880]	-2.02454	-4.06862
ENSG00000182095	84629	TNRC18	protein_coding	HGNC Symbol	10	trinucleotide repeat containing 18 [Source:HGNC Symbol;Acc:HGNC:11962]	-2.02375	-4.06639
ENSG00000213614	3073	HEXA	protein_coding	HGNC Symbol	16	hexosaminidase subunit alpha [Source:HGNC Symbol;Acc:HGNC:4878]	-2.0235	-4.06568
ENSG00000244586	NA	WNT5A-AS1	lncRNA	HGNC Symbol	1	WNT5A antisense RNA 1 [Source:HGNC Symbol;Acc:HGNC:40616]	-2.02347	-4.06561
ENSG00000224821	100129836	COL4A2-AS2	lncRNA	HGNC Symbol	1	COL4A2 antisense 2 [Source:HGNC Symbol;Acc:HGNC:39849]	-2.01579	-4.04403
ENSG00000120820	83468	GLT8D2	protein_coding	HGNC Symbol	7	glycosyltransferase 8 domain containing 2 [Source:HGNC Symbol;Acc:HGNC:24890]	-2.01552	-4.04327
ENSG00000198774	9182	RASSF9	protein_coding	HGNC Symbol	1	Ras association domain family member 9 [Source:HGNC Symbol;Acc:HGNC:15739]	-2.01256	-4.03496
ENSG00000127863	55504	TNFRSF19	protein_coding	HGNC Symbol	5	TNF receptor superfamily member 19 [Source:HGNC Symbol;Acc:HGNC:11915]	-2.01128	-4.03139
ENSG00000205885	NA	C1RL-AS1	lncRNA	HGNC Symbol	5	C1RL antisense RNA 1 [Source:HGNC Symbol;Acc:HGNC:27461]	-2.0096	-4.0267
ENSG00000156475	5521	PPP2R2B	protein_coding	HGNC Symbol	21	protein phosphatase 2 regulatory subunit Bbeta [Source:HGNC Symbol;Acc:HGNC:9305]	-2.00764	-4.02123
ENSG00000138738	11107	PRDM5	protein_coding	HGNC Symbol	12	PR/SET domain 5 [Source:HGNC Symbol;Acc:HGNC:9349]	-2.00673	-4.01869
ENSG00000254122	56099	PCDHGB7	protein_coding	HGNC Symbol	2	protocadherin gamma subfamily B, 7 [Source:HGNC Symbol;Acc:HGNC:8714]	-2.00496	-4.01378
ENSG00000140396	10499	NCOA2	protein_coding	HGNC Symbol	8	nuclear receptor coactivator 2 [Source:HGNC Symbol;Acc:HGNC:7669]	-2.00342	-4.00949
ENSG00000176857	NA	GJA1P1	processed_pseudogene	HGNC Symbol	1	gap junction protein alpha 1 pseudogene 1 [Source:HGNC Symbol;Acc:HGNC:4275]	-2.00139	-4.00385
ENSG00000152049	23704	KCNE4	protein_coding	HGNC Symbol	2	potassium voltage-gated channel subfamily E regulatory subunit 4 [Source:HGNC Symbol;Acc:HGNC:6244]	-2.00039	-4.00108
ENSG00000002726	26	AOC1	protein_coding	HGNC Symbol	7	amine oxidase copper containing 1 [Source:HGNC Symbol;Acc:HGNC:80]	2.00025	4.0007
ENSG00000182791	55231	CCDC87	protein_coding	HGNC Symbol	1	coiled-coil domain containing 87 [Source:HGNC Symbol;Acc:HGNC:25579]	2.00033	4.00092
ENSG00000167840	7775	ZNF232	protein_coding	HGNC Symbol	8	zinc finger protein 232 [Source:HGNC Symbol;Acc:HGNC:13026]	2.00069	4.00192
ENSG00000154175	25890	ABI3BP	protein_coding	HGNC Symbol	28	ABI family member 3 binding protein [Source:HGNC Symbol;Acc:HGNC:17265]	2.00481	4.01335
ENSG00000249996	NA	PPIC-AS1	lncRNA	HGNC Symbol	1	PPIC antisense RNA 1 [Source:HGNC Symbol;Acc:HGNC:40464]	2.01078	4.03
ENSG00000198435	441478	NRARP	protein_coding	HGNC Symbol	1	NOTCH regulated ankyrin repeat protein [Source:HGNC Symbol;Acc:HGNC:33843]	2.01101	4.03065
ENSG00000188559	57186	RALGAPA2	protein_coding	HGNC Symbol	6	Ral GTPase activating protein catalytic subunit alpha 2 [Source:HGNC Symbol;Acc:HGNC:16207]	2.01605	4.04476
ENSG00000204257	3108	HLA-DMA	protein_coding	HGNC Symbol	9	major histocompatibility complex, class II, DM alpha [Source:HGNC Symbol;Acc:HGNC:4934]	2.01643	4.04582
ENSG00000102048	140462	ASB9	protein_coding	HGNC Symbol	9	ankyrin repeat and SOCS box containing 9 [Source:HGNC Symbol;Acc:HGNC:17184]	2.01654	4.04611
ENSG00000154258	10350	ABCA9	protein_coding	HGNC Symbol	8	ATP binding cassette subfamily A member 9 [Source:HGNC Symbol;Acc:HGNC:39]	2.01755	4.04897
ENSG00000205592	283463	MUC19	protein_coding	HGNC Symbol	11	mucin 19, oligomeric [Source:HGNC Symbol;Acc:HGNC:14362]	2.01816	4.05068
ENSG00000154118	57338	JPH3	protein_coding	HGNC Symbol	4	junctophilin 3 [Source:HGNC Symbol;Acc:HGNC:14203]	2.0182	4.05078
ENSG00000162722	25893	TRIM58	protein_coding	HGNC Symbol	1	tripartite motif containing 58 [Source:HGNC Symbol;Acc:HGNC:24150]	2.01843	4.05143
ENSG00000127824	7277	TUBA4A	protein_coding	HGNC Symbol	10	tubulin alpha 4a [Source:HGNC Symbol;Acc:HGNC:12407]	2.01932	4.05392
ENSG00000267980	NA	AC007292.1	lncRNA	Clone-based (Ensembl) gene	1	novel transcript, antisense to SH3GL1	2.01986	4.05545
ENSG00000275763	NA	ZNF516-DT	lncRNA	HGNC Symbol	1	ZNF516 divergent transcript [Source:HGNC Symbol;Acc:HGNC:51248]	2.02228	4.06227
ENSG00000115109	57669	EPB41L5	protein_coding	HGNC Symbol	10	erythrocyte membrane protein band 4.1 like 5 [Source:HGNC Symbol;Acc:HGNC:19819]	2.02318	4.06479
ENSG00000204531	5460	POU5F1	protein_coding	HGNC Symbol	8	POU class 5 homeobox 1 [Source:HGNC Symbol;Acc:HGNC:9221]	2.02403	4.06719
ENSG00000164400	1437	CSF2	protein_coding	HGNC Symbol	1	colony stimulating factor 2 [Source:HGNC Symbol;Acc:HGNC:2434]	2.02492	4.0697
ENSG00000130037	3741	KCNA5	protein_coding	HGNC Symbol	1	potassium voltage-gated channel subfamily A member 5 [Source:HGNC Symbol;Acc:HGNC:6224]	2.02539	4.07102
ENSG00000164683	23462	HEY1	protein_coding	HGNC Symbol	15	hes related family bHLH transcription factor with YRPW motif 1 [Source:HGNC Symbol;Acc:HGNC:4880]	2.02793	4.07818
ENSG00000100564	5283	PIGH	protein_coding	HGNC Symbol	12	phosphatidylinositol glycan anchor biosynthesis class H [Source:HGNC Symbol;Acc:HGNC:8964]	2.02891	4.08098
ENSG00000127152	64919	BCL11B	protein_coding	HGNC Symbol	3	BAF chromatin remodeling complex subunit BCL11B [Source:HGNC Symbol;Acc:HGNC:13222]	2.02975	4.08335
ENSG00000233817	NA	AL162727.1	lncRNA	Clone-based (Ensembl) gene	1	novel transcript	2.03541	4.09939
ENSG00000234028	NA	EIF2AK3-DT	lncRNA	HGNC Symbol	2	EIF2AK3 divergent transcript [Source:HGNC Symbol;Acc:HGNC:54066]	2.03562	4.09999
ENSG00000104177	50804	MYEF2	protein_coding	HGNC Symbol	17	myelin expression factor 2 [Source:HGNC Symbol;Acc:HGNC:17940]	2.03664	4.1029
ENSG00000015133	440193	CCDC88C	protein_coding	HGNC Symbol	14	coiled-coil domain containing 88C [Source:HGNC Symbol;Acc:HGNC:19967]	2.03689	4.1036
ENSG00000182912	NA	TSPEAR-AS2	lncRNA	HGNC Symbol	3	TSPEAR antisense RNA 2 [Source:HGNC Symbol;Acc:HGNC:16428]	2.03842	4.10795
ENSG00000186704	NA	DTX2P1	transcribed_unprocessed_pseudogene	HGNC Symbol	1	DTX2 pseudogene 1 [Source:HGNC Symbol;Acc:HGNC:42352]	2.03969	4.11157
ENSG00000172292	253782	CERS6	protein_coding	HGNC Symbol	2	ceramide synthase 6 [Source:HGNC Symbol;Acc:HGNC:23826]	2.0408	4.11475
ENSG00000137474	4647	MYO7A	protein_coding	HGNC Symbol	14	myosin VIIA [Source:HGNC Symbol;Acc:HGNC:7606]	2.0423	4.119
ENSG00000161921	58191	CXCL16	protein_coding	HGNC Symbol	6	C-X-C motif chemokine ligand 16 [Source:HGNC Symbol;Acc:HGNC:16642]	2.04358	4.12267
ENSG00000204301	4855	NOTCH4	protein_coding	HGNC Symbol	5	notch receptor 4 [Source:HGNC Symbol;Acc:HGNC:7884]	2.04591	4.12933
ENSG00000240535	NA	AC034238.2	lncRNA	Clone-based (Ensembl) gene	15	novel transcript, antisense to GZMK	2.04731	4.13334
ENSG00000114631	50512	PODXL2	protein_coding	HGNC Symbol	1	podocalyxin like 2 [Source:HGNC Symbol;Acc:HGNC:17936]	2.04759	4.13414
ENSG00000115604	8809	IL18R1	protein_coding	HGNC Symbol	5	interleukin 18 receptor 1 [Source:HGNC Symbol;Acc:HGNC:5988]	2.04772	4.13452
ENSG00000234380	NA	LINC01426	lncRNA	HGNC Symbol	3	long intergenic non-protein coding RNA 1426 [Source:HGNC Symbol;Acc:HGNC:50734]	2.05059	4.14274
ENSG00000175832	2118	ETV4	protein_coding	HGNC Symbol	11	ETS variant transcription factor 4 [Source:HGNC Symbol;Acc:HGNC:3493]	2.05242	4.14802
ENSG00000129910	1013	CDH15	protein_coding	HGNC Symbol	3	cadherin 15 [Source:HGNC Symbol;Acc:HGNC:1754]	2.0547	4.15457
ENSG00000172020	2596	GAP43	protein_coding	HGNC Symbol	2	growth associated protein 43 [Source:HGNC Symbol;Acc:HGNC:4140]	2.05632	4.15924
ENSG00000176593	NA	AC008969.1	lncRNA	Clone-based (Ensembl) gene	9	novel transcript, antisense to ZNF606	2.0564	4.15947
ENSG00000247400	NA	DNAJC3-DT	lncRNA	HGNC Symbol	4	DNAJC3 divergent transcript [Source:HGNC Symbol;Acc:HGNC:39808]	2.05714	4.16161
ENSG00000071282	29995	LMCD1	protein_coding	HGNC Symbol	7	LIM and cysteine rich domains 1 [Source:HGNC Symbol;Acc:HGNC:6633]	2.05715	4.16162
ENSG00000196569	3908	LAMA2	protein_coding	HGNC Symbol	7	laminin subunit alpha 2 [Source:HGNC Symbol;Acc:HGNC:6482]	2.05858	4.16577
ENSG00000154146	4900	NRGN	protein_coding	HGNC Symbol	2	neurogranin [Source:HGNC Symbol;Acc:HGNC:8000]	2.06369	4.18053
ENSG00000072071	22859	ADGRL1	protein_coding	HGNC Symbol	8	adhesion G protein-coupled receptor L1 [Source:HGNC Symbol;Acc:HGNC:20973]	2.06384	4.18096
ENSG00000163449	92691	TMEM169	protein_coding	HGNC Symbol	6	transmembrane protein 169 [Source:HGNC Symbol;Acc:HGNC:25130]	2.06396	4.18131
ENSG00000171860	719	C3AR1	protein_coding	HGNC Symbol	2	complement C3a receptor 1 [Source:HGNC Symbol;Acc:HGNC:1319]	2.06679	4.18953
ENSG00000183775	57528	KCTD16	protein_coding	HGNC Symbol	2	potassium channel tetramerization domain containing 16 [Source:HGNC Symbol;Acc:HGNC:29244]	2.069	4.19594
ENSG00000174669	3177	SLC29A2	protein_coding	HGNC Symbol	7	solute carrier family 29 member 2 [Source:HGNC Symbol;Acc:HGNC:11004]	2.06962	4.19775
ENSG00000059915	5662	PSD	protein_coding	HGNC Symbol	9	pleckstrin and Sec7 domain containing [Source:HGNC Symbol;Acc:HGNC:9507]	2.07181	4.20414
ENSG00000225151	NA	GOLGA2P7	transcribed_unprocessed_pseudogene	HGNC Symbol	10	GOLGA2 pseudogene 7 [Source:HGNC Symbol;Acc:HGNC:49516]	2.07199	4.20466
ENSG00000208892	NA	SNORA49	snoRNA	HGNC Symbol	1	small nucleolar RNA, H/ACA box 49 [Source:HGNC Symbol;Acc:HGNC:32642]	2.0726	4.20643
ENSG00000169684	1138	CHRNA5	protein_coding	HGNC Symbol	4	cholinergic receptor nicotinic alpha 5 subunit [Source:HGNC Symbol;Acc:HGNC:1959]	2.07482	4.21291
ENSG00000154127	84959	UBASH3B	protein_coding	HGNC Symbol	8	ubiquitin associated and SH3 domain containing B [Source:HGNC Symbol;Acc:HGNC:29884]	2.07509	4.21371
ENSG00000141198	10040	TOM1L1	protein_coding	HGNC Symbol	23	target of myb1 like 1 membrane trafficking protein [Source:HGNC Symbol;Acc:HGNC:11983]	2.07683	4.2188
ENSG00000169752	145957	NRG4	protein_coding	HGNC Symbol	16	neuregulin 4 [Source:HGNC Symbol;Acc:HGNC:29862]	2.07788	4.22185
ENSG00000250007	NA	AC087457.1	lncRNA	Clone-based (Ensembl) gene	4	novel transcript, antisense to ACTC1	2.07999	4.22803
ENSG00000197915	388697	HRNR	protein_coding	HGNC Symbol	1	hornerin [Source:HGNC Symbol;Acc:HGNC:20846]	2.08068	4.23005
ENSG00000205336	9289	ADGRG1	protein_coding	HGNC Symbol	79	adhesion G protein-coupled receptor G1 [Source:HGNC Symbol;Acc:HGNC:4512]	2.08292	4.23663
ENSG00000166473	114780	PKD1L2	polymorphic_pseudogene	HGNC Symbol	12	polycystin 1 like 2 (gene/pseudogene) [Source:HGNC Symbol;Acc:HGNC:21715]	2.08487	4.24237
ENSG00000237310	NA	AC008267.5	lncRNA	Clone-based (Ensembl) gene	6	novel transcript	2.08517	4.24326
ENSG00000135426	9840	TESPA1	protein_coding	HGNC Symbol	14	thymocyte expressed, positive selection associated 1 [Source:HGNC Symbol;Acc:HGNC:29109]	2.08722	4.2493
ENSG00000130787	9026	HIP1R	protein_coding	HGNC Symbol	10	huntingtin interacting protein 1 related [Source:HGNC Symbol;Acc:HGNC:18415]	2.08798	4.25152
ENSG00000143434	10500	SEMA6C	protein_coding	HGNC Symbol	10	semaphorin 6C [Source:HGNC Symbol;Acc:HGNC:10740]	2.08983	4.25699
ENSG00000215861	NA	AC245297.1	transcribed_unprocessed_pseudogene	Clone-based (Ensembl) gene	2	phosphodiesterase 4D interacting protein (myomegalin) (PDE4DIP) pseudogene	2.09108	4.26067
ENSG00000269997	NA	AC068790.3	lncRNA	Clone-based (Ensembl) gene	1	novel transcript, sense intronic to CCDC92	2.09135	4.26147
ENSG00000145990	54438	GFOD1	protein_coding	HGNC Symbol	6	glucose-fructose oxidoreductase domain containing 1 [Source:HGNC Symbol;Acc:HGNC:21096]	2.09233	4.26435
ENSG00000183018	124976	SPNS2	protein_coding	HGNC Symbol	8	sphingolipid transporter 2 [Source:HGNC Symbol;Acc:HGNC:26992]	2.0924	4.26458
ENSG00000267279	NA	AC090409.1	lncRNA	Clone-based (Ensembl) gene	3	novel transcript	2.09275	4.26559
ENSG00000016864	55830	GLT8D1	protein_coding	HGNC Symbol	15	glycosyltransferase 8 domain containing 1 [Source:HGNC Symbol;Acc:HGNC:24870]	2.0928	4.26575
ENSG00000126218	2159	F10	protein_coding	HGNC Symbol	7	coagulation factor X [Source:HGNC Symbol;Acc:HGNC:3528]	2.09573	4.27442
ENSG00000171219	55561	CDC42BPG	protein_coding	HGNC Symbol	4	CDC42 binding protein kinase gamma [Source:HGNC Symbol;Acc:HGNC:29829]	2.09694	4.278
ENSG00000188996	135458	HUS1B	protein_coding	HGNC Symbol	1	HUS1 checkpoint clamp component B [Source:HGNC Symbol;Acc:HGNC:16485]	2.09874	4.28336
ENSG00000214595	400954	EML6	protein_coding	HGNC Symbol	15	EMAP like 6 [Source:HGNC Symbol;Acc:HGNC:35412]	2.1025	4.29454
ENSG00000152669	10309	CCNO	protein_coding	HGNC Symbol	2	cyclin O [Source:HGNC Symbol;Acc:HGNC:18576]	2.1049	4.30168
ENSG00000105048	7138	TNNT1	protein_coding	HGNC Symbol	17	troponin T1, slow skeletal type [Source:HGNC Symbol;Acc:HGNC:11948]	2.10534	4.303
ENSG00000131650	79412	KREMEN2	protein_coding	HGNC Symbol	6	kringle containing transmembrane protein 2 [Source:HGNC Symbol;Acc:HGNC:18797]	2.10665	4.3069
ENSG00000103196	83716	CRISPLD2	protein_coding	HGNC Symbol	11	cysteine rich secretory protein LCCL domain containing 2 [Source:HGNC Symbol;Acc:HGNC:25248]	2.11041	4.31814
ENSG00000231762	NA	AL590426.1	processed_pseudogene	Clone-based (Ensembl) gene	1	novel pseudogene	2.11102	4.31996
ENSG00000141431	80816	ASXL3	protein_coding	HGNC Symbol	15	ASXL transcriptional regulator 3 [Source:HGNC Symbol;Acc:HGNC:29357]	2.11773	4.3401
ENSG00000080709	3781	KCNN2	protein_coding	HGNC Symbol	11	potassium calcium-activated channel subfamily N member 2 [Source:HGNC Symbol;Acc:HGNC:6291]	2.11789	4.34059
ENSG00000170927	5314	PKHD1	protein_coding	HGNC Symbol	2	PKHD1 ciliary IPT domain containing fibrocystin/polyductin [Source:HGNC Symbol;Acc:HGNC:9016]	2.11934	4.34494
ENSG00000153558	25827	FBXL2	protein_coding	HGNC Symbol	21	F-box and leucine rich repeat protein 2 [Source:HGNC Symbol;Acc:HGNC:13598]	2.12278	4.35534
ENSG00000143036	126969	SLC44A3	protein_coding	HGNC Symbol	10	solute carrier family 44 member 3 [Source:HGNC Symbol;Acc:HGNC:28689]	2.12474	4.36124
ENSG00000101265	9770	RASSF2	protein_coding	HGNC Symbol	3	Ras association domain family member 2 [Source:HGNC Symbol;Acc:HGNC:9883]	2.12486	4.3616
ENSG00000198286	84433	CARD11	protein_coding	HGNC Symbol	4	caspase recruitment domain family member 11 [Source:HGNC Symbol;Acc:HGNC:16393]	2.1253	4.36294
ENSG00000257135	NA	ODC1-DT	lncRNA	HGNC Symbol	5	ODC1 divergent transcript [Source:HGNC Symbol;Acc:HGNC:54070]	2.12577	4.36436
ENSG00000170417	130827	TMEM182	protein_coding	HGNC Symbol	11	transmembrane protein 182 [Source:HGNC Symbol;Acc:HGNC:26391]	2.12785	4.37067
ENSG00000102996	4324	MMP15	protein_coding	HGNC Symbol	2	matrix metallopeptidase 15 [Source:HGNC Symbol;Acc:HGNC:7161]	2.12967	4.37617
ENSG00000254482	NA	AP003102.1	processed_pseudogene	Clone-based (Ensembl) gene	1	chaperonin containing TCP1, subunit 6A (zeta 1) (CCT6A) pseudogene	2.13	4.37719
ENSG00000127585	146330	FBXL16	protein_coding	HGNC Symbol	5	F-box and leucine rich repeat protein 16 [Source:HGNC Symbol;Acc:HGNC:14150]	2.1316	4.38204
ENSG00000229981	NA	LINC01435	lncRNA	HGNC Symbol	25	long intergenic non-protein coding RNA 1435 [Source:HGNC Symbol;Acc:HGNC:50753]	2.13404	4.38945
ENSG00000258405	147660	ZNF578	protein_coding	HGNC Symbol	2	zinc finger protein 578 [Source:HGNC Symbol;Acc:HGNC:26449]	2.13419	4.38992
ENSG00000099994	56241	SUSD2	protein_coding	HGNC Symbol	2	sushi domain containing 2 [Source:HGNC Symbol;Acc:HGNC:30667]	2.13744	4.39981
ENSG00000197594	5167	ENPP1	protein_coding	HGNC Symbol	8	ectonucleotide pyrophosphatase/phosphodiesterase 1 [Source:HGNC Symbol;Acc:HGNC:3356]	2.14556	4.42465
ENSG00000149633	85449	KIAA1755	protein_coding	HGNC Symbol	7	KIAA1755 [Source:HGNC Symbol;Acc:HGNC:29372]	2.14772	4.43127
ENSG00000179855	126326	GIPC3	protein_coding	HGNC Symbol	2	GIPC PDZ domain containing family member 3 [Source:HGNC Symbol;Acc:HGNC:18183]	2.15022	4.43895
ENSG00000244513	NA	AC109587.1	lncRNA	Clone-based (Ensembl) gene	13	novel transcript	2.15051	4.43986
ENSG00000232811	NA	AL360270.1	lncRNA	Clone-based (Ensembl) gene	1	novel transcript	2.15064	4.44026
ENSG00000153363	NA	LINC00467	lncRNA	HGNC Symbol	27	long intergenic non-protein coding RNA 467 [Source:HGNC Symbol;Acc:HGNC:28227]	2.15752	4.46147
ENSG00000092421	57556	SEMA6A	protein_coding	HGNC Symbol	15	semaphorin 6A [Source:HGNC Symbol;Acc:HGNC:10738]	2.15891	4.46579
ENSG00000230185	NA	C9orf147	lncRNA	HGNC Symbol	5	chromosome 9 open reading frame 147 [Source:HGNC Symbol;Acc:HGNC:31438]	2.15953	4.46768
ENSG00000217404	NA	RPS4XP9	processed_pseudogene	HGNC Symbol	1	ribosomal protein S4X pseudogene 9 [Source:HGNC Symbol;Acc:HGNC:35792]	2.16017	4.46967
ENSG00000123329	64333	ARHGAP9	protein_coding	HGNC Symbol	24	Rho GTPase activating protein 9 [Source:HGNC Symbol;Acc:HGNC:14130]	2.16025	4.46994
ENSG00000010438	5646	PRSS3	protein_coding	HGNC Symbol	8	serine protease 3 [Source:HGNC Symbol;Acc:HGNC:9486]	2.16152	4.47385
ENSG00000049759	23327	NEDD4L	protein_coding	HGNC Symbol	38	NEDD4 like E3 ubiquitin protein ligase [Source:HGNC Symbol;Acc:HGNC:7728]	2.16165	4.47428
ENSG00000149564	90952	ESAM	protein_coding	HGNC Symbol	6	endothelial cell adhesion molecule [Source:HGNC Symbol;Acc:HGNC:17474]	2.16631	4.48875
ENSG00000149926	83723	TLCD3B	protein_coding	HGNC Symbol	7	TLC domain containing 3B [Source:HGNC Symbol;Acc:HGNC:25295]	2.16887	4.49671
ENSG00000088340	NA	FER1L4	transcribed_unitary_pseudogene	HGNC Symbol	18	fer-1 like family member 4 (pseudogene) [Source:HGNC Symbol;Acc:HGNC:15801]	2.17055	4.50194
ENSG00000188385	282973	JAKMIP3	protein_coding	HGNC Symbol	25	Janus kinase and microtubule interacting protein 3 [Source:HGNC Symbol;Acc:HGNC:23523]	2.17209	4.50676
ENSG00000176922	119692	OR51S1	protein_coding	HGNC Symbol	1	olfactory receptor family 51 subfamily S member 1 [Source:HGNC Symbol;Acc:HGNC:15204]	2.17319	4.51019
ENSG00000138650	57575	PCDH10	protein_coding	HGNC Symbol	3	protocadherin 10 [Source:HGNC Symbol;Acc:HGNC:13404]	2.17418	4.5133
ENSG00000165757	57608	JCAD	protein_coding	HGNC Symbol	3	junctional cadherin 5 associated [Source:HGNC Symbol;Acc:HGNC:29283]	2.17442	4.51403
ENSG00000175229	89792	GAL3ST3	protein_coding	HGNC Symbol	3	galactose-3-O-sulfotransferase 3 [Source:HGNC Symbol;Acc:HGNC:24144]	2.17655	4.52072
ENSG00000143845	55224	ETNK2	protein_coding	HGNC Symbol	11	ethanolamine kinase 2 [Source:HGNC Symbol;Acc:HGNC:25575]	2.17742	4.52344
ENSG00000073605	55876	GSDMB	protein_coding	HGNC Symbol	15	gasdermin B [Source:HGNC Symbol;Acc:HGNC:23690]	2.17816	4.52576
ENSG00000178146	NA	AL672207.1	processed_pseudogene	Clone-based (Ensembl) gene	1	glycerol kinase (GK) pseudogene	2.18022	4.53223
ENSG00000197385	344787	ZNF860	protein_coding	HGNC Symbol	2	zinc finger protein 860 [Source:HGNC Symbol;Acc:HGNC:34513]	2.18037	4.53271
ENSG00000181143	94025	MUC16	protein_coding	HGNC Symbol	5	mucin 16, cell surface associated [Source:HGNC Symbol;Acc:HGNC:15582]	2.18484	4.54676
ENSG00000131037	54869	EPS8L1	protein_coding	HGNC Symbol	19	EPS8 like 1 [Source:HGNC Symbol;Acc:HGNC:21295]	2.18551	4.54887
ENSG00000005102	4222	MEOX1	protein_coding	HGNC Symbol	3	mesenchyme homeobox 1 [Source:HGNC Symbol;Acc:HGNC:7013]	2.18796	4.55661
ENSG00000157741	254048	UBN2	protein_coding	HGNC Symbol	4	ubinuclein 2 [Source:HGNC Symbol;Acc:HGNC:21931]	2.1884	4.558
ENSG00000165795	57447	NDRG2	protein_coding	HGNC Symbol	78	NDRG family member 2 [Source:HGNC Symbol;Acc:HGNC:14460]	2.19249	4.57094
ENSG00000173531	4485	MST1	protein_coding	HGNC Symbol	21	macrophage stimulating 1 [Source:HGNC Symbol;Acc:HGNC:7380]	2.19607	4.5823
ENSG00000236255	NA	AC009404.1	lncRNA	Clone-based (Ensembl) gene	5	novel transcript	2.19661	4.58402
ENSG00000135709	9764	KIAA0513	protein_coding	HGNC Symbol	7	KIAA0513 [Source:HGNC Symbol;Acc:HGNC:29058]	2.19785	4.58796
ENSG00000273297	NA	AC009275.1	lncRNA	Clone-based (Ensembl) gene	18	novel transcript	2.2005	4.59637
ENSG00000130821	6535	SLC6A8	protein_coding	HGNC Symbol	10	solute carrier family 6 member 8 [Source:HGNC Symbol;Acc:HGNC:11055]	2.20401	4.60758
ENSG00000117594	3290	HSD11B1	protein_coding	HGNC Symbol	4	hydroxysteroid 11-beta dehydrogenase 1 [Source:HGNC Symbol;Acc:HGNC:5208]	2.20629	4.61486
ENSG00000078053	273	AMPH	protein_coding	HGNC Symbol	9	amphiphysin [Source:HGNC Symbol;Acc:HGNC:471]	2.20684	4.61664
ENSG00000158246	115572	TENT5B	protein_coding	HGNC Symbol	1	terminal nucleotidyltransferase 5B [Source:HGNC Symbol;Acc:HGNC:28273]	2.20732	4.61818
ENSG00000235827	NA	TUBB8P9	unprocessed_pseudogene	HGNC Symbol	1	tubulin beta 8 class VIII pseudogene 9 [Source:HGNC Symbol;Acc:HGNC:42347]	2.20803	4.62045
ENSG00000089820	393	ARHGAP4	protein_coding	HGNC Symbol	24	Rho GTPase activating protein 4 [Source:HGNC Symbol;Acc:HGNC:674]	2.21073	4.6291
ENSG00000138152	118663	BTBD16	protein_coding	HGNC Symbol	3	BTB domain containing 16 [Source:HGNC Symbol;Acc:HGNC:26340]	2.2139	4.63929
ENSG00000141854	113230	MISP3	protein_coding	HGNC Symbol	4	MISP family member 3 [Source:HGNC Symbol;Acc:HGNC:26963]	2.21418	4.64017
ENSG00000176399	63951	DMRTA1	protein_coding	HGNC Symbol	1	DMRT like family A1 [Source:HGNC Symbol;Acc:HGNC:13826]	2.21672	4.64835
ENSG00000117245	57576	KIF17	protein_coding	HGNC Symbol	9	kinesin family member 17 [Source:HGNC Symbol;Acc:HGNC:19167]	2.21712	4.64964
ENSG00000226534	NA	AP000552.1	processed_pseudogene	Clone-based (Ensembl) gene	1	pseudogene similar to part of sushi domain containing 2 (SUSD2)	2.2174	4.65055
ENSG00000234597	NA	AC010096.1	lncRNA	Clone-based (Ensembl) gene	2	novel transcript	2.21878	4.65499
ENSG00000271303	140809	SRXN1	protein_coding	HGNC Symbol	1	sulfiredoxin 1 [Source:HGNC Symbol;Acc:HGNC:16132]	2.22062	4.66095
ENSG00000170175	1140	CHRNB1	protein_coding	HGNC Symbol	8	cholinergic receptor nicotinic beta 1 subunit [Source:HGNC Symbol;Acc:HGNC:1961]	2.22084	4.66164
ENSG00000128510	51200	CPA4	protein_coding	HGNC Symbol	11	carboxypeptidase A4 [Source:HGNC Symbol;Acc:HGNC:15740]	2.22133	4.66324
ENSG00000141384	6875	TAF4B	protein_coding	HGNC Symbol	3	TATA-box binding protein associated factor 4b [Source:HGNC Symbol;Acc:HGNC:11538]	2.22504	4.67523
ENSG00000139567	94	ACVRL1	protein_coding	HGNC Symbol	8	activin A receptor like type 1 [Source:HGNC Symbol;Acc:HGNC:175]	2.22661	4.68032
ENSG00000182057	NA	OGFRP1	lncRNA	HGNC Symbol	5	opioid growth factor receptor pseudogene 1 [Source:HGNC Symbol;Acc:HGNC:50511]	2.23069	4.69359
ENSG00000168243	2786	GNG4	protein_coding	HGNC Symbol	5	G protein subunit gamma 4 [Source:HGNC Symbol;Acc:HGNC:4407]	2.23222	4.69856
ENSG00000250303	NA	LINC02762	lncRNA	HGNC Symbol	6	long intergenic non-protein coding RNA 2762 [Source:HGNC Symbol;Acc:HGNC:27443]	2.23239	4.69913
ENSG00000104826	3972	LHB	protein_coding	HGNC Symbol	2	luteinizing hormone subunit beta [Source:HGNC Symbol;Acc:HGNC:6584]	2.2337	4.70337
ENSG00000186684	339761	CYP27C1	protein_coding	HGNC Symbol	3	cytochrome P450 family 27 subfamily C member 1 [Source:HGNC Symbol;Acc:HGNC:33480]	2.23425	4.70517
ENSG00000258168	NA	AC025569.1	lncRNA	Clone-based (Ensembl) gene	10	novel transcript, antisense to PTPRB	2.23707	4.71439
ENSG00000197558	NA	SSPO	transcribed_unitary_pseudogene	HGNC Symbol	10	SCO-spondin [Source:HGNC Symbol;Acc:HGNC:21998]	2.24083	4.72669
ENSG00000174939	253982	ASPHD1	protein_coding	HGNC Symbol	6	aspartate beta-hydroxylase domain containing 1 [Source:HGNC Symbol;Acc:HGNC:27380]	2.24484	4.73985
ENSG00000260325	94086	HSPB9	protein_coding	HGNC Symbol	1	heat shock protein family B (small) member 9 [Source:HGNC Symbol;Acc:HGNC:30589]	2.24498	4.74029
ENSG00000102837	10562	OLFM4	protein_coding	HGNC Symbol	1	olfactomedin 4 [Source:HGNC Symbol;Acc:HGNC:17190]	2.24946	4.75504
ENSG00000264853	NA	AC011933.2	lncRNA	Clone-based (Ensembl) gene	1	novel transcript, sense intronic to GRB2	2.24966	4.75572
ENSG00000185245	2811	GP1BA	protein_coding	HGNC Symbol	2	glycoprotein Ib platelet subunit alpha [Source:HGNC Symbol;Acc:HGNC:4439]	2.25009	4.75712
ENSG00000089486	29965	CDIP1	protein_coding	HGNC Symbol	14	cell death inducing p53 target 1 [Source:HGNC Symbol;Acc:HGNC:13234]	2.2508	4.75947
ENSG00000231516	NA	CBX1P5	processed_pseudogene	HGNC Symbol	1	chromobox 1 pseudogene 5 [Source:HGNC Symbol;Acc:HGNC:21006]	2.25219	4.76406
ENSG00000138100	57159	TRIM54	protein_coding	HGNC Symbol	4	tripartite motif containing 54 [Source:HGNC Symbol;Acc:HGNC:16008]	2.25839	4.78457
ENSG00000184497	348013	TMEM255B	protein_coding	HGNC Symbol	6	transmembrane protein 255B [Source:HGNC Symbol;Acc:HGNC:28297]	2.25895	4.78643
ENSG00000205976	NA	AC091951.1	unprocessed_pseudogene	Clone-based (Ensembl) gene	1	golgi autoantigen, golgin subfamily a, 6-like 2 (GOLGA6L2) pseudogene	2.26232	4.79761
ENSG00000111907	7164	TPD52L1	protein_coding	HGNC Symbol	17	TPD52 like 1 [Source:HGNC Symbol;Acc:HGNC:12006]	2.26306	4.80007
ENSG00000198934	57692	MAGEE1	protein_coding	HGNC Symbol	1	MAGE family member E1 [Source:HGNC Symbol;Acc:HGNC:24934]	2.26356	4.80175
ENSG00000164070	22824	HSPA4L	protein_coding	HGNC Symbol	5	heat shock protein family A (Hsp70) member 4 like [Source:HGNC Symbol;Acc:HGNC:17041]	2.26834	4.81768
ENSG00000225953	NA	SATB2-AS1	lncRNA	HGNC Symbol	7	SATB2 antisense RNA 1 [Source:HGNC Symbol;Acc:HGNC:26490]	2.27289	4.83289
ENSG00000164647	26872	STEAP1	protein_coding	HGNC Symbol	3	STEAP family member 1 [Source:HGNC Symbol;Acc:HGNC:11378]	2.27519	4.84061
ENSG00000245498	NA	AP000866.1	lncRNA	Clone-based (Ensembl) gene	16	novel transcript, antisense to C11orf61	2.27545	4.8415
ENSG00000149054	7762	ZNF215	protein_coding	HGNC Symbol	9	zinc finger protein 215 [Source:HGNC Symbol;Acc:HGNC:13007]	2.27605	4.8435
ENSG00000101680	284217	LAMA1	protein_coding	HGNC Symbol	9	laminin subunit alpha 1 [Source:HGNC Symbol;Acc:HGNC:6481]	2.2777	4.84905
ENSG00000163624	1040	CDS1	protein_coding	HGNC Symbol	2	CDP-diacylglycerol synthase 1 [Source:HGNC Symbol;Acc:HGNC:1800]	2.2787	4.85239
ENSG00000122877	1959	EGR2	protein_coding	HGNC Symbol	6	early growth response 2 [Source:HGNC Symbol;Acc:HGNC:3239]	2.27882	4.85282
ENSG00000166816	197257	LDHD	protein_coding	HGNC Symbol	4	lactate dehydrogenase D [Source:HGNC Symbol;Acc:HGNC:19708]	2.27952	4.85517
ENSG00000102554	688	KLF5	protein_coding	HGNC Symbol	5	Kruppel like factor 5 [Source:HGNC Symbol;Acc:HGNC:6349]	2.27956	4.85529
ENSG00000152078	148534	TLCD4	protein_coding	HGNC Symbol	4	TLC domain containing 4 [Source:HGNC Symbol;Acc:HGNC:26477]	2.28195	4.86335
ENSG00000235524	NA	MTCO1P23	processed_pseudogene	HGNC Symbol	1	MT-CO1 pseudogene 23 [Source:HGNC Symbol;Acc:HGNC:52088]	2.28198	4.86343
ENSG00000089723	78990	OTUB2	protein_coding	HGNC Symbol	2	OTU deubiquitinase, ubiquitin aldehyde binding 2 [Source:HGNC Symbol;Acc:HGNC:20351]	2.28243	4.86496
ENSG00000144668	3680	ITGA9	protein_coding	HGNC Symbol	4	integrin subunit alpha 9 [Source:HGNC Symbol;Acc:HGNC:6145]	2.28478	4.87291
ENSG00000117983	727897	MUC5B	protein_coding	HGNC Symbol	5	mucin 5B, oligomeric mucus/gel-forming [Source:HGNC Symbol;Acc:HGNC:7516]	2.28498	4.87357
ENSG00000236626	NA	MTND5P17	processed_pseudogene	HGNC Symbol	1	MT-ND5 pseudogene 17 [Source:HGNC Symbol;Acc:HGNC:42279]	2.28697	4.8803
ENSG00000151623	4306	NR3C2	protein_coding	HGNC Symbol	9	nuclear receptor subfamily 3 group C member 2 [Source:HGNC Symbol;Acc:HGNC:7979]	2.29677	4.91355
ENSG00000171428	9	NAT1	protein_coding	HGNC Symbol	10	N-acetyltransferase 1 [Source:HGNC Symbol;Acc:HGNC:7645]	2.29788	4.91733
ENSG00000105523	54854	FAM83E	protein_coding	HGNC Symbol	4	family with sequence similarity 83 member E [Source:HGNC Symbol;Acc:HGNC:25972]	2.29912	4.92157
ENSG00000149927	8448	DOC2A	protein_coding	HGNC Symbol	18	double C2 domain alpha [Source:HGNC Symbol;Acc:HGNC:2985]	2.30059	4.9266
ENSG00000042980	10863	ADAM28	protein_coding	HGNC Symbol	12	ADAM metallopeptidase domain 28 [Source:HGNC Symbol;Acc:HGNC:206]	2.30256	4.93331
ENSG00000164299	84654	SPZ1	protein_coding	HGNC Symbol	2	spermatogenic leucine zipper 1 [Source:HGNC Symbol;Acc:HGNC:30721]	2.30485	4.94118
ENSG00000242307	NA	RPS26P52	processed_pseudogene	HGNC Symbol	1	ribosomal protein S26 pseudogene 52 [Source:HGNC Symbol;Acc:HGNC:36863]	2.30579	4.94437
ENSG00000268355	NA	AC243960.3	lncRNA	Clone-based (Ensembl) gene	2	novel transcript	2.30729	4.94952
ENSG00000231989	153743	PPP1R2B	protein_coding	HGNC Symbol	1	PPP1R2 family member B [Source:HGNC Symbol;Acc:HGNC:16318]	2.30812	4.95238
ENSG00000267325	NA	LINC01415	lncRNA	HGNC Symbol	7	long intergenic non-protein coding RNA 1415 [Source:HGNC Symbol;Acc:HGNC:50709]	2.3097	4.95778
ENSG00000169891	9185	REPS2	protein_coding	HGNC Symbol	5	RALBP1 associated Eps domain containing 2 [Source:HGNC Symbol;Acc:HGNC:9963]	2.31028	4.9598
ENSG00000101017	958	CD40	protein_coding	HGNC Symbol	7	CD40 molecule [Source:HGNC Symbol;Acc:HGNC:11919]	2.3107	4.96123
ENSG00000121653	9479	MAPK8IP1	protein_coding	HGNC Symbol	3	mitogen-activated protein kinase 8 interacting protein 1 [Source:HGNC Symbol;Acc:HGNC:6882]	2.31233	4.96685
ENSG00000124171	84612	PARD6B	protein_coding	HGNC Symbol	2	par-6 family cell polarity regulator beta [Source:HGNC Symbol;Acc:HGNC:16245]	2.31254	4.96756
ENSG00000165730	219736	STOX1	protein_coding	HGNC Symbol	5	storkhead box 1 [Source:HGNC Symbol;Acc:HGNC:23508]	2.31314	4.96964
ENSG00000144647	84892	POMGNT2	protein_coding	HGNC Symbol	2	protein O-linked mannose N-acetylglucosaminyltransferase 2 (beta 1,4-) [Source:HGNC Symbol;Acc:HGNC:25902]	2.31434	4.97376
ENSG00000230987	NA	AL359976.1	processed_pseudogene	Clone-based (Ensembl) gene	1	DEAH (Asp-Glu-Ala-His) box polypeptide 29 (DHX29) pseudogene	2.31459	4.97464
ENSG00000166455	123775	C16orf46	protein_coding	HGNC Symbol	4	chromosome 16 open reading frame 46 [Source:HGNC Symbol;Acc:HGNC:26525]	2.31882	4.98923
ENSG00000247626	92935	MARS2	protein_coding	HGNC Symbol	1	methionyl-tRNA synthetase 2, mitochondrial [Source:HGNC Symbol;Acc:HGNC:25133]	2.32001	4.99337
ENSG00000198700	55705	IPO9	protein_coding	HGNC Symbol	4	importin 9 [Source:HGNC Symbol;Acc:HGNC:19425]	2.32231	5.00132
ENSG00000163864	349565	NMNAT3	protein_coding	HGNC Symbol	21	nicotinamide nucleotide adenylyltransferase 3 [Source:HGNC Symbol;Acc:HGNC:20989]	2.32241	5.00168
ENSG00000252311	NA	RNU1-103P	snRNA	HGNC Symbol	1	RNA, U1 small nuclear 103, pseudogene [Source:HGNC Symbol;Acc:HGNC:48445]	2.32323	5.00452
ENSG00000130584	140685	ZBTB46	protein_coding	HGNC Symbol	6	zinc finger and BTB domain containing 46 [Source:HGNC Symbol;Acc:HGNC:16094]	2.32431	5.00826
ENSG00000152402	2977	GUCY1A2	protein_coding	HGNC Symbol	3	guanylate cyclase 1 soluble subunit alpha 2 [Source:HGNC Symbol;Acc:HGNC:4684]	2.32501	5.01071
ENSG00000133069	9911	TMCC2	protein_coding	HGNC Symbol	10	transmembrane and coiled-coil domain family 2 [Source:HGNC Symbol;Acc:HGNC:24239]	2.3286	5.02316
ENSG00000171017	80131	LRRC8E	protein_coding	HGNC Symbol	6	leucine rich repeat containing 8 VRAC subunit E [Source:HGNC Symbol;Acc:HGNC:26272]	2.32897	5.02446
ENSG00000144893	116931	MED12L	protein_coding	HGNC Symbol	9	mediator complex subunit 12L [Source:HGNC Symbol;Acc:HGNC:16050]	2.33184	5.03448
ENSG00000169258	114787	GPRIN1	protein_coding	HGNC Symbol	1	G protein regulated inducer of neurite outgrowth 1 [Source:HGNC Symbol;Acc:HGNC:24835]	2.33191	5.03471
ENSG00000187122	6585	SLIT1	protein_coding	HGNC Symbol	7	slit guidance ligand 1 [Source:HGNC Symbol;Acc:HGNC:11085]	2.33337	5.03982
ENSG00000184599	284467	TAFA3	protein_coding	HGNC Symbol	2	TAFA chemokine like family member 3 [Source:HGNC Symbol;Acc:HGNC:21590]	2.33364	5.04074
ENSG00000117305	3155	HMGCL	protein_coding	HGNC Symbol	9	3-hydroxy-3-methylglutaryl-CoA lyase [Source:HGNC Symbol;Acc:HGNC:5005]	2.33526	5.04642
ENSG00000105991	3198	HOXA1	protein_coding	HGNC Symbol	2	homeobox A1 [Source:HGNC Symbol;Acc:HGNC:5099]	2.33609	5.04931
ENSG00000137642	6653	SORL1	protein_coding	HGNC Symbol	13	sortilin related receptor 1 [Source:HGNC Symbol;Acc:HGNC:11185]	2.33981	5.06237
ENSG00000114378	3373	HYAL1	protein_coding	HGNC Symbol	9	hyaluronidase 1 [Source:HGNC Symbol;Acc:HGNC:5320]	2.34569	5.08302
ENSG00000054690	57475	PLEKHH1	protein_coding	HGNC Symbol	16	pleckstrin homology, MyTH4 and FERM domain containing H1 [Source:HGNC Symbol;Acc:HGNC:17733]	2.35087	5.10132
ENSG00000177238	493829	TRIM72	protein_coding	HGNC Symbol	2	tripartite motif containing 72 [Source:HGNC Symbol;Acc:HGNC:32671]	2.35092	5.10151
ENSG00000110042	23220	DTX4	protein_coding	HGNC Symbol	4	deltex E3 ubiquitin ligase 4 [Source:HGNC Symbol;Acc:HGNC:29151]	2.35236	5.10659
ENSG00000227586	NA	RPS26P39	processed_pseudogene	HGNC Symbol	1	ribosomal protein S26 pseudogene 39 [Source:HGNC Symbol;Acc:HGNC:36958]	2.35285	5.10833
ENSG00000187796	64170	CARD9	protein_coding	HGNC Symbol	8	caspase recruitment domain family member 9 [Source:HGNC Symbol;Acc:HGNC:16391]	2.35343	5.11038
ENSG00000204388	3304	HSPA1B	protein_coding	HGNC Symbol	1	heat shock protein family A (Hsp70) member 1B [Source:HGNC Symbol;Acc:HGNC:5233]	2.35687	5.12258
ENSG00000105290	333	APLP1	protein_coding	HGNC Symbol	12	amyloid beta precursor like protein 1 [Source:HGNC Symbol;Acc:HGNC:597]	2.3631	5.14473
ENSG00000158158	26504	CNNM4	protein_coding	HGNC Symbol	4	cyclin and CBS domain divalent metal cation transport mediator 4 [Source:HGNC Symbol;Acc:HGNC:105]	2.36456	5.14997
ENSG00000169085	254778	VXN	protein_coding	HGNC Symbol	10	vexin [Source:HGNC Symbol;Acc:HGNC:28498]	2.36604	5.15522
ENSG00000185669	333929	SNAI3	protein_coding	HGNC Symbol	1	snail family transcriptional repressor 3 [Source:HGNC Symbol;Acc:HGNC:18411]	2.36692	5.1584
ENSG00000273233	NA	AC097724.1	lncRNA	Clone-based (Ensembl) gene	1	novel transcript	2.36853	5.16416
ENSG00000254473	NA	AL354920.1	lncRNA	Clone-based (Ensembl) gene	2	novel transcript, antisense to UBQLN1	2.37055	5.17137
ENSG00000205955	NA	HSP90AA5P	transcribed_processed_pseudogene	HGNC Symbol	1	heat shock protein 90 alpha family class A member 5, pseudogene [Source:HGNC Symbol;Acc:HGNC:32535]	2.37306	5.1804
ENSG00000120217	29126	CD274	protein_coding	HGNC Symbol	5	CD274 molecule [Source:HGNC Symbol;Acc:HGNC:17635]	2.37378	5.18298
ENSG00000168824	27065	NSG1	protein_coding	HGNC Symbol	11	neuronal vesicle trafficking associated 1 [Source:HGNC Symbol;Acc:HGNC:18790]	2.37567	5.18977
ENSG00000124374	400961	PAIP2B	protein_coding	HGNC Symbol	1	poly(A) binding protein interacting protein 2B [Source:HGNC Symbol;Acc:HGNC:29200]	2.37674	5.19362
ENSG00000079393	51207	DUSP13	protein_coding	HGNC Symbol	15	dual specificity phosphatase 13 [Source:HGNC Symbol;Acc:HGNC:19681]	2.37731	5.19568
ENSG00000172137	794	CALB2	protein_coding	HGNC Symbol	5	calbindin 2 [Source:HGNC Symbol;Acc:HGNC:1435]	2.37876	5.20089
ENSG00000130529	54795	TRPM4	protein_coding	HGNC Symbol	14	transient receptor potential cation channel subfamily M member 4 [Source:HGNC Symbol;Acc:HGNC:17993]	2.3802	5.2061
ENSG00000227706	NA	AL713998.1	lncRNA	Clone-based (Ensembl) gene	14	novel transcript	2.38335	5.21746
ENSG00000105479	93233	CCDC114	protein_coding	HGNC Symbol	9	coiled-coil domain containing 114 [Source:HGNC Symbol;Acc:HGNC:26560]	2.38682	5.23004
ENSG00000196502	6817	SULT1A1	protein_coding	HGNC Symbol	11	sulfotransferase family 1A member 1 [Source:HGNC Symbol;Acc:HGNC:11453]	2.38718	5.23135
ENSG00000273604	100170841	EPOP	protein_coding	HGNC Symbol	1	elongin BC and polycomb repressive complex 2 associated protein [Source:HGNC Symbol;Acc:HGNC:34493]	2.3901	5.24193
ENSG00000110723	23086	EXPH5	protein_coding	HGNC Symbol	6	exophilin 5 [Source:HGNC Symbol;Acc:HGNC:30578]	2.39221	5.2496
ENSG00000185518	9899	SV2B	protein_coding	HGNC Symbol	6	synaptic vesicle glycoprotein 2B [Source:HGNC Symbol;Acc:HGNC:16874]	2.39788	5.27026
ENSG00000156345	23552	CDK20	protein_coding	HGNC Symbol	10	cyclin dependent kinase 20 [Source:HGNC Symbol;Acc:HGNC:21420]	2.39896	5.27421
ENSG00000115593	150572	SMYD1	protein_coding	HGNC Symbol	4	SET and MYND domain containing 1 [Source:HGNC Symbol;Acc:HGNC:20986]	2.39932	5.27553
ENSG00000233559	NA	LINC00513	lncRNA	HGNC Symbol	4	long intergenic non-protein coding RNA 513 [Source:HGNC Symbol;Acc:HGNC:43566]	2.40057	5.28012
ENSG00000276980	NA	AC008760.2	lncRNA	Clone-based (Ensembl) gene	1	novel transcript, sense intronic C3	2.40107	5.28196
ENSG00000160223	23308	ICOSLG	protein_coding	HGNC Symbol	5	inducible T cell costimulator ligand [Source:HGNC Symbol;Acc:HGNC:17087]	2.40308	5.2893
ENSG00000277241	NA	AC026355.4	processed_pseudogene	Clone-based (Ensembl) gene	1	fibroblast growth factor receptor 3 (FGFR3) pseudogene	2.40332	5.29019
ENSG00000049089	1298	COL9A2	protein_coding	HGNC Symbol	12	collagen type IX alpha 2 chain [Source:HGNC Symbol;Acc:HGNC:2218]	2.40413	5.29317
ENSG00000232333	NA	RPS27AP2	processed_pseudogene	HGNC Symbol	1	ribosomal protein S27a pseudogene 2 [Source:HGNC Symbol;Acc:HGNC:16572]	2.40795	5.3072
ENSG00000182916	56849	TCEAL7	protein_coding	HGNC Symbol	2	transcription elongation factor A like 7 [Source:HGNC Symbol;Acc:HGNC:28336]	2.40856	5.30944
ENSG00000105784	154661	RUNDC3B	protein_coding	HGNC Symbol	9	RUN domain containing 3B [Source:HGNC Symbol;Acc:HGNC:30286]	2.41044	5.31637
ENSG00000226287	NA	TMEM191A	transcribed_unprocessed_pseudogene	HGNC Symbol	11	transmembrane protein 191A (pseudogene) [Source:HGNC Symbol;Acc:HGNC:25317]	2.41543	5.33478
ENSG00000185519	348487	FAM131C	protein_coding	HGNC Symbol	2	family with sequence similarity 131 member C [Source:HGNC Symbol;Acc:HGNC:26717]	2.41559	5.33536
ENSG00000205835	647309	GMNC	protein_coding	HGNC Symbol	4	geminin coiled-coil domain containing [Source:HGNC Symbol;Acc:HGNC:40049]	2.41634	5.33815
ENSG00000158555	81544	GDPD5	protein_coding	HGNC Symbol	17	glycerophosphodiester phosphodiesterase domain containing 5 [Source:HGNC Symbol;Acc:HGNC:28804]	2.41733	5.34181
ENSG00000132031	4148	MATN3	protein_coding	HGNC Symbol	3	matrilin 3 [Source:HGNC Symbol;Acc:HGNC:6909]	2.42016	5.3523
ENSG00000171126	170850	KCNG3	protein_coding	HGNC Symbol	2	potassium voltage-gated channel modifier subfamily G member 3 [Source:HGNC Symbol;Acc:HGNC:18306]	2.42364	5.36522
ENSG00000105383	945	CD33	protein_coding	HGNC Symbol	7	CD33 molecule [Source:HGNC Symbol;Acc:HGNC:1659]	2.42581	5.37331
ENSG00000180336	284071	MEIOC	protein_coding	HGNC Symbol	7	meiosis specific with coiled-coil domain [Source:HGNC Symbol;Acc:HGNC:26670]	2.42734	5.379
ENSG00000171346	3866	KRT15	protein_coding	HGNC Symbol	9	keratin 15 [Source:HGNC Symbol;Acc:HGNC:6421]	2.42887	5.38471
ENSG00000081181	384	ARG2	protein_coding	HGNC Symbol	4	arginase 2 [Source:HGNC Symbol;Acc:HGNC:664]	2.42954	5.38722
ENSG00000164309	202333	CMYA5	protein_coding	HGNC Symbol	3	cardiomyopathy associated 5 [Source:HGNC Symbol;Acc:HGNC:14305]	2.43015	5.3895
ENSG00000187098	4286	MITF	protein_coding	HGNC Symbol	18	melanocyte inducing transcription factor [Source:HGNC Symbol;Acc:HGNC:7105]	2.43185	5.39584
ENSG00000185640	338785	KRT79	protein_coding	HGNC Symbol	3	keratin 79 [Source:HGNC Symbol;Acc:HGNC:28930]	2.43228	5.39746
ENSG00000143320	1382	CRABP2	protein_coding	HGNC Symbol	4	cellular retinoic acid binding protein 2 [Source:HGNC Symbol;Acc:HGNC:2339]	2.43381	5.40317
ENSG00000270257	NA	AC096720.1	processed_pseudogene	Clone-based (Ensembl) gene	1	small EDRK-rich factor 2 (SERF2) pseudogene	2.43501	5.40768
ENSG00000180616	6752	SSTR2	protein_coding	HGNC Symbol	2	somatostatin receptor 2 [Source:HGNC Symbol;Acc:HGNC:11331]	2.43714	5.41567
ENSG00000073910	10129	FRY	protein_coding	HGNC Symbol	15	FRY microtubule binding protein [Source:HGNC Symbol;Acc:HGNC:20367]	2.43766	5.41762
ENSG00000083454	5026	P2RX5	protein_coding	HGNC Symbol	11	purinergic receptor P2X 5 [Source:HGNC Symbol;Acc:HGNC:8536]	2.43819	5.41963
ENSG00000179361	10620	ARID3B	protein_coding	HGNC Symbol	6	AT-rich interaction domain 3B [Source:HGNC Symbol;Acc:HGNC:14350]	2.43993	5.42614
ENSG00000243104	NA	MTND4LP14	processed_pseudogene	HGNC Symbol	1	MT-ND4L pseudogene 14 [Source:HGNC Symbol;Acc:HGNC:42248]	2.44312	5.43816
ENSG00000144229	80731	THSD7B	protein_coding	HGNC Symbol	6	thrombospondin type 1 domain containing 7B [Source:HGNC Symbol;Acc:HGNC:29348]	2.44575	5.44809
ENSG00000095637	10580	SORBS1	protein_coding	HGNC Symbol	23	sorbin and SH3 domain containing 1 [Source:HGNC Symbol;Acc:HGNC:14565]	2.44722	5.45362
ENSG00000107736	64072	CDH23	protein_coding	HGNC Symbol	19	cadherin related 23 [Source:HGNC Symbol;Acc:HGNC:13733]	2.44813	5.45708
ENSG00000171291	90594	ZNF439	protein_coding	HGNC Symbol	5	zinc finger protein 439 [Source:HGNC Symbol;Acc:HGNC:20873]	2.45379	5.47853
ENSG00000164512	79722	ANKRD55	protein_coding	HGNC Symbol	6	ankyrin repeat domain 55 [Source:HGNC Symbol;Acc:HGNC:25681]	2.45518	5.48383
ENSG00000231924	5669	PSG1	protein_coding	HGNC Symbol	11	pregnancy specific beta-1-glycoprotein 1 [Source:HGNC Symbol;Acc:HGNC:9514]	2.46189	5.5094
ENSG00000163590	151742	PPM1L	protein_coding	HGNC Symbol	5	protein phosphatase, Mg2+/Mn2+ dependent 1L [Source:HGNC Symbol;Acc:HGNC:16381]	2.46364	5.51605
ENSG00000271824	389332	SMIM32	protein_coding	HGNC Symbol	1	small integral membrane protein 32 [Source:HGNC Symbol;Acc:HGNC:53640]	2.46561	5.5236
ENSG00000141314	162494	RHBDL3	protein_coding	HGNC Symbol	6	rhomboid like 3 [Source:HGNC Symbol;Acc:HGNC:16502]	2.46607	5.52538
ENSG00000239556	NA	AC004951.2	transcribed_unprocessed_pseudogene	Clone-based (Ensembl) gene	1	uroplakin-like protein (UPLP) pseudogene	2.46673	5.52787
ENSG00000051523	1535	CYBA	protein_coding	HGNC Symbol	10	cytochrome b-245 alpha chain [Source:HGNC Symbol;Acc:HGNC:2577]	2.46825	5.53371
ENSG00000214900	NA	LINC01588	lncRNA	HGNC Symbol	19	long intergenic non-protein coding RNA 1588 [Source:HGNC Symbol;Acc:HGNC:27503]	2.4701	5.54081
ENSG00000089163	23409	SIRT4	protein_coding	HGNC Symbol	3	sirtuin 4 [Source:HGNC Symbol;Acc:HGNC:14932]	2.47252	5.55012
ENSG00000066248	25791	NGEF	protein_coding	HGNC Symbol	9	neuronal guanine nucleotide exchange factor [Source:HGNC Symbol;Acc:HGNC:7807]	2.47643	5.56519
ENSG00000180543	85453	TSPYL5	protein_coding	HGNC Symbol	1	TSPY like 5 [Source:HGNC Symbol;Acc:HGNC:29367]	2.4771	5.56779
ENSG00000173338	10089	KCNK7	protein_coding	HGNC Symbol	6	potassium two pore domain channel subfamily K member 7 [Source:HGNC Symbol;Acc:HGNC:6282]	2.48015	5.57955
ENSG00000142910	64129	TINAGL1	protein_coding	HGNC Symbol	11	tubulointerstitial nephritis antigen like 1 [Source:HGNC Symbol;Acc:HGNC:19168]	2.48071	5.58171
ENSG00000141655	8792	TNFRSF11A	protein_coding	HGNC Symbol	7	TNF receptor superfamily member 11a [Source:HGNC Symbol;Acc:HGNC:11908]	2.48083	5.5822
ENSG00000168702	53353	LRP1B	protein_coding	HGNC Symbol	5	LDL receptor related protein 1B [Source:HGNC Symbol;Acc:HGNC:6693]	2.48108	5.58317
ENSG00000171517	23566	LPAR3	protein_coding	HGNC Symbol	3	lysophosphatidic acid receptor 3 [Source:HGNC Symbol;Acc:HGNC:14298]	2.48152	5.58485
ENSG00000183762	83999	KREMEN1	protein_coding	HGNC Symbol	6	kringle containing transmembrane protein 1 [Source:HGNC Symbol;Acc:HGNC:17550]	2.48555	5.60047
ENSG00000163638	56999	ADAMTS9	protein_coding	HGNC Symbol	10	ADAM metallopeptidase with thrombospondin type 1 motif 9 [Source:HGNC Symbol;Acc:HGNC:13202]	2.48588	5.60178
ENSG00000143674	84451	MAP3K21	protein_coding	HGNC Symbol	3	mitogen-activated protein kinase kinase kinase 21 [Source:HGNC Symbol;Acc:HGNC:29798]	2.48602	5.60231
ENSG00000102409	56271	BEX4	protein_coding	HGNC Symbol	2	brain expressed X-linked 4 [Source:HGNC Symbol;Acc:HGNC:25475]	2.48702	5.60618
ENSG00000229032	NA	AL445685.2	processed_pseudogene	Clone-based (Ensembl) gene	1	40s ribosomal protein S26 (RPS26) pseudogene	2.48837	5.61144
ENSG00000078018	4133	MAP2	protein_coding	HGNC Symbol	17	microtubule associated protein 2 [Source:HGNC Symbol;Acc:HGNC:6839]	2.4892	5.61466
ENSG00000259775	NA	AL138976.2	lncRNA	Clone-based (Ensembl) gene	1	novel transcript, antisense to EIF5	2.48923	5.61477
ENSG00000162426	50651	SLC45A1	protein_coding	HGNC Symbol	4	solute carrier family 45 member 1 [Source:HGNC Symbol;Acc:HGNC:17939]	2.49789	5.6486
ENSG00000154553	27295	PDLIM3	protein_coding	HGNC Symbol	14	PDZ and LIM domain 3 [Source:HGNC Symbol;Acc:HGNC:20767]	2.49935	5.65432
ENSG00000258311	NA	AC009779.4	protein_coding	Clone-based (Ensembl) gene	4	novel protein	2.50006	5.6571
ENSG00000131480	314	AOC2	protein_coding	HGNC Symbol	2	amine oxidase copper containing 2 [Source:HGNC Symbol;Acc:HGNC:549]	2.50122	5.66164
ENSG00000188730	375567	VWC2	protein_coding	HGNC Symbol	1	von Willebrand factor C domain containing 2 [Source:HGNC Symbol;Acc:HGNC:30200]	2.50195	5.6645
ENSG00000156711	5603	MAPK13	protein_coding	HGNC Symbol	5	mitogen-activated protein kinase 13 [Source:HGNC Symbol;Acc:HGNC:6875]	2.5102	5.697
ENSG00000156299	7074	TIAM1	protein_coding	HGNC Symbol	7	TIAM Rac1 associated GEF 1 [Source:HGNC Symbol;Acc:HGNC:11805]	2.51041	5.69783
ENSG00000278384	NA	AL354822.1	protein_coding	Clone-based (Ensembl) gene	1		2.51161	5.70258
ENSG00000159733	57732	ZFYVE28	protein_coding	HGNC Symbol	11	zinc finger FYVE-type containing 28 [Source:HGNC Symbol;Acc:HGNC:29334]	2.51375	5.71104
ENSG00000166510	80323	CCDC68	protein_coding	HGNC Symbol	6	coiled-coil domain containing 68 [Source:HGNC Symbol;Acc:HGNC:24350]	2.51542	5.71763
ENSG00000197872	81553	CYRIA	protein_coding	HGNC Symbol	5	CYFIP related Rac1 interactor A [Source:HGNC Symbol;Acc:HGNC:25373]	2.51582	5.71923
ENSG00000261341	NA	AC010325.1	protein_coding	Clone-based (Ensembl) gene	3	novel protein	2.51872	5.73072
ENSG00000104043	79895	ATP8B4	protein_coding	HGNC Symbol	19	ATPase phospholipid transporting 8B4 (putative) [Source:HGNC Symbol;Acc:HGNC:13536]	2.5214	5.74138
ENSG00000160469	84446	BRSK1	protein_coding	HGNC Symbol	8	BR serine/threonine kinase 1 [Source:HGNC Symbol;Acc:HGNC:18994]	2.52369	5.75051
ENSG00000152056	130340	AP1S3	protein_coding	HGNC Symbol	8	adaptor related protein complex 1 subunit sigma 3 [Source:HGNC Symbol;Acc:HGNC:18971]	2.52663	5.76225
ENSG00000205105	NA	COX17P1	processed_pseudogene	HGNC Symbol	1	COX17 pseudogene 1 [Source:HGNC Symbol;Acc:HGNC:24341]	2.52887	5.77121
ENSG00000120756	5357	PLS1	protein_coding	HGNC Symbol	12	plastin 1 [Source:HGNC Symbol;Acc:HGNC:9090]	2.53496	5.79561
ENSG00000227563	NA	RNF11P2	processed_pseudogene	HGNC Symbol	1	ring finger protein 11 pseudogene 2 [Source:HGNC Symbol;Acc:HGNC:16535]	2.53825	5.80884
ENSG00000008056	6853	SYN1	protein_coding	HGNC Symbol	5	synapsin I [Source:HGNC Symbol;Acc:HGNC:11494]	2.54107	5.82022
ENSG00000242147	NA	LINC02657	lncRNA	HGNC Symbol	3	long intergenic non-protein coding RNA 2657 [Source:HGNC Symbol;Acc:HGNC:54143]	2.5429	5.82759
ENSG00000186648	90668	CARMIL3	protein_coding	HGNC Symbol	4	capping protein regulator and myosin 1 linker 3 [Source:HGNC Symbol;Acc:HGNC:20272]	2.54361	5.83046
ENSG00000155066	150696	PROM2	protein_coding	HGNC Symbol	11	prominin 2 [Source:HGNC Symbol;Acc:HGNC:20685]	2.5441	5.83245
ENSG00000174059	947	CD34	protein_coding	HGNC Symbol	4	CD34 molecule [Source:HGNC Symbol;Acc:HGNC:1662]	2.54528	5.83721
ENSG00000261150	83481	EPPK1	protein_coding	HGNC Symbol	2	epiplakin 1 [Source:HGNC Symbol;Acc:HGNC:15577]	2.54621	5.84098
ENSG00000173825	220359	TIGD3	protein_coding	HGNC Symbol	1	tigger transposable element derived 3 [Source:HGNC Symbol;Acc:HGNC:18334]	2.54625	5.84114
ENSG00000163347	9076	CLDN1	protein_coding	HGNC Symbol	2	claudin 1 [Source:HGNC Symbol;Acc:HGNC:2032]	2.54684	5.84352
ENSG00000184524	51286	CEND1	protein_coding	HGNC Symbol	2	cell cycle exit and neuronal differentiation 1 [Source:HGNC Symbol;Acc:HGNC:24153]	2.54723	5.8451
ENSG00000076641	55824	PAG1	protein_coding	HGNC Symbol	4	phosphoprotein membrane anchor with glycosphingolipid microdomains 1 [Source:HGNC Symbol;Acc:HGNC:30043]	2.54939	5.85388
ENSG00000198807	5083	PAX9	protein_coding	HGNC Symbol	6	paired box 9 [Source:HGNC Symbol;Acc:HGNC:8623]	2.55238	5.86601
ENSG00000104808	27294	DHDH	protein_coding	HGNC Symbol	4	dihydrodiol dehydrogenase [Source:HGNC Symbol;Acc:HGNC:17887]	2.55278	5.86764
ENSG00000161243	126433	FBXO27	protein_coding	HGNC Symbol	7	F-box protein 27 [Source:HGNC Symbol;Acc:HGNC:18753]	2.55399	5.87258
ENSG00000268655	NA	AC008687.4	protein_coding	Clone-based (Ensembl) gene	2	novel protein	2.55658	5.88313
ENSG00000123364	3229	HOXC13	protein_coding	HGNC Symbol	1	homeobox C13 [Source:HGNC Symbol;Acc:HGNC:5125]	2.56181	5.90448
ENSG00000155918	154064	RAET1L	protein_coding	HGNC Symbol	2	retinoic acid early transcript 1L [Source:HGNC Symbol;Acc:HGNC:16798]	2.56611	5.92209
ENSG00000166415	256764	WDR72	protein_coding	HGNC Symbol	8	WD repeat domain 72 [Source:HGNC Symbol;Acc:HGNC:26790]	2.57378	5.95365
ENSG00000255624	NA	C10orf88B	transcribed_processed_pseudogene	HGNC Symbol	2	C10orf88B, pseudogene [Source:HGNC Symbol;Acc:HGNC:44080]	2.57435	5.95604
ENSG00000164746	136288	C7orf57	protein_coding	HGNC Symbol	6	chromosome 7 open reading frame 57 [Source:HGNC Symbol;Acc:HGNC:22247]	2.57546	5.96063
ENSG00000187527	344905	ATP13A5	protein_coding	HGNC Symbol	5	ATPase 13A5 [Source:HGNC Symbol;Acc:HGNC:31789]	2.57695	5.96678
ENSG00000154451	115362	GBP5	protein_coding	HGNC Symbol	5	guanylate binding protein 5 [Source:HGNC Symbol;Acc:HGNC:19895]	2.57771	5.96991
ENSG00000116852	23046	KIF21B	protein_coding	HGNC Symbol	5	kinesin family member 21B [Source:HGNC Symbol;Acc:HGNC:29442]	2.579	5.97526
ENSG00000261787	100129654	TCF24	protein_coding	HGNC Symbol	2	transcription factor 24 [Source:HGNC Symbol;Acc:HGNC:32275]	2.58086	5.98298
ENSG00000066294	8832	CD84	protein_coding	HGNC Symbol	8	CD84 molecule [Source:HGNC Symbol;Acc:HGNC:1704]	2.58106	5.98381
ENSG00000132692	63827	BCAN	protein_coding	HGNC Symbol	8	brevican [Source:HGNC Symbol;Acc:HGNC:23059]	2.58217	5.9884
ENSG00000131771	84152	PPP1R1B	protein_coding	HGNC Symbol	10	protein phosphatase 1 regulatory inhibitor subunit 1B [Source:HGNC Symbol;Acc:HGNC:9287]	2.58359	5.9943
ENSG00000204389	3303	HSPA1A	protein_coding	HGNC Symbol	2	heat shock protein family A (Hsp70) member 1A [Source:HGNC Symbol;Acc:HGNC:5232]	2.58487	5.99963
ENSG00000162409	5563	PRKAA2	protein_coding	HGNC Symbol	2	protein kinase AMP-activated catalytic subunit alpha 2 [Source:HGNC Symbol;Acc:HGNC:9377]	2.58593	6.00402
ENSG00000130032	79057	PRRG3	protein_coding	HGNC Symbol	9	proline rich and Gla domain 3 [Source:HGNC Symbol;Acc:HGNC:30798]	2.58812	6.01313
ENSG00000143847	8497	PPFIA4	protein_coding	HGNC Symbol	13	PTPRF interacting protein alpha 4 [Source:HGNC Symbol;Acc:HGNC:9248]	2.58911	6.01729
ENSG00000121797	9034	CCRL2	protein_coding	HGNC Symbol	7	C-C motif chemokine receptor like 2 [Source:HGNC Symbol;Acc:HGNC:1612]	2.59062	6.02359
ENSG00000120129	1843	DUSP1	protein_coding	HGNC Symbol	1	dual specificity phosphatase 1 [Source:HGNC Symbol;Acc:HGNC:3064]	2.5914	6.02683
ENSG00000106123	2051	EPHB6	protein_coding	HGNC Symbol	12	EPH receptor B6 [Source:HGNC Symbol;Acc:HGNC:3396]	2.59449	6.03974
ENSG00000080573	50509	COL5A3	protein_coding	HGNC Symbol	2	collagen type V alpha 3 chain [Source:HGNC Symbol;Acc:HGNC:14864]	2.59566	6.04464
ENSG00000178718	54913	RPP25	protein_coding	HGNC Symbol	1	ribonuclease P and MRP subunit p25 [Source:HGNC Symbol;Acc:HGNC:30361]	2.59568	6.04475
ENSG00000172731	55222	LRRC20	protein_coding	HGNC Symbol	7	leucine rich repeat containing 20 [Source:HGNC Symbol;Acc:HGNC:23421]	2.59585	6.04546
ENSG00000103942	9455	HOMER2	protein_coding	HGNC Symbol	10	homer scaffold protein 2 [Source:HGNC Symbol;Acc:HGNC:17513]	2.5962	6.04691
ENSG00000078725	1620	BRINP1	protein_coding	HGNC Symbol	3	BMP/retinoic acid inducible neural specific 1 [Source:HGNC Symbol;Acc:HGNC:2687]	2.5971	6.0507
ENSG00000145506	85409	NKD2	protein_coding	HGNC Symbol	5	NKD inhibitor of WNT signaling pathway 2 [Source:HGNC Symbol;Acc:HGNC:17046]	2.59728	6.05145
ENSG00000158966	57685	CACHD1	protein_coding	HGNC Symbol	6	cache domain containing 1 [Source:HGNC Symbol;Acc:HGNC:29314]	2.60004	6.06302
ENSG00000164509	133396	IL31RA	protein_coding	HGNC Symbol	13	interleukin 31 receptor A [Source:HGNC Symbol;Acc:HGNC:18969]	2.60226	6.07236
ENSG00000136114	55901	THSD1	protein_coding	HGNC Symbol	3	thrombospondin type 1 domain containing 1 [Source:HGNC Symbol;Acc:HGNC:17754]	2.60609	6.08853
ENSG00000163884	28999	KLF15	protein_coding	HGNC Symbol	2	Kruppel like factor 15 [Source:HGNC Symbol;Acc:HGNC:14536]	2.61214	6.11409
ENSG00000167306	4645	MYO5B	protein_coding	HGNC Symbol	7	myosin VB [Source:HGNC Symbol;Acc:HGNC:7603]	2.61413	6.12255
ENSG00000251127	NA	AC091173.1	lncRNA	Clone-based (Ensembl) gene	1	novel transcript	2.61832	6.14036
ENSG00000181773	2827	GPR3	protein_coding	HGNC Symbol	1	G protein-coupled receptor 3 [Source:HGNC Symbol;Acc:HGNC:4484]	2.61998	6.1474
ENSG00000261649	728310	GOLGA6L7	protein_coding	HGNC Symbol	2	golgin A6 family like 7 [Source:HGNC Symbol;Acc:HGNC:37442]	2.62044	6.14939
ENSG00000115008	3552	IL1A	protein_coding	HGNC Symbol	1	interleukin 1 alpha [Source:HGNC Symbol;Acc:HGNC:5991]	2.62355	6.16266
ENSG00000251636	NA	LINC01218	lncRNA	HGNC Symbol	1	long intergenic non-protein coding RNA 1218 [Source:HGNC Symbol;Acc:HGNC:41420]	2.62668	6.17601
ENSG00000168939	10251	SPRY3	protein_coding	HGNC Symbol	1	sprouty RTK signaling antagonist 3 [Source:HGNC Symbol;Acc:HGNC:11271]	2.62681	6.17658
ENSG00000183760	390928	ACP7	protein_coding	HGNC Symbol	4	acid phosphatase 7, tartrate resistant (putative) [Source:HGNC Symbol;Acc:HGNC:33781]	2.62692	6.17706
ENSG00000188818	79844	ZDHHC11	protein_coding	HGNC Symbol	11	zinc finger DHHC-type containing 11 [Source:HGNC Symbol;Acc:HGNC:19158]	2.62886	6.18538
ENSG00000175170	NA	FAM182B	lncRNA	HGNC Symbol	22	family with sequence similarity 182 member B [Source:HGNC Symbol;Acc:HGNC:34503]	2.63078	6.19363
ENSG00000081052	1286	COL4A4	protein_coding	HGNC Symbol	2	collagen type IV alpha 4 chain [Source:HGNC Symbol;Acc:HGNC:2206]	2.63121	6.19544
ENSG00000155980	3798	KIF5A	protein_coding	HGNC Symbol	3	kinesin family member 5A [Source:HGNC Symbol;Acc:HGNC:6323]	2.63238	6.20049
ENSG00000175352	56675	NRIP3	protein_coding	HGNC Symbol	5	nuclear receptor interacting protein 3 [Source:HGNC Symbol;Acc:HGNC:1167]	2.63884	6.2283
ENSG00000224321	NA	RPL12P14	processed_pseudogene	HGNC Symbol	1	ribosomal protein L12 pseudogene 14 [Source:HGNC Symbol;Acc:HGNC:36495]	2.6412	6.23851
ENSG00000196220	9901	SRGAP3	protein_coding	HGNC Symbol	13	SLIT-ROBO Rho GTPase activating protein 3 [Source:HGNC Symbol;Acc:HGNC:19744]	2.64125	6.23874
ENSG00000270842	NA	AC073413.2	processed_pseudogene	Clone-based (Ensembl) gene	1	ribosomal protein S26 (RPS26) pseudogene	2.64195	6.24173
ENSG00000180638	146802	SLC47A2	protein_coding	HGNC Symbol	10	solute carrier family 47 member 2 [Source:HGNC Symbol;Acc:HGNC:26439]	2.64404	6.2508
ENSG00000188613	340719	NANOS1	protein_coding	HGNC Symbol	2	nanos C2HC-type zinc finger 1 [Source:HGNC Symbol;Acc:HGNC:23044]	2.64897	6.27219
ENSG00000187994	126432	RINL	protein_coding	HGNC Symbol	10	Ras and Rab interactor like [Source:HGNC Symbol;Acc:HGNC:24795]	2.65107	6.28133
ENSG00000203808	NA	BVES-AS1	lncRNA	HGNC Symbol	15	BVES antisense RNA 1 [Source:HGNC Symbol;Acc:HGNC:21223]	2.65458	6.29664
ENSG00000197249	5265	SERPINA1	protein_coding	HGNC Symbol	20	serpin family A member 1 [Source:HGNC Symbol;Acc:HGNC:8941]	2.65549	6.3006
ENSG00000165209	55342	STRBP	protein_coding	HGNC Symbol	10	spermatid perinuclear RNA binding protein [Source:HGNC Symbol;Acc:HGNC:16462]	2.65954	6.31831
ENSG00000163673	85443	DCLK3	protein_coding	HGNC Symbol	3	doublecortin like kinase 3 [Source:HGNC Symbol;Acc:HGNC:19005]	2.66122	6.32567
ENSG00000176597	84002	B3GNT5	protein_coding	HGNC Symbol	12	UDP-GlcNAc:betaGal beta-1,3-N-acetylglucosaminyltransferase 5 [Source:HGNC Symbol;Acc:HGNC:15684]	2.6614	6.32645
ENSG00000102003	6855	SYP	protein_coding	HGNC Symbol	8	synaptophysin [Source:HGNC Symbol;Acc:HGNC:11506]	2.66225	6.33019
ENSG00000251460	NA	AC097381.2	lncRNA	Clone-based (Ensembl) gene	1	novel transcript	2.66399	6.33784
ENSG00000181409	9625	AATK	protein_coding	HGNC Symbol	11	apoptosis associated tyrosine kinase [Source:HGNC Symbol;Acc:HGNC:21]	2.66574	6.34554
ENSG00000118402	6785	ELOVL4	protein_coding	HGNC Symbol	1	ELOVL fatty acid elongase 4 [Source:HGNC Symbol;Acc:HGNC:14415]	2.66595	6.34643
ENSG00000258896	NA	SCOCP1	processed_pseudogene	HGNC Symbol	1	short coiled-coil protein pseudogene 1 [Source:HGNC Symbol;Acc:HGNC:20339]	2.67045	6.36626
ENSG00000128298	80115	BAIAP2L2	protein_coding	HGNC Symbol	3	BAR/IMD domain containing adaptor protein 2 like 2 [Source:HGNC Symbol;Acc:HGNC:26203]	2.67057	6.36679
ENSG00000164684	619279	ZNF704	protein_coding	HGNC Symbol	6	zinc finger protein 704 [Source:HGNC Symbol;Acc:HGNC:32291]	2.67158	6.37125
ENSG00000177508	79191	IRX3	protein_coding	HGNC Symbol	3	iroquois homeobox 3 [Source:HGNC Symbol;Acc:HGNC:14360]	2.67387	6.38139
ENSG00000062524	4058	LTK	protein_coding	HGNC Symbol	6	leukocyte receptor tyrosine kinase [Source:HGNC Symbol;Acc:HGNC:6721]	2.6739	6.38151
ENSG00000099937	3053	SERPIND1	protein_coding	HGNC Symbol	2	serpin family D member 1 [Source:HGNC Symbol;Acc:HGNC:4838]	2.67549	6.38855
ENSG00000095209	55151	TMEM38B	protein_coding	HGNC Symbol	5	transmembrane protein 38B [Source:HGNC Symbol;Acc:HGNC:25535]	2.6764	6.39257
ENSG00000261342	NA	AC006538.1	lncRNA	Clone-based (Ensembl) gene	1	novel transcript	2.67849	6.40187
ENSG00000105427	84518	CNFN	protein_coding	HGNC Symbol	2	cornifelin [Source:HGNC Symbol;Acc:HGNC:30183]	2.68484	6.43008
ENSG00000172889	51162	EGFL7	protein_coding	HGNC Symbol	7	EGF like domain multiple 7 [Source:HGNC Symbol;Acc:HGNC:20594]	2.68881	6.44784
ENSG00000165124	79987	SVEP1	protein_coding	HGNC Symbol	5	sushi, von Willebrand factor type A, EGF and pentraxin domain containing 1 [Source:HGNC Symbol;Acc:HGNC:15985]	2.68901	6.4487
ENSG00000236816	NA	ANKRD20A7P	transcribed_unprocessed_pseudogene	HGNC Symbol	6	ankyrin repeat domain 20 family member A7, pseudogene [Source:HGNC Symbol;Acc:HGNC:31980]	2.69213	6.46267
ENSG00000170965	10761	PLAC1	protein_coding	HGNC Symbol	4	placenta enriched 1 [Source:HGNC Symbol;Acc:HGNC:9044]	2.69403	6.47119
ENSG00000186862	79955	PDZD7	protein_coding	HGNC Symbol	9	PDZ domain containing 7 [Source:HGNC Symbol;Acc:HGNC:26257]	2.69915	6.49421
ENSG00000187764	10507	SEMA4D	protein_coding	HGNC Symbol	24	semaphorin 4D [Source:HGNC Symbol;Acc:HGNC:10732]	2.69938	6.49523
ENSG00000182247	7325	UBE2E2	protein_coding	HGNC Symbol	7	ubiquitin conjugating enzyme E2 E2 [Source:HGNC Symbol;Acc:HGNC:12478]	2.70046	6.50011
ENSG00000171680	57449	PLEKHG5	protein_coding	HGNC Symbol	13	pleckstrin homology and RhoGEF domain containing G5 [Source:HGNC Symbol;Acc:HGNC:29105]	2.70917	6.53944
ENSG00000177692	54943	DNAJC28	protein_coding	HGNC Symbol	4	DnaJ heat shock protein family (Hsp40) member C28 [Source:HGNC Symbol;Acc:HGNC:1297]	2.71082	6.54695
ENSG00000217825	NA	AC099552.1	lncRNA	Clone-based (Ensembl) gene	2	novel transcript	2.71178	6.55128
ENSG00000165556	1045	CDX2	protein_coding	HGNC Symbol	2	caudal type homeobox 2 [Source:HGNC Symbol;Acc:HGNC:1806]	2.71607	6.57082
ENSG00000073670	4185	ADAM11	protein_coding	HGNC Symbol	5	ADAM metallopeptidase domain 11 [Source:HGNC Symbol;Acc:HGNC:189]	2.71761	6.57782
ENSG00000163735	6374	CXCL5	protein_coding	HGNC Symbol	1	C-X-C motif chemokine ligand 5 [Source:HGNC Symbol;Acc:HGNC:10642]	2.71879	6.58322
ENSG00000169193	90693	CCDC126	protein_coding	HGNC Symbol	8	coiled-coil domain containing 126 [Source:HGNC Symbol;Acc:HGNC:22398]	2.71974	6.58754
ENSG00000118971	894	CCND2	protein_coding	HGNC Symbol	4	cyclin D2 [Source:HGNC Symbol;Acc:HGNC:1583]	2.72179	6.59689
ENSG00000072954	79041	TMEM38A	protein_coding	HGNC Symbol	3	transmembrane protein 38A [Source:HGNC Symbol;Acc:HGNC:28462]	2.72533	6.61312
ENSG00000123191	540	ATP7B	protein_coding	HGNC Symbol	26	ATPase copper transporting beta [Source:HGNC Symbol;Acc:HGNC:870]	2.72618	6.617
ENSG00000170214	147	ADRA1B	protein_coding	HGNC Symbol	3	adrenoceptor alpha 1B [Source:HGNC Symbol;Acc:HGNC:278]	2.72622	6.61722
ENSG00000143061	3321	IGSF3	protein_coding	HGNC Symbol	4	immunoglobulin superfamily member 3 [Source:HGNC Symbol;Acc:HGNC:5950]	2.72661	6.619
ENSG00000172318	8708	B3GALT1	protein_coding	HGNC Symbol	1	beta-1,3-galactosyltransferase 1 [Source:HGNC Symbol;Acc:HGNC:916]	2.7307	6.63776
ENSG00000135678	1368	CPM	protein_coding	HGNC Symbol	13	carboxypeptidase M [Source:HGNC Symbol;Acc:HGNC:2311]	2.73289	6.64784
ENSG00000135439	116986	AGAP2	protein_coding	HGNC Symbol	4	ArfGAP with GTPase domain, ankyrin repeat and PH domain 2 [Source:HGNC Symbol;Acc:HGNC:16921]	2.73357	6.65097
ENSG00000147573	84675	TRIM55	protein_coding	HGNC Symbol	5	tripartite motif containing 55 [Source:HGNC Symbol;Acc:HGNC:14215]	2.73633	6.66372
ENSG00000156675	80223	RAB11FIP1	protein_coding	HGNC Symbol	6	RAB11 family interacting protein 1 [Source:HGNC Symbol;Acc:HGNC:30265]	2.73813	6.67205
ENSG00000165272	360	AQP3	protein_coding	HGNC Symbol	7	aquaporin 3 (Gill blood group) [Source:HGNC Symbol;Acc:HGNC:636]	2.74151	6.68768
ENSG00000100060	4242	MFNG	protein_coding	HGNC Symbol	10	MFNG O-fucosylpeptide 3-beta-N-acetylglucosaminyltransferase [Source:HGNC Symbol;Acc:HGNC:7038]	2.74182	6.68913
ENSG00000244738	NA	AC026316.3	lncRNA	Clone-based (Ensembl) gene	1	novel transcript	2.74241	6.69186
ENSG00000132970	10810	WASF3	protein_coding	HGNC Symbol	4	WASP family member 3 [Source:HGNC Symbol;Acc:HGNC:12734]	2.74298	6.69453
ENSG00000102760	28984	RGCC	protein_coding	HGNC Symbol	2	regulator of cell cycle [Source:HGNC Symbol;Acc:HGNC:20369]	2.74394	6.69898
ENSG00000005961	3674	ITGA2B	protein_coding	HGNC Symbol	10	integrin subunit alpha 2b [Source:HGNC Symbol;Acc:HGNC:6138]	2.74522	6.70491
ENSG00000183914	146754	DNAH2	protein_coding	HGNC Symbol	6	dynein axonemal heavy chain 2 [Source:HGNC Symbol;Acc:HGNC:2948]	2.7477	6.71647
ENSG00000226846	NA	LINC00348	lncRNA	HGNC Symbol	19	long intergenic non-protein coding RNA 348 [Source:HGNC Symbol;Acc:HGNC:42658]	2.74895	6.72226
ENSG00000261488	NA	TBILA	lncRNA	HGNC Symbol	1	TGF-beta induced lncRNA [Source:HGNC Symbol;Acc:HGNC:53943]	2.75112	6.7324
ENSG00000250241	NA	AC105383.1	lncRNA	Clone-based (Ensembl) gene	14	novel transcript	2.75178	6.73548
ENSG00000258636	NA	AL121821.2	lncRNA	Clone-based (Ensembl) gene	2	novel transcript	2.75223	6.73759
ENSG00000247796	NA	AC008966.1	lncRNA	Clone-based (Ensembl) gene	10	novel transcript, antisense to MOCS2	2.75552	6.75294
ENSG00000205269	100113407	TMEM170B	protein_coding	HGNC Symbol	1	transmembrane protein 170B [Source:HGNC Symbol;Acc:HGNC:34244]	2.75709	6.76033
ENSG00000127328	117177	RAB3IP	protein_coding	HGNC Symbol	18	RAB3A interacting protein [Source:HGNC Symbol;Acc:HGNC:16508]	2.75803	6.76474
ENSG00000172927	26579	MYEOV	protein_coding	HGNC Symbol	12	myeloma overexpressed [Source:HGNC Symbol;Acc:HGNC:7563]	2.76195	6.78311
ENSG00000178038	259173	ALS2CL	protein_coding	HGNC Symbol	10	ALS2 C-terminal like [Source:HGNC Symbol;Acc:HGNC:20605]	2.76218	6.7842
ENSG00000159167	6781	STC1	protein_coding	HGNC Symbol	2	stanniocalcin 1 [Source:HGNC Symbol;Acc:HGNC:11373]	2.76594	6.80192
ENSG00000130561	6295	SAG	protein_coding	HGNC Symbol	16	S-antigen visual arrestin [Source:HGNC Symbol;Acc:HGNC:10521]	2.76885	6.81563
ENSG00000111859	4739	NEDD9	protein_coding	HGNC Symbol	16	neural precursor cell expressed, developmentally down-regulated 9 [Source:HGNC Symbol;Acc:HGNC:7733]	2.77052	6.82354
ENSG00000164199	84059	ADGRV1	protein_coding	HGNC Symbol	37	adhesion G protein-coupled receptor V1 [Source:HGNC Symbol;Acc:HGNC:17416]	2.77167	6.829
ENSG00000065618	1308	COL17A1	protein_coding	HGNC Symbol	10	collagen type XVII alpha 1 chain [Source:HGNC Symbol;Acc:HGNC:2194]	2.77318	6.83612
ENSG00000103034	65009	NDRG4	protein_coding	HGNC Symbol	55	NDRG family member 4 [Source:HGNC Symbol;Acc:HGNC:14466]	2.77759	6.85708
ENSG00000182809	1397	CRIP2	protein_coding	HGNC Symbol	11	cysteine rich protein 2 [Source:HGNC Symbol;Acc:HGNC:2361]	2.78365	6.88592
ENSG00000214121	NA	PRDX1P1	processed_pseudogene	HGNC Symbol	1	peroxiredoxin 1 pseudogene 1 [Source:HGNC Symbol;Acc:HGNC:11711]	2.78439	6.88944
ENSG00000006740	9912	ARHGAP44	protein_coding	HGNC Symbol	12	Rho GTPase activating protein 44 [Source:HGNC Symbol;Acc:HGNC:29096]	2.78556	6.89502
ENSG00000158769	50848	F11R	protein_coding	HGNC Symbol	6	F11 receptor [Source:HGNC Symbol;Acc:HGNC:14685]	2.78773	6.90544
ENSG00000217801	NA	AL390719.1	transcribed_unprocessed_pseudogene	Clone-based (Ensembl) gene	6	protein tyrosine phosphatase family pseudogene	2.78798	6.90662
ENSG00000186897	338761	C1QL4	protein_coding	HGNC Symbol	1	complement C1q like 4 [Source:HGNC Symbol;Acc:HGNC:31416]	2.79274	6.92945
ENSG00000084674	338	APOB	protein_coding	HGNC Symbol	4	apolipoprotein B [Source:HGNC Symbol;Acc:HGNC:603]	2.79373	6.93419
ENSG00000183971	283869	NPW	protein_coding	HGNC Symbol	2	neuropeptide W [Source:HGNC Symbol;Acc:HGNC:30509]	2.79478	6.93923
ENSG00000151729	291	SLC25A4	protein_coding	HGNC Symbol	2	solute carrier family 25 member 4 [Source:HGNC Symbol;Acc:HGNC:10990]	2.79845	6.95693
ENSG00000117600	9890	PLPPR4	protein_coding	HGNC Symbol	3	phospholipid phosphatase related 4 [Source:HGNC Symbol;Acc:HGNC:23496]	2.8	6.96442
ENSG00000087494	5744	PTHLH	protein_coding	HGNC Symbol	9	parathyroid hormone like hormone [Source:HGNC Symbol;Acc:HGNC:9607]	2.8025	6.97649
ENSG00000197181	55124	PIWIL2	protein_coding	HGNC Symbol	5	piwi like RNA-mediated gene silencing 2 [Source:HGNC Symbol;Acc:HGNC:17644]	2.80391	6.98332
ENSG00000136244	3569	IL6	protein_coding	HGNC Symbol	9	interleukin 6 [Source:HGNC Symbol;Acc:HGNC:6018]	2.81098	7.0176
ENSG00000243742	NA	RPLP0P2	transcribed_processed_pseudogene	HGNC Symbol	6	ribosomal protein lateral stalk subunit P0 pseudogene 2 [Source:HGNC Symbol;Acc:HGNC:17960]	2.81847	7.05413
ENSG00000164078	4486	MST1R	protein_coding	HGNC Symbol	15	macrophage stimulating 1 receptor [Source:HGNC Symbol;Acc:HGNC:7381]	2.82063	7.06472
ENSG00000188981	345222	MSANTD1	protein_coding	HGNC Symbol	4	Myb/SANT DNA binding domain containing 1 [Source:HGNC Symbol;Acc:HGNC:33741]	2.82134	7.0682
ENSG00000164061	8927	BSN	protein_coding	HGNC Symbol	2	bassoon presynaptic cytomatrix protein [Source:HGNC Symbol;Acc:HGNC:1117]	2.82404	7.08141
ENSG00000164142	729830	FAM160A1	protein_coding	HGNC Symbol	9	family with sequence similarity 160 member A1 [Source:HGNC Symbol;Acc:HGNC:34237]	2.82845	7.10309
ENSG00000198865	100129792	CCDC152	protein_coding	HGNC Symbol	2	coiled-coil domain containing 152 [Source:HGNC Symbol;Acc:HGNC:34438]	2.82855	7.10358
ENSG00000158258	64084	CLSTN2	protein_coding	HGNC Symbol	2	calsyntenin 2 [Source:HGNC Symbol;Acc:HGNC:17448]	2.82932	7.10739
ENSG00000199584	NA	AC025252.1	misc_RNA	Clone-based (Ensembl) gene	1		2.83071	7.11422
ENSG00000141540	94015	TTYH2	protein_coding	HGNC Symbol	9	tweety family member 2 [Source:HGNC Symbol;Acc:HGNC:13877]	2.83376	7.12928
ENSG00000022567	57210	SLC45A4	protein_coding	HGNC Symbol	6	solute carrier family 45 member 4 [Source:HGNC Symbol;Acc:HGNC:29196]	2.83568	7.13881
ENSG00000010310	2696	GIPR	protein_coding	HGNC Symbol	9	gastric inhibitory polypeptide receptor [Source:HGNC Symbol;Acc:HGNC:4271]	2.84187	7.1695
ENSG00000125740	2354	FOSB	protein_coding	HGNC Symbol	13	FosB proto-oncogene, AP-1 transcription factor subunit [Source:HGNC Symbol;Acc:HGNC:3797]	2.84287	7.17448
ENSG00000135519	23416	KCNH3	protein_coding	HGNC Symbol	5	potassium voltage-gated channel subfamily H member 3 [Source:HGNC Symbol;Acc:HGNC:6252]	2.84545	7.18729
ENSG00000120937	4879	NPPB	protein_coding	HGNC Symbol	1	natriuretic peptide B [Source:HGNC Symbol;Acc:HGNC:7940]	2.84581	7.18908
ENSG00000120949	943	TNFRSF8	protein_coding	HGNC Symbol	5	TNF receptor superfamily member 8 [Source:HGNC Symbol;Acc:HGNC:11923]	2.85089	7.21443
ENSG00000143028	284612	SYPL2	protein_coding	HGNC Symbol	2	synaptophysin like 2 [Source:HGNC Symbol;Acc:HGNC:27638]	2.85164	7.21822
ENSG00000158089	79623	GALNT14	protein_coding	HGNC Symbol	15	polypeptide N-acetylgalactosaminyltransferase 14 [Source:HGNC Symbol;Acc:HGNC:22946]	2.8521	7.2205
ENSG00000159314	201176	ARHGAP27	protein_coding	HGNC Symbol	19	Rho GTPase activating protein 27 [Source:HGNC Symbol;Acc:HGNC:31813]	2.85552	7.23763
ENSG00000184307	254887	ZDHHC23	protein_coding	HGNC Symbol	7	zinc finger DHHC-type palmitoyltransferase 23 [Source:HGNC Symbol;Acc:HGNC:28654]	2.85626	7.24133
ENSG00000186868	4137	MAPT	protein_coding	HGNC Symbol	18	microtubule associated protein tau [Source:HGNC Symbol;Acc:HGNC:6893]	2.85626	7.24135
ENSG00000267551	NA	AC005264.1	lncRNA	Clone-based (Ensembl) gene	1	novel transcript, antisense to GNA15	2.85838	7.252
ENSG00000095752	3589	IL11	protein_coding	HGNC Symbol	4	interleukin 11 [Source:HGNC Symbol;Acc:HGNC:5966]	2.85839	7.25207
ENSG00000175820	643677	CCDC168	protein_coding	HGNC Symbol	1	coiled-coil domain containing 168 [Source:HGNC Symbol;Acc:HGNC:26851]	2.86176	7.26902
ENSG00000270673	NA	YTHDF3-AS1	lncRNA	HGNC Symbol	1	YTHDF3 antisense RNA 1 (head to head) [Source:HGNC Symbol;Acc:HGNC:48728]	2.86783	7.29965
ENSG00000136828	9649	RALGPS1	protein_coding	HGNC Symbol	14	Ral GEF with PH domain and SH3 binding motif 1 [Source:HGNC Symbol;Acc:HGNC:16851]	2.87276	7.32466
ENSG00000129596	1036	CDO1	protein_coding	HGNC Symbol	4	cysteine dioxygenase type 1 [Source:HGNC Symbol;Acc:HGNC:1795]	2.87302	7.326
ENSG00000118997	56171	DNAH7	protein_coding	HGNC Symbol	8	dynein axonemal heavy chain 7 [Source:HGNC Symbol;Acc:HGNC:18661]	2.87751	7.34881
ENSG00000172201	3400	ID4	protein_coding	HGNC Symbol	1	inhibitor of DNA binding 4, HLH protein [Source:HGNC Symbol;Acc:HGNC:5363]	2.87766	7.34957
ENSG00000196329	55340	GIMAP5	protein_coding	HGNC Symbol	7	GTPase, IMAP family member 5 [Source:HGNC Symbol;Acc:HGNC:18005]	2.88109	7.36707
ENSG00000259523	NA	AC022613.2	lncRNA	Clone-based (Ensembl) gene	1	novel transcript, antisense to TJP1	2.88766	7.40071
ENSG00000133687	83857	TMTC1	protein_coding	HGNC Symbol	9	transmembrane O-mannosyltransferase targeting cadherins 1 [Source:HGNC Symbol;Acc:HGNC:24099]	2.88912	7.40819
ENSG00000108342	1440	CSF3	protein_coding	HGNC Symbol	9	colony stimulating factor 3 [Source:HGNC Symbol;Acc:HGNC:2438]	2.89284	7.42732
ENSG00000213904	NA	LIPE-AS1	lncRNA	HGNC Symbol	9	LIPE antisense RNA 1 [Source:HGNC Symbol;Acc:HGNC:48589]	2.89357	7.43109
ENSG00000158683	168507	PKD1L1	protein_coding	HGNC Symbol	5	polycystin 1 like 1, transient receptor potential channel interacting [Source:HGNC Symbol;Acc:HGNC:18053]	2.9003	7.46583
ENSG00000227736	NA	MTCO3P16	unprocessed_pseudogene	HGNC Symbol	1	MT-CO3 pseudogene 16 [Source:HGNC Symbol;Acc:HGNC:52046]	2.9003	7.46584
ENSG00000181418	23109	DDN	protein_coding	HGNC Symbol	1	dendrin [Source:HGNC Symbol;Acc:HGNC:24458]	2.90224	7.47588
ENSG00000138623	8482	SEMA7A	protein_coding	HGNC Symbol	4	semaphorin 7A (John Milton Hagen blood group) [Source:HGNC Symbol;Acc:HGNC:10741]	2.90363	7.48309
ENSG00000156886	3681	ITGAD	protein_coding	HGNC Symbol	3	integrin subunit alpha D [Source:HGNC Symbol;Acc:HGNC:6146]	2.90768	7.50413
ENSG00000182993	144608	C12orf60	protein_coding	HGNC Symbol	5	chromosome 12 open reading frame 60 [Source:HGNC Symbol;Acc:HGNC:28726]	2.90832	7.50743
ENSG00000142765	84958	SYTL1	protein_coding	HGNC Symbol	11	synaptotagmin like 1 [Source:HGNC Symbol;Acc:HGNC:15584]	2.91384	7.53623
ENSG00000143367	7286	TUFT1	protein_coding	HGNC Symbol	7	tuftelin 1 [Source:HGNC Symbol;Acc:HGNC:12422]	2.91805	7.55822
ENSG00000115602	9173	IL1RL1	protein_coding	HGNC Symbol	9	interleukin 1 receptor like 1 [Source:HGNC Symbol;Acc:HGNC:5998]	2.91853	7.56078
ENSG00000106789	7464	CORO2A	protein_coding	HGNC Symbol	2	coronin 2A [Source:HGNC Symbol;Acc:HGNC:2255]	2.91931	7.56483
ENSG00000186654	55615	PRR5	protein_coding	HGNC Symbol	18	proline rich 5 [Source:HGNC Symbol;Acc:HGNC:31682]	2.921	7.57371
ENSG00000167676	729359	PLIN4	protein_coding	HGNC Symbol	2	perilipin 4 [Source:HGNC Symbol;Acc:HGNC:29393]	2.92306	7.58454
ENSG00000277363	80725	SRCIN1	protein_coding	HGNC Symbol	9	SRC kinase signaling inhibitor 1 [Source:HGNC Symbol;Acc:HGNC:29506]	2.92379	7.58836
ENSG00000174292	8711	TNK1	protein_coding	HGNC Symbol	8	tyrosine kinase non receptor 1 [Source:HGNC Symbol;Acc:HGNC:11940]	2.92478	7.59358
ENSG00000253368	388610	TRNP1	protein_coding	HGNC Symbol	2	TMF1 regulated nuclear protein 1 [Source:HGNC Symbol;Acc:HGNC:34348]	2.9287	7.61421
ENSG00000006606	10344	CCL26	protein_coding	HGNC Symbol	2	C-C motif chemokine ligand 26 [Source:HGNC Symbol;Acc:HGNC:10625]	2.92982	7.62015
ENSG00000176387	3291	HSD11B2	protein_coding	HGNC Symbol	4	hydroxysteroid 11-beta dehydrogenase 2 [Source:HGNC Symbol;Acc:HGNC:5209]	2.93019	7.6221
ENSG00000123612	130399	ACVR1C	protein_coding	HGNC Symbol	4	activin A receptor type 1C [Source:HGNC Symbol;Acc:HGNC:18123]	2.93089	7.62581
ENSG00000131094	10882	C1QL1	protein_coding	HGNC Symbol	1	complement C1q like 1 [Source:HGNC Symbol;Acc:HGNC:24182]	2.93315	7.63775
ENSG00000120162	79817	MOB3B	protein_coding	HGNC Symbol	2	MOB kinase activator 3B [Source:HGNC Symbol;Acc:HGNC:23825]	2.93337	7.63893
ENSG00000151320	9472	AKAP6	protein_coding	HGNC Symbol	15	A-kinase anchoring protein 6 [Source:HGNC Symbol;Acc:HGNC:376]	2.93339	7.63902
ENSG00000269416	NA	LINC01224	lncRNA	HGNC Symbol	10	long intergenic non-protein coding RNA 1224 [Source:HGNC Symbol;Acc:HGNC:49676]	2.93366	7.64045
ENSG00000160111	27151	CPAMD8	protein_coding	HGNC Symbol	21	C3 and PZP like alpha-2-macroglobulin domain containing 8 [Source:HGNC Symbol;Acc:HGNC:23228]	2.93449	7.64487
ENSG00000132622	116835	HSPA12B	protein_coding	HGNC Symbol	2	heat shock protein family A (Hsp70) member 12B [Source:HGNC Symbol;Acc:HGNC:16193]	2.93755	7.66108
ENSG00000085552	57549	IGSF9	protein_coding	HGNC Symbol	6	immunoglobulin superfamily member 9 [Source:HGNC Symbol;Acc:HGNC:18132]	2.94567	7.70432
ENSG00000134115	27255	CNTN6	protein_coding	HGNC Symbol	6	contactin 6 [Source:HGNC Symbol;Acc:HGNC:2176]	2.95269	7.74193
ENSG00000088808	23368	PPP1R13B	protein_coding	HGNC Symbol	18	protein phosphatase 1 regulatory subunit 13B [Source:HGNC Symbol;Acc:HGNC:14950]	2.96033	7.78304
ENSG00000170396	91752	ZNF804A	protein_coding	HGNC Symbol	2	zinc finger protein 804A [Source:HGNC Symbol;Acc:HGNC:21711]	2.96544	7.81061
ENSG00000168528	347735	SERINC2	protein_coding	HGNC Symbol	6	serine incorporator 2 [Source:HGNC Symbol;Acc:HGNC:23231]	2.96641	7.81589
ENSG00000180921	286077	FAM83H	protein_coding	HGNC Symbol	3	family with sequence similarity 83 member H [Source:HGNC Symbol;Acc:HGNC:24797]	2.9724	7.84839
ENSG00000079263	11262	SP140	protein_coding	HGNC Symbol	14	SP140 nuclear body protein [Source:HGNC Symbol;Acc:HGNC:17133]	2.97857	7.88207
ENSG00000095397	25861	WHRN	protein_coding	HGNC Symbol	8	whirlin [Source:HGNC Symbol;Acc:HGNC:16361]	2.97995	7.88961
ENSG00000185015	377677	CA13	protein_coding	HGNC Symbol	5	carbonic anhydrase 13 [Source:HGNC Symbol;Acc:HGNC:14914]	2.98175	7.89941
ENSG00000122574	644150	WIPF3	protein_coding	HGNC Symbol	3	WAS/WASL interacting protein family member 3 [Source:HGNC Symbol;Acc:HGNC:22004]	2.98238	7.90287
ENSG00000173175	111	ADCY5	protein_coding	HGNC Symbol	10	adenylate cyclase 5 [Source:HGNC Symbol;Acc:HGNC:236]	2.98355	7.90928
ENSG00000144481	79054	TRPM8	protein_coding	HGNC Symbol	14	transient receptor potential cation channel subfamily M member 8 [Source:HGNC Symbol;Acc:HGNC:17961]	2.98691	7.92775
ENSG00000185686	23532	PRAME	protein_coding	HGNC Symbol	14	preferentially expressed antigen in melanoma [Source:HGNC Symbol;Acc:HGNC:9336]	2.98777	7.93246
ENSG00000178187	285676	ZNF454	protein_coding	HGNC Symbol	3	zinc finger protein 454 [Source:HGNC Symbol;Acc:HGNC:21200]	2.98884	7.93834
ENSG00000073464	1183	CLCN4	protein_coding	HGNC Symbol	4	chloride voltage-gated channel 4 [Source:HGNC Symbol;Acc:HGNC:2022]	2.98925	7.9406
ENSG00000110675	55531	ELMOD1	protein_coding	HGNC Symbol	7	ELMO domain containing 1 [Source:HGNC Symbol;Acc:HGNC:25334]	2.99179	7.95458
ENSG00000184156	3786	KCNQ3	protein_coding	HGNC Symbol	8	potassium voltage-gated channel subfamily Q member 3 [Source:HGNC Symbol;Acc:HGNC:6297]	2.99757	7.98655
ENSG00000136286	64005	MYO1G	protein_coding	HGNC Symbol	8	myosin IG [Source:HGNC Symbol;Acc:HGNC:13880]	2.99826	7.99037
ENSG00000274528	NA	AC090970.2	lncRNA	Clone-based (Ensembl) gene	1	novel transcript	3.00371	8.02062
ENSG00000173868	162466	PHOSPHO1	protein_coding	HGNC Symbol	7	phosphoethanolamine/phosphocholine phosphatase 1 [Source:HGNC Symbol;Acc:HGNC:16815]	3.00405	8.02247
ENSG00000276900	NA	AC023157.2	lncRNA	Clone-based (Ensembl) gene	1	novel transcript, antisense to AMN1	3.00542	8.03014
ENSG00000269837	NA	IPO5P1	transcribed_processed_pseudogene	HGNC Symbol	2	importin 5 pseudogene 1 [Source:HGNC Symbol;Acc:HGNC:49687]	3.00844	8.04695
ENSG00000183150	2842	GPR19	protein_coding	HGNC Symbol	6	G protein-coupled receptor 19 [Source:HGNC Symbol;Acc:HGNC:4473]	3.00897	8.04991
ENSG00000142347	4542	MYO1F	protein_coding	HGNC Symbol	22	myosin IF [Source:HGNC Symbol;Acc:HGNC:7600]	3.01001	8.05568
ENSG00000137265	3662	IRF4	protein_coding	HGNC Symbol	5	interferon regulatory factor 4 [Source:HGNC Symbol;Acc:HGNC:6119]	3.01098	8.0611
ENSG00000101187	28231	SLCO4A1	protein_coding	HGNC Symbol	9	solute carrier organic anion transporter family member 4A1 [Source:HGNC Symbol;Acc:HGNC:10953]	3.01467	8.08175
ENSG00000163239	126668	TDRD10	protein_coding	HGNC Symbol	5	tudor domain containing 10 [Source:HGNC Symbol;Acc:HGNC:25316]	3.01806	8.1008
ENSG00000185668	5453	POU3F1	protein_coding	HGNC Symbol	1	POU class 3 homeobox 1 [Source:HGNC Symbol;Acc:HGNC:9214]	3.0213	8.119
ENSG00000131773	10656	KHDRBS3	protein_coding	HGNC Symbol	12	KH RNA binding domain containing, signal transduction associated 3 [Source:HGNC Symbol;Acc:HGNC:18117]	3.02471	8.13821
ENSG00000111879	79632	FAM184A	protein_coding	HGNC Symbol	14	family with sequence similarity 184 member A [Source:HGNC Symbol;Acc:HGNC:20991]	3.02778	8.15555
ENSG00000124159	8785	MATN4	protein_coding	HGNC Symbol	5	matrilin 4 [Source:HGNC Symbol;Acc:HGNC:6910]	3.03053	8.17111
ENSG00000166016	25841	ABTB2	protein_coding	HGNC Symbol	2	ankyrin repeat and BTB domain containing 2 [Source:HGNC Symbol;Acc:HGNC:23842]	3.03069	8.17199
ENSG00000123358	3164	NR4A1	protein_coding	HGNC Symbol	22	nuclear receptor subfamily 4 group A member 1 [Source:HGNC Symbol;Acc:HGNC:7980]	3.03289	8.18447
ENSG00000180448	23526	ARHGAP45	protein_coding	HGNC Symbol	16	Rho GTPase activating protein 45 [Source:HGNC Symbol;Acc:HGNC:17102]	3.0343	8.19248
ENSG00000118972	8074	FGF23	protein_coding	HGNC Symbol	2	fibroblast growth factor 23 [Source:HGNC Symbol;Acc:HGNC:3680]	3.03856	8.2167
ENSG00000136425	10518	CIB2	protein_coding	HGNC Symbol	10	calcium and integrin binding family member 2 [Source:HGNC Symbol;Acc:HGNC:24579]	3.03925	8.22066
ENSG00000249550	NA	LINC01234	lncRNA	HGNC Symbol	17	long intergenic non-protein coding RNA 1234 [Source:HGNC Symbol;Acc:HGNC:49757]	3.03954	8.22229
ENSG00000137142	347252	IGFBPL1	protein_coding	HGNC Symbol	1	insulin like growth factor binding protein like 1 [Source:HGNC Symbol;Acc:HGNC:20081]	3.03965	8.22293
ENSG00000125462	10485	C1orf61	protein_coding	HGNC Symbol	33	chromosome 1 open reading frame 61 [Source:HGNC Symbol;Acc:HGNC:30780]	3.04067	8.22873
ENSG00000250748	NA	AC025419.1	lncRNA	Clone-based (Ensembl) gene	10	novel transcript	3.05128	8.28945
ENSG00000204791	NA	SMPD5	transcribed_unitary_pseudogene	HGNC Symbol	2	sphingomyelin phosphodiesterase 5, pseudogene [Source:HGNC Symbol;Acc:HGNC:52275]	3.05149	8.29068
ENSG00000167646	352909	DNAAF3	protein_coding	HGNC Symbol	17	dynein axonemal assembly factor 3 [Source:HGNC Symbol;Acc:HGNC:30492]	3.05338	8.30157
ENSG00000069188	54549	SDK2	protein_coding	HGNC Symbol	5	sidekick cell adhesion molecule 2 [Source:HGNC Symbol;Acc:HGNC:19308]	3.0536	8.30283
ENSG00000228175	NA	GEMIN8P4	processed_pseudogene	HGNC Symbol	1	gem nuclear organelle associated protein 8 pseudogene 4 [Source:HGNC Symbol;Acc:HGNC:37979]	3.0557	8.31489
ENSG00000232453	NA	LINC02777	lncRNA	HGNC Symbol	10	long intergenic non-protein coding RNA 2777 [Source:HGNC Symbol;Acc:HGNC:54297]	3.05965	8.33771
ENSG00000163235	7039	TGFA	protein_coding	HGNC Symbol	9	transforming growth factor alpha [Source:HGNC Symbol;Acc:HGNC:11765]	3.06008	8.3402
ENSG00000178053	4291	MLF1	protein_coding	HGNC Symbol	22	myeloid leukemia factor 1 [Source:HGNC Symbol;Acc:HGNC:7125]	3.06223	8.35262
ENSG00000130203	348	APOE	protein_coding	HGNC Symbol	5	apolipoprotein E [Source:HGNC Symbol;Acc:HGNC:613]	3.06322	8.35833
ENSG00000184347	6586	SLIT3	protein_coding	HGNC Symbol	8	slit guidance ligand 3 [Source:HGNC Symbol;Acc:HGNC:11087]	3.06596	8.37427
ENSG00000139971	145407	ARMH4	protein_coding	HGNC Symbol	6	armadillo like helical domain containing 4 [Source:HGNC Symbol;Acc:HGNC:19846]	3.07036	8.39983
ENSG00000153930	162282	ANKFN1	protein_coding	HGNC Symbol	10	ankyrin repeat and fibronectin type III domain containing 1 [Source:HGNC Symbol;Acc:HGNC:26766]	3.07136	8.40566
ENSG00000186205	64757	MTARC1	protein_coding	HGNC Symbol	7	mitochondrial amidoxime reducing component 1 [Source:HGNC Symbol;Acc:HGNC:26189]	3.07305	8.41549
ENSG00000159247	NA	TUBBP5	transcribed_unprocessed_pseudogene	HGNC Symbol	4	tubulin beta pseudogene 5 [Source:HGNC Symbol;Acc:HGNC:23674]	3.07849	8.44729
ENSG00000250479	400916	CHCHD10	protein_coding	HGNC Symbol	5	coiled-coil-helix-coiled-coil-helix domain containing 10 [Source:HGNC Symbol;Acc:HGNC:15559]	3.08072	8.46037
ENSG00000178623	2859	GPR35	protein_coding	HGNC Symbol	5	G protein-coupled receptor 35 [Source:HGNC Symbol;Acc:HGNC:4492]	3.08223	8.46925
ENSG00000119771	114818	KLHL29	protein_coding	HGNC Symbol	4	kelch like family member 29 [Source:HGNC Symbol;Acc:HGNC:29404]	3.08227	8.46945
ENSG00000251644	NA	HPRT1P1	processed_pseudogene	HGNC Symbol	1	hypoxanthine phosphoribosyltransferase 1 pseudogene 1 [Source:HGNC Symbol;Acc:HGNC:51622]	3.08355	8.47697
ENSG00000265800	NA	AC022211.4	lncRNA	Clone-based (Ensembl) gene	1	novel transcript, sense intronic to HN1	3.08532	8.48739
ENSG00000173890	26996	GPR160	protein_coding	HGNC Symbol	10	G protein-coupled receptor 160 [Source:HGNC Symbol;Acc:HGNC:23693]	3.08701	8.49735
ENSG00000163536	5274	SERPINI1	protein_coding	HGNC Symbol	7	serpin family I member 1 [Source:HGNC Symbol;Acc:HGNC:8943]	3.09028	8.51663
ENSG00000081818	56131	PCDHB4	protein_coding	HGNC Symbol	2	protocadherin beta 4 [Source:HGNC Symbol;Acc:HGNC:8689]	3.09054	8.51817
ENSG00000106633	2645	GCK	protein_coding	HGNC Symbol	12	glucokinase [Source:HGNC Symbol;Acc:HGNC:4195]	3.09133	8.52283
ENSG00000215267	NA	AKR1C7P	transcribed_unprocessed_pseudogene	HGNC Symbol	2	aldo-keto reductase family 1 member C7, pseudogene [Source:HGNC Symbol;Acc:HGNC:44681]	3.09377	8.53725
ENSG00000167105	162461	TMEM92	protein_coding	HGNC Symbol	3	transmembrane protein 92 [Source:HGNC Symbol;Acc:HGNC:26579]	3.09963	8.57197
ENSG00000076944	6813	STXBP2	protein_coding	HGNC Symbol	22	syntaxin binding protein 2 [Source:HGNC Symbol;Acc:HGNC:11445]	3.09963	8.57201
ENSG00000135898	9290	GPR55	protein_coding	HGNC Symbol	6	G protein-coupled receptor 55 [Source:HGNC Symbol;Acc:HGNC:4511]	3.10069	8.57828
ENSG00000198879	57713	SFMBT2	protein_coding	HGNC Symbol	5	Scm like with four mbt domains 2 [Source:HGNC Symbol;Acc:HGNC:20256]	3.10126	8.58165
ENSG00000167972	21	ABCA3	protein_coding	HGNC Symbol	6	ATP binding cassette subfamily A member 3 [Source:HGNC Symbol;Acc:HGNC:33]	3.10219	8.58724
ENSG00000115194	7781	SLC30A3	protein_coding	HGNC Symbol	10	solute carrier family 30 member 3 [Source:HGNC Symbol;Acc:HGNC:11014]	3.10376	8.59654
ENSG00000174938	26470	SEZ6L2	protein_coding	HGNC Symbol	9	seizure related 6 homolog like 2 [Source:HGNC Symbol;Acc:HGNC:30844]	3.10467	8.60196
ENSG00000106511	4223	MEOX2	protein_coding	HGNC Symbol	1	mesenchyme homeobox 2 [Source:HGNC Symbol;Acc:HGNC:7014]	3.11255	8.64911
ENSG00000164220	2151	F2RL2	protein_coding	HGNC Symbol	2	coagulation factor II thrombin receptor like 2 [Source:HGNC Symbol;Acc:HGNC:3539]	3.11942	8.69037
ENSG00000248596	NA	AC139491.2	lncRNA	Clone-based (Ensembl) gene	1	novel transcript	3.11962	8.69157
ENSG00000170011	25924	MYRIP	protein_coding	HGNC Symbol	10	myosin VIIA and Rab interacting protein [Source:HGNC Symbol;Acc:HGNC:19156]	3.11981	8.69271
ENSG00000142677	58985	IL22RA1	protein_coding	HGNC Symbol	1	interleukin 22 receptor subunit alpha 1 [Source:HGNC Symbol;Acc:HGNC:13700]	3.1204	8.69629
ENSG00000185664	6490	PMEL	protein_coding	HGNC Symbol	19	premelanosome protein [Source:HGNC Symbol;Acc:HGNC:10880]	3.12561	8.72775
ENSG00000121895	80008	TMEM156	protein_coding	HGNC Symbol	4	transmembrane protein 156 [Source:HGNC Symbol;Acc:HGNC:26260]	3.12684	8.73521
ENSG00000118523	1490	CCN2	protein_coding	HGNC Symbol	1	cellular communication network factor 2 [Source:HGNC Symbol;Acc:HGNC:2500]	3.13068	8.75849
ENSG00000249628	NA	LINC00942	lncRNA	HGNC Symbol	1	long intergenic non-protein coding RNA 942 [Source:HGNC Symbol;Acc:HGNC:48636]	3.13743	8.79955
ENSG00000253125	NA	AC055854.1	lncRNA	Clone-based (Ensembl) gene	3	novel transcript	3.13924	8.8106
ENSG00000272078	NA	AL139423.1	lncRNA	Clone-based (Ensembl) gene	1	novel transcript, antisense to CASZ1	3.1423	8.8293
ENSG00000121104	81558	FAM117A	protein_coding	HGNC Symbol	12	family with sequence similarity 117 member A [Source:HGNC Symbol;Acc:HGNC:24179]	3.14407	8.84017
ENSG00000179862	163732	CITED4	protein_coding	HGNC Symbol	1	Cbp/p300 interacting transactivator with Glu/Asp rich carboxy-terminal domain 4 [Source:HGNC Symbol;Acc:HGNC:18696]	3.1448	8.8446
ENSG00000065361	2065	ERBB3	protein_coding	HGNC Symbol	23	erb-b2 receptor tyrosine kinase 3 [Source:HGNC Symbol;Acc:HGNC:3431]	3.14628	8.85372
ENSG00000153132	1047	CLGN	protein_coding	HGNC Symbol	3	calmegin [Source:HGNC Symbol;Acc:HGNC:2060]	3.15051	8.87972
ENSG00000144485	55502	HES6	protein_coding	HGNC Symbol	9	hes family bHLH transcription factor 6 [Source:HGNC Symbol;Acc:HGNC:18254]	3.15479	8.90608
ENSG00000089847	170961	ANKRD24	protein_coding	HGNC Symbol	6	ankyrin repeat domain 24 [Source:HGNC Symbol;Acc:HGNC:29424]	3.15535	8.90954
ENSG00000166257	55800	SCN3B	protein_coding	HGNC Symbol	9	sodium voltage-gated channel beta subunit 3 [Source:HGNC Symbol;Acc:HGNC:20665]	3.15582	8.91241
ENSG00000182118	375061	FAM89A	protein_coding	HGNC Symbol	3	family with sequence similarity 89 member A [Source:HGNC Symbol;Acc:HGNC:25057]	3.15598	8.91341
ENSG00000178445	2731	GLDC	protein_coding	HGNC Symbol	22	glycine decarboxylase [Source:HGNC Symbol;Acc:HGNC:4313]	3.15602	8.91365
ENSG00000106537	27075	TSPAN13	protein_coding	HGNC Symbol	2	tetraspanin 13 [Source:HGNC Symbol;Acc:HGNC:21643]	3.15895	8.93181
ENSG00000205045	100506736	SLFN12L	protein_coding	HGNC Symbol	4	schlafen family member 12 like [Source:HGNC Symbol;Acc:HGNC:33920]	3.16315	8.95784
ENSG00000184985	57537	SORCS2	protein_coding	HGNC Symbol	4	sortilin related VPS10 domain containing receptor 2 [Source:HGNC Symbol;Acc:HGNC:16698]	3.16341	8.95944
ENSG00000135604	8676	STX11	protein_coding	HGNC Symbol	1	syntaxin 11 [Source:HGNC Symbol;Acc:HGNC:11429]	3.16426	8.96473
ENSG00000270722	NA	RNVU1-31	snRNA	HGNC Symbol	1	RNA, variant U1 small nuclear 31 [Source:HGNC Symbol;Acc:HGNC:54448]	3.16975	8.99889
ENSG00000116741	5997	RGS2	protein_coding	HGNC Symbol	4	regulator of G protein signaling 2 [Source:HGNC Symbol;Acc:HGNC:9998]	3.1787	9.05494
ENSG00000177455	930	CD19	protein_coding	HGNC Symbol	5	CD19 molecule [Source:HGNC Symbol;Acc:HGNC:1633]	3.18342	9.08461
ENSG00000126803	3306	HSPA2	protein_coding	HGNC Symbol	3	heat shock protein family A (Hsp70) member 2 [Source:HGNC Symbol;Acc:HGNC:5235]	3.18505	9.09484
ENSG00000278318	7772	ZNF229	protein_coding	HGNC Symbol	5	zinc finger protein 229 [Source:HGNC Symbol;Acc:HGNC:13022]	3.18872	9.11801
ENSG00000171812	1296	COL8A2	protein_coding	HGNC Symbol	3	collagen type VIII alpha 2 chain [Source:HGNC Symbol;Acc:HGNC:2216]	3.18918	9.12092
ENSG00000157551	3772	KCNJ15	protein_coding	HGNC Symbol	22	potassium inwardly rectifying channel subfamily J member 15 [Source:HGNC Symbol;Acc:HGNC:6261]	3.19029	9.12794
ENSG00000128604	3663	IRF5	protein_coding	HGNC Symbol	18	interferon regulatory factor 5 [Source:HGNC Symbol;Acc:HGNC:6120]	3.19413	9.15225
ENSG00000160282	10841	FTCD	protein_coding	HGNC Symbol	12	formimidoyltransferase cyclodeaminase [Source:HGNC Symbol;Acc:HGNC:3974]	3.19849	9.17995
ENSG00000122986	84329	HVCN1	protein_coding	HGNC Symbol	9	hydrogen voltage gated channel 1 [Source:HGNC Symbol;Acc:HGNC:28240]	3.19987	9.18879
ENSG00000175040	9435	CHST2	protein_coding	HGNC Symbol	1	carbohydrate sulfotransferase 2 [Source:HGNC Symbol;Acc:HGNC:1970]	3.20133	9.19805
ENSG00000164638	222962	SLC29A4	protein_coding	HGNC Symbol	6	solute carrier family 29 member 4 [Source:HGNC Symbol;Acc:HGNC:23097]	3.20437	9.2175
ENSG00000149131	710	SERPING1	protein_coding	HGNC Symbol	13	serpin family G member 1 [Source:HGNC Symbol;Acc:HGNC:1228]	3.20535	9.22371
ENSG00000175866	10458	BAIAP2	protein_coding	HGNC Symbol	30	BAR/IMD domain containing adaptor protein 2 [Source:HGNC Symbol;Acc:HGNC:947]	3.21044	9.25632
ENSG00000197077	85379	KIAA1671	protein_coding	HGNC Symbol	6	KIAA1671 [Source:HGNC Symbol;Acc:HGNC:29345]	3.21166	9.26416
ENSG00000185046	56899	ANKS1B	protein_coding	HGNC Symbol	34	ankyrin repeat and sterile alpha motif domain containing 1B [Source:HGNC Symbol;Acc:HGNC:24600]	3.21697	9.29832
ENSG00000129514	3169	FOXA1	protein_coding	HGNC Symbol	5	forkhead box A1 [Source:HGNC Symbol;Acc:HGNC:5021]	3.21878	9.30998
ENSG00000173258	158399	ZNF483	protein_coding	HGNC Symbol	4	zinc finger protein 483 [Source:HGNC Symbol;Acc:HGNC:23384]	3.2224	9.33336
ENSG00000213946	NA	DNAJB1P1	processed_pseudogene	HGNC Symbol	1	DnaJ heat shock protein family (Hsp40) member B1 pseudogene 1 [Source:HGNC Symbol;Acc:HGNC:24988]	3.22803	9.36988
ENSG00000237356	NA	AL365295.1	lncRNA	Clone-based (Ensembl) gene	28	novel transcript	3.22875	9.37455
ENSG00000198959	7052	TGM2	protein_coding	HGNC Symbol	6	transglutaminase 2 [Source:HGNC Symbol;Acc:HGNC:11778]	3.23166	9.39346
ENSG00000167641	94274	PPP1R14A	protein_coding	HGNC Symbol	5	protein phosphatase 1 regulatory inhibitor subunit 14A [Source:HGNC Symbol;Acc:HGNC:14871]	3.23545	9.41816
ENSG00000249751	641700	ECSCR	protein_coding	HGNC Symbol	1	endothelial cell surface expressed chemotaxis and apoptosis regulator [Source:HGNC Symbol;Acc:HGNC:35454]	3.24415	9.47514
ENSG00000176723	283933	ZNF843	protein_coding	HGNC Symbol	3	zinc finger protein 843 [Source:HGNC Symbol;Acc:HGNC:28710]	3.24628	9.48913
ENSG00000100290	638	BIK	protein_coding	HGNC Symbol	1	BCL2 interacting killer [Source:HGNC Symbol;Acc:HGNC:1051]	3.24686	9.49297
ENSG00000183117	64478	CSMD1	protein_coding	HGNC Symbol	18	CUB and Sushi multiple domains 1 [Source:HGNC Symbol;Acc:HGNC:14026]	3.25292	9.5329
ENSG00000124102	5266	PI3	protein_coding	HGNC Symbol	1	peptidase inhibitor 3 [Source:HGNC Symbol;Acc:HGNC:8947]	3.26129	9.58842
ENSG00000113356	10622	POLR3G	protein_coding	HGNC Symbol	8	RNA polymerase III subunit G [Source:HGNC Symbol;Acc:HGNC:30075]	3.26511	9.61385
ENSG00000131737	3885	KRT34	protein_coding	HGNC Symbol	1	keratin 34 [Source:HGNC Symbol;Acc:HGNC:6452]	3.27946	9.70991
ENSG00000131737	100653049	KRT34	protein_coding	HGNC Symbol	1	keratin 34 [Source:HGNC Symbol;Acc:HGNC:6452]	3.27946	9.70991
ENSG00000187479	387763	C11orf96	protein_coding	HGNC Symbol	2	chromosome 11 open reading frame 96 [Source:HGNC Symbol;Acc:HGNC:38675]	3.28473	9.74546
ENSG00000247193	NA	AC104078.1	lncRNA	Clone-based (Ensembl) gene	3	novel transcript, antisense to CENTD1	3.28923	9.77593
ENSG00000008735	23542	MAPK8IP2	protein_coding	HGNC Symbol	2	mitogen-activated protein kinase 8 interacting protein 2 [Source:HGNC Symbol;Acc:HGNC:6883]	3.29028	9.78303
ENSG00000171368	11076	TPPP	protein_coding	HGNC Symbol	1	tubulin polymerization promoting protein [Source:HGNC Symbol;Acc:HGNC:24164]	3.29391	9.80766
ENSG00000204475	259197	NCR3	protein_coding	HGNC Symbol	6	natural cytotoxicity triggering receptor 3 [Source:HGNC Symbol;Acc:HGNC:19077]	3.29657	9.82575
ENSG00000149968	4314	MMP3	protein_coding	HGNC Symbol	3	matrix metallopeptidase 3 [Source:HGNC Symbol;Acc:HGNC:7173]	3.29777	9.83393
ENSG00000165591	158584	FAAH2	protein_coding	HGNC Symbol	3	fatty acid amide hydrolase 2 [Source:HGNC Symbol;Acc:HGNC:26440]	3.30187	9.86192
ENSG00000260010	NA	ZNF720P1	processed_pseudogene	HGNC Symbol	1	zinc finger protein 720 pseudogene 1 [Source:HGNC Symbol;Acc:HGNC:34505]	3.30397	9.87627
ENSG00000142619	51702	PADI3	protein_coding	HGNC Symbol	1	peptidyl arginine deiminase 3 [Source:HGNC Symbol;Acc:HGNC:18337]	3.30654	9.89393
ENSG00000123700	3759	KCNJ2	protein_coding	HGNC Symbol	2	potassium inwardly rectifying channel subfamily J member 2 [Source:HGNC Symbol;Acc:HGNC:6263]	3.31883	9.97855
ENSG00000259803	146429	SLC22A31	protein_coding	HGNC Symbol	6	solute carrier family 22 member 31 [Source:HGNC Symbol;Acc:HGNC:27091]	3.33428	10.086
ENSG00000215788	8718	TNFRSF25	protein_coding	HGNC Symbol	21	TNF receptor superfamily member 25 [Source:HGNC Symbol;Acc:HGNC:11910]	3.34189	10.1393
ENSG00000242902	NA	FLNC-AS1	lncRNA	HGNC Symbol	1	FLNC antisense RNA 1 [Source:HGNC Symbol;Acc:HGNC:53474]	3.34264	10.1446
ENSG00000128011	57622	LRFN1	protein_coding	HGNC Symbol	1	leucine rich repeat and fibronectin type III domain containing 1 [Source:HGNC Symbol;Acc:HGNC:29290]	3.34305	10.1475
ENSG00000186104	120227	CYP2R1	protein_coding	HGNC Symbol	10	cytochrome P450 family 2 subfamily R member 1 [Source:HGNC Symbol;Acc:HGNC:20580]	3.344	10.1541
ENSG00000149451	80332	ADAM33	protein_coding	HGNC Symbol	7	ADAM metallopeptidase domain 33 [Source:HGNC Symbol;Acc:HGNC:15478]	3.35192	10.2101
ENSG00000215246	NA	AC116351.1	lncRNA	Clone-based (Ensembl) gene	1	novel transcript	3.35289	10.2169
ENSG00000233058	NA	LINC00884	lncRNA	HGNC Symbol	10	long intergenic non-protein coding RNA 884 [Source:HGNC Symbol;Acc:HGNC:48570]	3.35328	10.2197
ENSG00000248323	NA	LUCAT1	lncRNA	HGNC Symbol	61	lung cancer associated transcript 1 [Source:HGNC Symbol;Acc:HGNC:48498]	3.35722	10.2476
ENSG00000170962	80310	PDGFD	protein_coding	HGNC Symbol	3	platelet derived growth factor D [Source:HGNC Symbol;Acc:HGNC:30620]	3.35771	10.2511
ENSG00000197380	147906	DACT3	protein_coding	HGNC Symbol	3	dishevelled binding antagonist of beta catenin 3 [Source:HGNC Symbol;Acc:HGNC:30745]	3.35774	10.2513
ENSG00000204103	9935	MAFB	protein_coding	HGNC Symbol	1	MAF bZIP transcription factor B [Source:HGNC Symbol;Acc:HGNC:6408]	3.35827	10.2551
ENSG00000081041	2920	CXCL2	protein_coding	HGNC Symbol	3	C-X-C motif chemokine ligand 2 [Source:HGNC Symbol;Acc:HGNC:4603]	3.36187	10.2808
ENSG00000248905	342184	FMN1	protein_coding	HGNC Symbol	13	formin 1 [Source:HGNC Symbol;Acc:HGNC:3768]	3.36399	10.2958
ENSG00000272512	NA	AL645608.7	lncRNA	Clone-based (Ensembl) gene	1	novel transcript	3.36613	10.3112
ENSG00000147082	85417	CCNB3	protein_coding	HGNC Symbol	8	cyclin B3 [Source:HGNC Symbol;Acc:HGNC:18709]	3.37891	10.4029
ENSG00000163376	84541	KBTBD8	protein_coding	HGNC Symbol	5	kelch repeat and BTB domain containing 8 [Source:HGNC Symbol;Acc:HGNC:30691]	3.38139	10.4207
ENSG00000153982	284161	GDPD1	protein_coding	HGNC Symbol	7	glycerophosphodiester phosphodiesterase domain containing 1 [Source:HGNC Symbol;Acc:HGNC:20883]	3.38415	10.4407
ENSG00000006747	85477	SCIN	protein_coding	HGNC Symbol	10	scinderin [Source:HGNC Symbol;Acc:HGNC:21695]	3.38965	10.4806
ENSG00000173083	10855	HPSE	protein_coding	HGNC Symbol	7	heparanase [Source:HGNC Symbol;Acc:HGNC:5164]	3.39218	10.499
ENSG00000150995	3708	ITPR1	protein_coding	HGNC Symbol	56	inositol 1,4,5-trisphosphate receptor type 1 [Source:HGNC Symbol;Acc:HGNC:6180]	3.39483	10.5183
ENSG00000115255	92840	REEP6	protein_coding	HGNC Symbol	4	receptor accessory protein 6 [Source:HGNC Symbol;Acc:HGNC:30078]	3.39658	10.5311
ENSG00000142621	114827	FHAD1	protein_coding	HGNC Symbol	22	forkhead associated phosphopeptide binding domain 1 [Source:HGNC Symbol;Acc:HGNC:29408]	3.40933	10.6246
ENSG00000146013	2676	GFRA3	protein_coding	HGNC Symbol	2	GDNF family receptor alpha 3 [Source:HGNC Symbol;Acc:HGNC:4245]	3.41232	10.6466
ENSG00000060558	2769	GNA15	protein_coding	HGNC Symbol	3	G protein subunit alpha 15 [Source:HGNC Symbol;Acc:HGNC:4383]	3.4125	10.6479
ENSG00000215045	392862	GRID2IP	protein_coding	HGNC Symbol	3	Grid2 interacting protein [Source:HGNC Symbol;Acc:HGNC:18464]	3.4178	10.6871
ENSG00000006210	6376	CX3CL1	protein_coding	HGNC Symbol	4	C-X3-C motif chemokine ligand 1 [Source:HGNC Symbol;Acc:HGNC:10647]	3.41814	10.6896
ENSG00000186994	256949	KANK3	protein_coding	HGNC Symbol	5	KN motif and ankyrin repeat domains 3 [Source:HGNC Symbol;Acc:HGNC:24796]	3.41827	10.6906
ENSG00000198520	339541	ARMH1	protein_coding	HGNC Symbol	21	armadillo like helical domain containing 1 [Source:HGNC Symbol;Acc:HGNC:34345]	3.4264	10.751
ENSG00000145088	55840	EAF2	protein_coding	HGNC Symbol	5	ELL associated factor 2 [Source:HGNC Symbol;Acc:HGNC:23115]	3.43086	10.7843
ENSG00000102755	2321	FLT1	protein_coding	HGNC Symbol	9	fms related receptor tyrosine kinase 1 [Source:HGNC Symbol;Acc:HGNC:3763]	3.43255	10.797
ENSG00000050730	79931	TNIP3	protein_coding	HGNC Symbol	7	TNFAIP3 interacting protein 3 [Source:HGNC Symbol;Acc:HGNC:19315]	3.44508	10.8911
ENSG00000108370	8787	RGS9	protein_coding	HGNC Symbol	12	regulator of G protein signaling 9 [Source:HGNC Symbol;Acc:HGNC:10004]	3.44734	10.9082
ENSG00000134317	29841	GRHL1	protein_coding	HGNC Symbol	8	grainyhead like transcription factor 1 [Source:HGNC Symbol;Acc:HGNC:17923]	3.45198	10.9433
ENSG00000104879	1158	CKM	protein_coding	HGNC Symbol	1	creatine kinase, M-type [Source:HGNC Symbol;Acc:HGNC:1994]	3.45541	10.9694
ENSG00000119508	8013	NR4A3	protein_coding	HGNC Symbol	4	nuclear receptor subfamily 4 group A member 3 [Source:HGNC Symbol;Acc:HGNC:7982]	3.46827	11.0676
ENSG00000112149	9308	CD83	protein_coding	HGNC Symbol	2	CD83 molecule [Source:HGNC Symbol;Acc:HGNC:1703]	3.47036	11.0837
ENSG00000204789	NA	ZNF204P	processed_pseudogene	HGNC Symbol	1	zinc finger protein 204, pseudogene [Source:HGNC Symbol;Acc:HGNC:12995]	3.4723	11.0986
ENSG00000152527	130271	PLEKHH2	protein_coding	HGNC Symbol	8	pleckstrin homology, MyTH4 and FERM domain containing H2 [Source:HGNC Symbol;Acc:HGNC:30506]	3.48278	11.1795
ENSG00000131738	3884	KRT33B	protein_coding	HGNC Symbol	1	keratin 33B [Source:HGNC Symbol;Acc:HGNC:6451]	3.48412	11.1898
ENSG00000131979	2643	GCH1	protein_coding	HGNC Symbol	7	GTP cyclohydrolase 1 [Source:HGNC Symbol;Acc:HGNC:4193]	3.48443	11.1922
ENSG00000053524	23101	MCF2L2	protein_coding	HGNC Symbol	14	MCF.2 cell line derived transforming sequence-like 2 [Source:HGNC Symbol;Acc:HGNC:30319]	3.49299	11.2588
ENSG00000158220	83850	ESYT3	protein_coding	HGNC Symbol	7	extended synaptotagmin 3 [Source:HGNC Symbol;Acc:HGNC:24295]	3.4949	11.2738
ENSG00000147231	55086	RADX	protein_coding	HGNC Symbol	6	RPA1 related single stranded DNA binding protein, X-linked [Source:HGNC Symbol;Acc:HGNC:25486]	3.49542	11.2778
ENSG00000100678	6547	SLC8A3	protein_coding	HGNC Symbol	10	solute carrier family 8 member A3 [Source:HGNC Symbol;Acc:HGNC:11070]	3.49866	11.3032
ENSG00000145819	23092	ARHGAP26	protein_coding	HGNC Symbol	23	Rho GTPase activating protein 26 [Source:HGNC Symbol;Acc:HGNC:17073]	3.50118	11.3229
ENSG00000156510	80201	HKDC1	protein_coding	HGNC Symbol	3	hexokinase domain containing 1 [Source:HGNC Symbol;Acc:HGNC:23302]	3.50194	11.3289
ENSG00000254995	NA	STX16-NPEPL1	protein_coding	HGNC Symbol	2	STX16-NPEPL1 readthrough (NMD candidate) [Source:HGNC Symbol;Acc:HGNC:41993]	3.50672	11.3666
ENSG00000115705	7173	TPO	protein_coding	HGNC Symbol	16	thyroid peroxidase [Source:HGNC Symbol;Acc:HGNC:12015]	3.5133	11.4185
ENSG00000248810	NA	LINC02432	lncRNA	HGNC Symbol	8	long intergenic non-protein coding RNA 2432 [Source:HGNC Symbol;Acc:HGNC:53363]	3.52013	11.4727
ENSG00000125144	4495	MT1G	protein_coding	HGNC Symbol	4	metallothionein 1G [Source:HGNC Symbol;Acc:HGNC:7399]	3.52515	11.5126
ENSG00000155846	133522	PPARGC1B	protein_coding	HGNC Symbol	7	PPARG coactivator 1 beta [Source:HGNC Symbol;Acc:HGNC:30022]	3.52821	11.5371
ENSG00000117013	9132	KCNQ4	protein_coding	HGNC Symbol	4	potassium voltage-gated channel subfamily Q member 4 [Source:HGNC Symbol;Acc:HGNC:6298]	3.52865	11.5406
ENSG00000105613	22983	MAST1	protein_coding	HGNC Symbol	9	microtubule associated serine/threonine kinase 1 [Source:HGNC Symbol;Acc:HGNC:19034]	3.53046	11.5551
ENSG00000124493	2914	GRM4	protein_coding	HGNC Symbol	14	glutamate metabotropic receptor 4 [Source:HGNC Symbol;Acc:HGNC:4596]	3.53381	11.582
ENSG00000227825	NA	SLC9A7P1	transcribed_processed_pseudogene	HGNC Symbol	2	solute carrier family 9 member 7 pseudogene 1 [Source:HGNC Symbol;Acc:HGNC:32679]	3.5359	11.5988
ENSG00000119514	79695	GALNT12	protein_coding	HGNC Symbol	4	polypeptide N-acetylgalactosaminyltransferase 12 [Source:HGNC Symbol;Acc:HGNC:19877]	3.53732	11.6102
ENSG00000170500	164832	LONRF2	protein_coding	HGNC Symbol	2	LON peptidase N-terminal domain and ring finger 2 [Source:HGNC Symbol;Acc:HGNC:24788]	3.55337	11.7401
ENSG00000177464	2828	GPR4	protein_coding	HGNC Symbol	2	G protein-coupled receptor 4 [Source:HGNC Symbol;Acc:HGNC:4497]	3.55949	11.79
ENSG00000027644	3645	INSRR	protein_coding	HGNC Symbol	1	insulin receptor related receptor [Source:HGNC Symbol;Acc:HGNC:6093]	3.56093	11.8017
ENSG00000134602	51765	STK26	protein_coding	HGNC Symbol	5	serine/threonine kinase 26 [Source:HGNC Symbol;Acc:HGNC:18174]	3.56124	11.8043
ENSG00000124772	57699	CPNE5	protein_coding	HGNC Symbol	8	copine 5 [Source:HGNC Symbol;Acc:HGNC:2318]	3.56458	11.8317
ENSG00000180815	389840	MAP3K15	protein_coding	HGNC Symbol	4	mitogen-activated protein kinase kinase kinase 15 [Source:HGNC Symbol;Acc:HGNC:31689]	3.56461	11.8319
ENSG00000205426	3887	KRT81	protein_coding	HGNC Symbol	2	keratin 81 [Source:HGNC Symbol;Acc:HGNC:6458]	3.56997	11.8759
ENSG00000175793	2810	SFN	protein_coding	HGNC Symbol	1	stratifin [Source:HGNC Symbol;Acc:HGNC:10773]	3.57403	11.9094
ENSG00000120915	2053	EPHX2	protein_coding	HGNC Symbol	12	epoxide hydrolase 2 [Source:HGNC Symbol;Acc:HGNC:3402]	3.57622	11.9275
ENSG00000172350	64137	ABCG4	protein_coding	HGNC Symbol	6	ATP binding cassette subfamily G member 4 [Source:HGNC Symbol;Acc:HGNC:13884]	3.57714	11.9351
ENSG00000259370	NA	AC103740.1	lncRNA	Clone-based (Ensembl) gene	4	novel transcript, antisense to TLN2	3.58405	11.9924
ENSG00000136367	85446	ZFHX2	protein_coding	HGNC Symbol	5	zinc finger homeobox 2 [Source:HGNC Symbol;Acc:HGNC:20152]	3.58503	12.0006
ENSG00000166922	6447	SCG5	protein_coding	HGNC Symbol	9	secretogranin V [Source:HGNC Symbol;Acc:HGNC:10816]	3.58679	12.0152
ENSG00000228363	NA	AC015971.1	lncRNA	Clone-based (Ensembl) gene	4	novel transcript	3.59486	12.0826
ENSG00000120738	1958	EGR1	protein_coding	HGNC Symbol	1	early growth response 1 [Source:HGNC Symbol;Acc:HGNC:3238]	3.59646	12.096
ENSG00000176092	55057	CRYBG2	protein_coding	HGNC Symbol	11	crystallin beta-gamma domain containing 2 [Source:HGNC Symbol;Acc:HGNC:17295]	3.60626	12.1785
ENSG00000100314	164633	CABP7	protein_coding	HGNC Symbol	1	calcium binding protein 7 [Source:HGNC Symbol;Acc:HGNC:20834]	3.62285	12.3193
ENSG00000189120	80320	SP6	protein_coding	HGNC Symbol	2	Sp6 transcription factor [Source:HGNC Symbol;Acc:HGNC:14530]	3.62487	12.3366
ENSG00000159871	284348	LYPD5	protein_coding	HGNC Symbol	9	LY6/PLAUR domain containing 5 [Source:HGNC Symbol;Acc:HGNC:26397]	3.62513	12.3388
ENSG00000128268	4248	MGAT3	protein_coding	HGNC Symbol	3	beta-1,4-mannosyl-glycoprotein 4-beta-N-acetylglucosaminyltransferase [Source:HGNC Symbol;Acc:HGNC:7046]	3.62649	12.3504
ENSG00000197959	26052	DNM3	protein_coding	HGNC Symbol	8	dynamin 3 [Source:HGNC Symbol;Acc:HGNC:29125]	3.62742	12.3584
ENSG00000106003	3955	LFNG	protein_coding	HGNC Symbol	7	LFNG O-fucosylpeptide 3-beta-N-acetylglucosaminyltransferase [Source:HGNC Symbol;Acc:HGNC:6560]	3.64292	12.4919
ENSG00000106689	9355	LHX2	protein_coding	HGNC Symbol	4	LIM homeobox 2 [Source:HGNC Symbol;Acc:HGNC:6594]	3.6438	12.4995
ENSG00000171310	50515	CHST11	protein_coding	HGNC Symbol	6	carbohydrate sulfotransferase 11 [Source:HGNC Symbol;Acc:HGNC:17422]	3.64483	12.5084
ENSG00000135299	22881	ANKRD6	protein_coding	HGNC Symbol	22	ankyrin repeat domain 6 [Source:HGNC Symbol;Acc:HGNC:17280]	3.64607	12.5192
ENSG00000138166	1847	DUSP5	protein_coding	HGNC Symbol	2	dual specificity phosphatase 5 [Source:HGNC Symbol;Acc:HGNC:3071]	3.65062	12.5588
ENSG00000076258	2329	FMO4	protein_coding	HGNC Symbol	5	flavin containing dimethylaniline monoxygenase 4 [Source:HGNC Symbol;Acc:HGNC:3772]	3.65269	12.5768
ENSG00000257219	NA	LNCOG	lncRNA	HGNC Symbol	2	lncRNA osteogenesis associated [Source:HGNC Symbol;Acc:HGNC:53336]	3.65586	12.6044
ENSG00000162174	80150	ASRGL1	protein_coding	HGNC Symbol	11	asparaginase and isoaspartyl peptidase 1 [Source:HGNC Symbol;Acc:HGNC:16448]	3.65951	12.6363
ENSG00000203711	NA	C6orf99	lncRNA	HGNC Symbol	15	chromosome 6 open reading frame 99 [Source:HGNC Symbol;Acc:HGNC:21179]	3.66266	12.664
ENSG00000188859	149297	FAM78B	protein_coding	HGNC Symbol	5	family with sequence similarity 78 member B [Source:HGNC Symbol;Acc:HGNC:13495]	3.66528	12.687
ENSG00000250305	57604	TRMT9B	protein_coding	HGNC Symbol	9	tRNA methyltransferase 9B (putative) [Source:HGNC Symbol;Acc:HGNC:26725]	3.66652	12.6979
ENSG00000249406	NA	AC015909.1	lncRNA	Clone-based (Ensembl) gene	11	novel transcript	3.66692	12.7014
ENSG00000169918	161725	OTUD7A	protein_coding	HGNC Symbol	4	OTU deubiquitinase 7A [Source:HGNC Symbol;Acc:HGNC:20718]	3.66795	12.7105
ENSG00000185436	163702	IFNLR1	protein_coding	HGNC Symbol	5	interferon lambda receptor 1 [Source:HGNC Symbol;Acc:HGNC:18584]	3.67561	12.7781
ENSG00000105605	59284	CACNG7	protein_coding	HGNC Symbol	4	calcium voltage-gated channel auxiliary subunit gamma 7 [Source:HGNC Symbol;Acc:HGNC:13626]	3.67859	12.8046
ENSG00000092068	23428	SLC7A8	protein_coding	HGNC Symbol	14	solute carrier family 7 member 8 [Source:HGNC Symbol;Acc:HGNC:11066]	3.6831	12.8447
ENSG00000073282	8626	TP63	protein_coding	HGNC Symbol	14	tumor protein p63 [Source:HGNC Symbol;Acc:HGNC:15979]	3.68921	12.8992
ENSG00000021300	58473	PLEKHB1	protein_coding	HGNC Symbol	22	pleckstrin homology domain containing B1 [Source:HGNC Symbol;Acc:HGNC:19079]	3.69396	12.9417
ENSG00000184792	23762	OSBP2	protein_coding	HGNC Symbol	19	oxysterol binding protein 2 [Source:HGNC Symbol;Acc:HGNC:8504]	3.69413	12.9433
ENSG00000076826	57662	CAMSAP3	protein_coding	HGNC Symbol	4	calmodulin regulated spectrin associated protein family member 3 [Source:HGNC Symbol;Acc:HGNC:29307]	3.70124	13.0073
ENSG00000132938	23281	MTUS2	protein_coding	HGNC Symbol	6	microtubule associated scaffold protein 2 [Source:HGNC Symbol;Acc:HGNC:20595]	3.70137	13.0084
ENSG00000155629	118788	PIK3AP1	protein_coding	HGNC Symbol	6	phosphoinositide-3-kinase adaptor protein 1 [Source:HGNC Symbol;Acc:HGNC:30034]	3.70854	13.0732
ENSG00000260231	NA	KDM7A-DT	lncRNA	HGNC Symbol	1	KDM7A divergent transcript [Source:HGNC Symbol;Acc:HGNC:48959]	3.70927	13.0798
ENSG00000236453	NA	AC003092.1	lncRNA	Clone-based (Ensembl) gene	2	novel transcript	3.71063	13.0921
ENSG00000132122	54558	SPATA6	protein_coding	HGNC Symbol	11	spermatogenesis associated 6 [Source:HGNC Symbol;Acc:HGNC:18309]	3.71169	13.1017
ENSG00000104381	54332	GDAP1	protein_coding	HGNC Symbol	8	ganglioside induced differentiation associated protein 1 [Source:HGNC Symbol;Acc:HGNC:15968]	3.71298	13.1135
ENSG00000242265	23089	PEG10	protein_coding	HGNC Symbol	9	paternally expressed 10 [Source:HGNC Symbol;Acc:HGNC:14005]	3.71571	13.1383
ENSG00000172794	326624	RAB37	protein_coding	HGNC Symbol	16	RAB37, member RAS oncogene family [Source:HGNC Symbol;Acc:HGNC:30268]	3.72138	13.1901
ENSG00000235072	NA	ARNILA	lncRNA	HGNC Symbol	2	androgen receptor negatively regulated lncRNA [Source:HGNC Symbol;Acc:HGNC:54484]	3.73043	13.273
ENSG00000162817	79762	C1orf115	protein_coding	HGNC Symbol	1	chromosome 1 open reading frame 115 [Source:HGNC Symbol;Acc:HGNC:25873]	3.73195	13.2871
ENSG00000240476	NA	LINC00973	lncRNA	HGNC Symbol	1	long intergenic non-protein coding RNA 973 [Source:HGNC Symbol;Acc:HGNC:48868]	3.73331	13.2996
ENSG00000073350	3993	LLGL2	protein_coding	HGNC Symbol	22	LLGL scribble cell polarity complex component 2 [Source:HGNC Symbol;Acc:HGNC:6629]	3.74363	13.395
ENSG00000277586	4747	NEFL	protein_coding	HGNC Symbol	4	neurofilament light [Source:HGNC Symbol;Acc:HGNC:7739]	3.74388	13.3974
ENSG00000163975	4241	MELTF	protein_coding	HGNC Symbol	7	melanotransferrin [Source:HGNC Symbol;Acc:HGNC:7037]	3.74542	13.4117
ENSG00000162490	374946	DRAXIN	protein_coding	HGNC Symbol	1	dorsal inhibitory axon guidance protein [Source:HGNC Symbol;Acc:HGNC:25054]	3.75022	13.4564
ENSG00000242017	NA	ALG1L15P	processed_pseudogene	HGNC Symbol	1	ALG1 like 15, pseudogene [Source:HGNC Symbol;Acc:HGNC:44384]	3.7549	13.5001
ENSG00000182162	286530	P2RY8	protein_coding	HGNC Symbol	2	P2Y receptor family member 8 [Source:HGNC Symbol;Acc:HGNC:15524]	3.75621	13.5124
ENSG00000112559	4188	MDFI	protein_coding	HGNC Symbol	9	MyoD family inhibitor [Source:HGNC Symbol;Acc:HGNC:6967]	3.75802	13.5293
ENSG00000140403	55466	DNAJA4	protein_coding	HGNC Symbol	12	DnaJ heat shock protein family (Hsp40) member A4 [Source:HGNC Symbol;Acc:HGNC:14885]	3.76016	13.5495
ENSG00000138449	30061	SLC40A1	protein_coding	HGNC Symbol	7	solute carrier family 40 member 1 [Source:HGNC Symbol;Acc:HGNC:10909]	3.76373	13.583
ENSG00000176049	9832	JAKMIP2	protein_coding	HGNC Symbol	6	janus kinase and microtubule interacting protein 2 [Source:HGNC Symbol;Acc:HGNC:29067]	3.7697	13.6393
ENSG00000132688	10763	NES	protein_coding	HGNC Symbol	1	nestin [Source:HGNC Symbol;Acc:HGNC:7756]	3.78255	13.7614
ENSG00000145911	23138	N4BP3	protein_coding	HGNC Symbol	1	NEDD4 binding protein 3 [Source:HGNC Symbol;Acc:HGNC:29852]	3.78262	13.762
ENSG00000115271	25801	GCA	protein_coding	HGNC Symbol	10	grancalcin [Source:HGNC Symbol;Acc:HGNC:15990]	3.78288	13.7645
ENSG00000139219	1280	COL2A1	protein_coding	HGNC Symbol	9	collagen type II alpha 1 chain [Source:HGNC Symbol;Acc:HGNC:2200]	3.79132	13.8453
ENSG00000071073	11320	MGAT4A	protein_coding	HGNC Symbol	9	alpha-1,3-mannosyl-glycoprotein 4-beta-N-acetylglucosaminyltransferase A [Source:HGNC Symbol;Acc:HGNC:7047]	3.79844	13.9137
ENSG00000275004	140883	ZNF280B	protein_coding	HGNC Symbol	3	zinc finger protein 280B [Source:HGNC Symbol;Acc:HGNC:23022]	3.79863	13.9156
ENSG00000158813	1896	EDA	protein_coding	HGNC Symbol	13	ectodysplasin A [Source:HGNC Symbol;Acc:HGNC:3157]	3.80284	13.9562
ENSG00000064042	22998	LIMCH1	protein_coding	HGNC Symbol	22	LIM and calponin homology domains 1 [Source:HGNC Symbol;Acc:HGNC:29191]	3.80365	13.9641
ENSG00000173110	3310	HSPA6	protein_coding	HGNC Symbol	1	heat shock protein family A (Hsp70) member 6 [Source:HGNC Symbol;Acc:HGNC:5239]	3.80619	13.9887
ENSG00000158458	9542	NRG2	protein_coding	HGNC Symbol	9	neuregulin 2 [Source:HGNC Symbol;Acc:HGNC:7998]	3.80787	14.005
ENSG00000165899	283310	OTOGL	protein_coding	HGNC Symbol	9	otogelin like [Source:HGNC Symbol;Acc:HGNC:26901]	3.80809	14.0072
ENSG00000176658	4642	MYO1D	protein_coding	HGNC Symbol	16	myosin ID [Source:HGNC Symbol;Acc:HGNC:7598]	3.81153	14.0406
ENSG00000022267	2273	FHL1	protein_coding	HGNC Symbol	36	four and a half LIM domains 1 [Source:HGNC Symbol;Acc:HGNC:3702]	3.81305	14.0554
ENSG00000163734	2921	CXCL3	protein_coding	HGNC Symbol	4	C-X-C motif chemokine ligand 3 [Source:HGNC Symbol;Acc:HGNC:4604]	3.81405	14.0651
ENSG00000019102	23584	VSIG2	protein_coding	HGNC Symbol	2	V-set and immunoglobulin domain containing 2 [Source:HGNC Symbol;Acc:HGNC:17149]	3.81739	14.0977
ENSG00000101605	8736	MYOM1	protein_coding	HGNC Symbol	7	myomesin 1 [Source:HGNC Symbol;Acc:HGNC:7613]	3.82127	14.1357
ENSG00000183317	284656	EPHA10	protein_coding	HGNC Symbol	11	EPH receptor A10 [Source:HGNC Symbol;Acc:HGNC:19987]	3.83367	14.2578
ENSG00000188763	8326	FZD9	protein_coding	HGNC Symbol	1	frizzled class receptor 9 [Source:HGNC Symbol;Acc:HGNC:4047]	3.83707	14.2914
ENSG00000157404	3815	KIT	protein_coding	HGNC Symbol	4	KIT proto-oncogene, receptor tyrosine kinase [Source:HGNC Symbol;Acc:HGNC:6342]	3.84926	14.4126
ENSG00000027869	9047	SH2D2A	protein_coding	HGNC Symbol	6	SH2 domain containing 2A [Source:HGNC Symbol;Acc:HGNC:10821]	3.85041	14.4241
ENSG00000128917	54567	DLL4	protein_coding	HGNC Symbol	3	delta like canonical Notch ligand 4 [Source:HGNC Symbol;Acc:HGNC:2910]	3.85521	14.4722
ENSG00000130222	10912	GADD45G	protein_coding	HGNC Symbol	3	growth arrest and DNA damage inducible gamma [Source:HGNC Symbol;Acc:HGNC:4097]	3.8563	14.4831
ENSG00000122824	170685	NUDT10	protein_coding	HGNC Symbol	2	nudix hydrolase 10 [Source:HGNC Symbol;Acc:HGNC:17621]	3.86392	14.5598
ENSG00000172543	1521	CTSW	protein_coding	HGNC Symbol	4	cathepsin W [Source:HGNC Symbol;Acc:HGNC:2546]	3.86745	14.5954
ENSG00000074181	4854	NOTCH3	protein_coding	HGNC Symbol	6	notch receptor 3 [Source:HGNC Symbol;Acc:HGNC:7883]	3.8878	14.8028
ENSG00000055118	3757	KCNH2	protein_coding	HGNC Symbol	6	potassium voltage-gated channel subfamily H member 2 [Source:HGNC Symbol;Acc:HGNC:6251]	3.88843	14.8093
ENSG00000113211	56130	PCDHB6	protein_coding	HGNC Symbol	2	protocadherin beta 6 [Source:HGNC Symbol;Acc:HGNC:8691]	3.89069	14.8325
ENSG00000228431	NA	ARL5AP3	processed_pseudogene	HGNC Symbol	1	ADP ribosylation factor like GTPase 5A pseudogene 3 [Source:HGNC Symbol;Acc:HGNC:43935]	3.89602	14.8874
ENSG00000198794	192683	SCAMP5	protein_coding	HGNC Symbol	18	secretory carrier membrane protein 5 [Source:HGNC Symbol;Acc:HGNC:30386]	3.90071	14.9359
ENSG00000099204	3983	ABLIM1	protein_coding	HGNC Symbol	17	actin binding LIM protein 1 [Source:HGNC Symbol;Acc:HGNC:78]	3.90204	14.9497
ENSG00000138378	6775	STAT4	protein_coding	HGNC Symbol	11	signal transducer and activator of transcription 4 [Source:HGNC Symbol;Acc:HGNC:11365]	3.90614	14.9922
ENSG00000251381	NA	LINC00958	lncRNA	HGNC Symbol	16	long intergenic non-protein coding RNA 958 [Source:HGNC Symbol;Acc:HGNC:48671]	3.91861	15.1223
ENSG00000105289	27134	TJP3	protein_coding	HGNC Symbol	9	tight junction protein 3 [Source:HGNC Symbol;Acc:HGNC:11829]	3.92281	15.1664
ENSG00000223756	NA	TSSC2	transcribed_unprocessed_pseudogene	HGNC Symbol	6	tumor suppressing subtransferable candidate 2 pseudogene [Source:HGNC Symbol;Acc:HGNC:12384]	3.92425	15.1816
ENSG00000184574	57121	LPAR5	protein_coding	HGNC Symbol	3	lysophosphatidic acid receptor 5 [Source:HGNC Symbol;Acc:HGNC:13307]	3.92797	15.2208
ENSG00000113070	1839	HBEGF	protein_coding	HGNC Symbol	3	heparin binding EGF like growth factor [Source:HGNC Symbol;Acc:HGNC:3059]	3.94415	15.3924
ENSG00000175984	163259	DENND2C	protein_coding	HGNC Symbol	6	DENN domain containing 2C [Source:HGNC Symbol;Acc:HGNC:24748]	3.94616	15.4138
ENSG00000136895	84253	GARNL3	protein_coding	HGNC Symbol	22	GTPase activating Rap/RanGAP domain like 3 [Source:HGNC Symbol;Acc:HGNC:25425]	3.9483	15.4368
ENSG00000135446	1019	CDK4	protein_coding	HGNC Symbol	15	cyclin dependent kinase 4 [Source:HGNC Symbol;Acc:HGNC:1773]	3.95277	15.4847
ENSG00000198028	147741	ZNF560	protein_coding	HGNC Symbol	2	zinc finger protein 560 [Source:HGNC Symbol;Acc:HGNC:26484]	3.95384	15.4961
ENSG00000108551	51655	RASD1	protein_coding	HGNC Symbol	2	ras related dexamethasone induced 1 [Source:HGNC Symbol;Acc:HGNC:15828]	3.95971	15.5594
ENSG00000146216	84630	TTBK1	protein_coding	HGNC Symbol	2	tau tubulin kinase 1 [Source:HGNC Symbol;Acc:HGNC:19140]	3.95973	15.5596
ENSG00000108852	4355	MPP2	protein_coding	HGNC Symbol	21	membrane palmitoylated protein 2 [Source:HGNC Symbol;Acc:HGNC:7220]	3.96089	15.5721
ENSG00000102981	50855	PARD6A	protein_coding	HGNC Symbol	4	par-6 family cell polarity regulator alpha [Source:HGNC Symbol;Acc:HGNC:15943]	3.96562	15.6233
ENSG00000108813	1748	DLX4	protein_coding	HGNC Symbol	6	distal-less homeobox 4 [Source:HGNC Symbol;Acc:HGNC:2917]	3.96574	15.6245
ENSG00000117266	5129	CDK18	protein_coding	HGNC Symbol	23	cyclin dependent kinase 18 [Source:HGNC Symbol;Acc:HGNC:8751]	3.96717	15.64
ENSG00000152779	387700	SLC16A12	protein_coding	HGNC Symbol	2	solute carrier family 16 member 12 [Source:HGNC Symbol;Acc:HGNC:23094]	3.97011	15.6719
ENSG00000221946	53822	FXYD7	protein_coding	HGNC Symbol	4	FXYD domain containing ion transport regulator 7 [Source:HGNC Symbol;Acc:HGNC:4034]	3.97174	15.6897
ENSG00000251994	NA	RNU2-27P	snRNA	HGNC Symbol	1	RNA, U2 small nuclear 27, pseudogene [Source:HGNC Symbol;Acc:HGNC:48520]	3.97194	15.6918
ENSG00000119630	5228	PGF	protein_coding	HGNC Symbol	8	placental growth factor [Source:HGNC Symbol;Acc:HGNC:8893]	3.98487	15.833
ENSG00000118526	6943	TCF21	protein_coding	HGNC Symbol	2	transcription factor 21 [Source:HGNC Symbol;Acc:HGNC:11632]	3.98827	15.8704
ENSG00000158008	2134	EXTL1	protein_coding	HGNC Symbol	4	exostosin like glycosyltransferase 1 [Source:HGNC Symbol;Acc:HGNC:3515]	3.99175	15.9088
ENSG00000237693	345611	IRGM	protein_coding	HGNC Symbol	3	immunity related GTPase M [Source:HGNC Symbol;Acc:HGNC:29597]	3.99198	15.9113
ENSG00000188322	388228	SBK1	protein_coding	HGNC Symbol	2	SH3 domain binding kinase 1 [Source:HGNC Symbol;Acc:HGNC:17699]	3.99666	15.963
ENSG00000151136	121551	BTBD11	protein_coding	HGNC Symbol	7	BTB domain containing 11 [Source:HGNC Symbol;Acc:HGNC:23844]	4.00492	16.0547
ENSG00000267632	NA	AC067852.3	lncRNA	Clone-based (Ensembl) gene	1	novel transcript	4.01647	16.1838
ENSG00000100600	5641	LGMN	protein_coding	HGNC Symbol	19	legumain [Source:HGNC Symbol;Acc:HGNC:9472]	4.01812	16.2022
ENSG00000070182	6710	SPTB	protein_coding	HGNC Symbol	7	spectrin beta, erythrocytic [Source:HGNC Symbol;Acc:HGNC:11274]	4.02214	16.2475
ENSG00000104722	4741	NEFM	protein_coding	HGNC Symbol	6	neurofilament medium [Source:HGNC Symbol;Acc:HGNC:7734]	4.0284	16.3181
ENSG00000126583	5582	PRKCG	protein_coding	HGNC Symbol	4	protein kinase C gamma [Source:HGNC Symbol;Acc:HGNC:9402]	4.03301	16.3704
ENSG00000035664	23604	DAPK2	protein_coding	HGNC Symbol	13	death associated protein kinase 2 [Source:HGNC Symbol;Acc:HGNC:2675]	4.03499	16.3928
ENSG00000138606	90525	SHF	protein_coding	HGNC Symbol	11	Src homology 2 domain containing F [Source:HGNC Symbol;Acc:HGNC:25116]	4.04183	16.4707
ENSG00000160588	196264	MPZL3	protein_coding	HGNC Symbol	4	myelin protein zero like 3 [Source:HGNC Symbol;Acc:HGNC:27279]	4.04561	16.5139
ENSG00000161249	93099	DMKN	protein_coding	HGNC Symbol	68	dermokine [Source:HGNC Symbol;Acc:HGNC:25063]	4.04633	16.5222
ENSG00000189431	644943	RASSF10	protein_coding	HGNC Symbol	1	Ras association domain family member 10 [Source:HGNC Symbol;Acc:HGNC:33984]	4.04903	16.5531
ENSG00000122735	27019	DNAI1	protein_coding	HGNC Symbol	9	dynein axonemal intermediate chain 1 [Source:HGNC Symbol;Acc:HGNC:2954]	4.06239	16.7071
ENSG00000197766	1675	CFD	protein_coding	HGNC Symbol	2	complement factor D [Source:HGNC Symbol;Acc:HGNC:2771]	4.06883	16.7819
ENSG00000181085	225689	MAPK15	protein_coding	HGNC Symbol	8	mitogen-activated protein kinase 15 [Source:HGNC Symbol;Acc:HGNC:24667]	4.07019	16.7977
ENSG00000268089	55879	GABRQ	protein_coding	HGNC Symbol	1	gamma-aminobutyric acid type A receptor subunit theta [Source:HGNC Symbol;Acc:HGNC:14454]	4.07074	16.8041
ENSG00000102879	11151	CORO1A	protein_coding	HGNC Symbol	17	coronin 1A [Source:HGNC Symbol;Acc:HGNC:2252]	4.07325	16.8333
ENSG00000169515	83987	CCDC8	protein_coding	HGNC Symbol	1	coiled-coil domain containing 8 [Source:HGNC Symbol;Acc:HGNC:25367]	4.07606	16.8662
ENSG00000214269	NA	LGMNP1	processed_pseudogene	HGNC Symbol	1	legumain pseudogene 1 [Source:HGNC Symbol;Acc:HGNC:23079]	4.07615	16.8672
ENSG00000148798	9118	INA	protein_coding	HGNC Symbol	1	internexin neuronal intermediate filament protein alpha [Source:HGNC Symbol;Acc:HGNC:6057]	4.07818	16.891
ENSG00000164283	11082	ESM1	protein_coding	HGNC Symbol	4	endothelial cell specific molecule 1 [Source:HGNC Symbol;Acc:HGNC:3466]	4.0806	16.9193
ENSG00000132932	51761	ATP8A2	protein_coding	HGNC Symbol	5	ATPase phospholipid transporting 8A2 [Source:HGNC Symbol;Acc:HGNC:13533]	4.08323	16.9502
ENSG00000149294	4684	NCAM1	protein_coding	HGNC Symbol	30	neural cell adhesion molecule 1 [Source:HGNC Symbol;Acc:HGNC:7656]	4.08557	16.9777
ENSG00000229953	NA	AL590666.2	lncRNA	Clone-based (Ensembl) gene	1	novel transcript	4.10025	17.1514
ENSG00000272405	NA	AL365181.3	lncRNA	Clone-based (Ensembl) gene	1	novel transcript, antisense to BCAN	4.10414	17.1976
ENSG00000105641	6528	SLC5A5	protein_coding	HGNC Symbol	2	solute carrier family 5 member 5 [Source:HGNC Symbol;Acc:HGNC:11040]	4.11219	17.2939
ENSG00000175084	1674	DES	protein_coding	HGNC Symbol	4	desmin [Source:HGNC Symbol;Acc:HGNC:2770]	4.12434	17.4402
ENSG00000169429	3576	CXCL8	protein_coding	HGNC Symbol	3	C-X-C motif chemokine ligand 8 [Source:HGNC Symbol;Acc:HGNC:6025]	4.12842	17.4895
ENSG00000187686	NA	KRT18P59	transcribed_processed_pseudogene	HGNC Symbol	2	keratin 18 pseudogene 59 [Source:HGNC Symbol;Acc:HGNC:48886]	4.13418	17.5595
ENSG00000156453	5097	PCDH1	protein_coding	HGNC Symbol	8	protocadherin 1 [Source:HGNC Symbol;Acc:HGNC:8655]	4.1346	17.5647
ENSG00000154153	54463	RETREG1	protein_coding	HGNC Symbol	6	reticulophagy regulator 1 [Source:HGNC Symbol;Acc:HGNC:25964]	4.14483	17.6896
ENSG00000170537	79905	TMC7	protein_coding	HGNC Symbol	5	transmembrane channel like 7 [Source:HGNC Symbol;Acc:HGNC:23000]	4.14929	17.7443
ENSG00000112812	10279	PRSS16	protein_coding	HGNC Symbol	20	serine protease 16 [Source:HGNC Symbol;Acc:HGNC:9480]	4.15485	17.8129
ENSG00000198515	1259	CNGA1	protein_coding	HGNC Symbol	9	cyclic nucleotide gated channel subunit alpha 1 [Source:HGNC Symbol;Acc:HGNC:2148]	4.16971	17.9974
ENSG00000198185	55713	ZNF334	protein_coding	HGNC Symbol	6	zinc finger protein 334 [Source:HGNC Symbol;Acc:HGNC:15806]	4.17341	18.0436
ENSG00000152503	55521	TRIM36	protein_coding	HGNC Symbol	10	tripartite motif containing 36 [Source:HGNC Symbol;Acc:HGNC:16280]	4.17817	18.1032
ENSG00000113209	26167	PCDHB5	protein_coding	HGNC Symbol	2	protocadherin beta 5 [Source:HGNC Symbol;Acc:HGNC:8690]	4.1788	18.1111
ENSG00000171303	3777	KCNK3	protein_coding	HGNC Symbol	2	potassium two pore domain channel subfamily K member 3 [Source:HGNC Symbol;Acc:HGNC:6278]	4.17888	18.112
ENSG00000102230	9468	PCYT1B	protein_coding	HGNC Symbol	4	phosphate cytidylyltransferase 1, choline, beta [Source:HGNC Symbol;Acc:HGNC:8755]	4.18027	18.1296
ENSG00000225036	NA	CDK4P1	processed_pseudogene	HGNC Symbol	1	cyclin dependent kinase 4 pseudogene 1 [Source:HGNC Symbol;Acc:HGNC:19040]	4.18181	18.1489
ENSG00000164093	5308	PITX2	protein_coding	HGNC Symbol	14	paired like homeodomain 2 [Source:HGNC Symbol;Acc:HGNC:9005]	4.18851	18.2334
ENSG00000101210	1917	EEF1A2	protein_coding	HGNC Symbol	7	eukaryotic translation elongation factor 1 alpha 2 [Source:HGNC Symbol;Acc:HGNC:3192]	4.19009	18.2533
ENSG00000224184	NA	MIR3681HG	lncRNA	HGNC Symbol	15	MIR3681 host gene [Source:HGNC Symbol;Acc:HGNC:52001]	4.19333	18.2945
ENSG00000143590	1944	EFNA3	protein_coding	HGNC Symbol	3	ephrin A3 [Source:HGNC Symbol;Acc:HGNC:3223]	4.19395	18.3022
ENSG00000149418	6768	ST14	protein_coding	HGNC Symbol	4	suppression of tumorigenicity 14 [Source:HGNC Symbol;Acc:HGNC:11344]	4.19408	18.304
ENSG00000146592	9586	CREB5	protein_coding	HGNC Symbol	15	cAMP responsive element binding protein 5 [Source:HGNC Symbol;Acc:HGNC:16844]	4.2001	18.3804
ENSG00000165731	5979	RET	protein_coding	HGNC Symbol	9	ret proto-oncogene [Source:HGNC Symbol;Acc:HGNC:9967]	4.20612	18.4573
ENSG00000140986	6123	RPL3L	protein_coding	HGNC Symbol	3	ribosomal protein L3 like [Source:HGNC Symbol;Acc:HGNC:10351]	4.21044	18.5127
ENSG00000150054	143098	MPP7	protein_coding	HGNC Symbol	8	membrane palmitoylated protein 7 [Source:HGNC Symbol;Acc:HGNC:26542]	4.21522	18.5741
ENSG00000129595	64097	EPB41L4A	protein_coding	HGNC Symbol	11	erythrocyte membrane protein band 4.1 like 4A [Source:HGNC Symbol;Acc:HGNC:13278]	4.21833	18.6142
ENSG00000165194	57526	PCDH19	protein_coding	HGNC Symbol	5	protocadherin 19 [Source:HGNC Symbol;Acc:HGNC:14270]	4.21972	18.6321
ENSG00000173227	91683	SYT12	protein_coding	HGNC Symbol	7	synaptotagmin 12 [Source:HGNC Symbol;Acc:HGNC:18381]	4.22049	18.6421
ENSG00000184916	3714	JAG2	protein_coding	HGNC Symbol	5	jagged canonical Notch ligand 2 [Source:HGNC Symbol;Acc:HGNC:6189]	4.2215	18.6552
ENSG00000145198	90113	VWA5B2	protein_coding	HGNC Symbol	6	von Willebrand factor A domain containing 5B2 [Source:HGNC Symbol;Acc:HGNC:25144]	4.22873	18.7489
ENSG00000233532	NA	LINC00460	lncRNA	HGNC Symbol	7	long intergenic non-protein coding RNA 460 [Source:HGNC Symbol;Acc:HGNC:42809]	4.23062	18.7734
ENSG00000007264	4145	MATK	protein_coding	HGNC Symbol	15	megakaryocyte-associated tyrosine kinase [Source:HGNC Symbol;Acc:HGNC:6906]	4.24512	18.9631
ENSG00000058404	816	CAMK2B	protein_coding	HGNC Symbol	26	calcium/calmodulin dependent protein kinase II beta [Source:HGNC Symbol;Acc:HGNC:1461]	4.24689	18.9863
ENSG00000141524	11322	TMC6	protein_coding	HGNC Symbol	24	transmembrane channel like 6 [Source:HGNC Symbol;Acc:HGNC:18021]	4.25706	19.1207
ENSG00000248383	56135	PCDHAC1	protein_coding	HGNC Symbol	2	protocadherin alpha subfamily C, 1 [Source:HGNC Symbol;Acc:HGNC:8676]	4.2593	19.1504
ENSG00000159713	51673	TPPP3	protein_coding	HGNC Symbol	5	tubulin polymerization promoting protein family member 3 [Source:HGNC Symbol;Acc:HGNC:24162]	4.26718	19.2552
ENSG00000121743	2700	GJA3	protein_coding	HGNC Symbol	1	gap junction protein alpha 3 [Source:HGNC Symbol;Acc:HGNC:4277]	4.2718	19.317
ENSG00000079385	634	CEACAM1	protein_coding	HGNC Symbol	14	CEA cell adhesion molecule 1 [Source:HGNC Symbol;Acc:HGNC:1814]	4.27867	19.4092
ENSG00000179104	160335	TMTC2	protein_coding	HGNC Symbol	5	transmembrane O-mannosyltransferase targeting cadherins 2 [Source:HGNC Symbol;Acc:HGNC:25440]	4.28088	19.4389
ENSG00000166407	4004	LMO1	protein_coding	HGNC Symbol	4	LIM domain only 1 [Source:HGNC Symbol;Acc:HGNC:6641]	4.2824	19.4594
ENSG00000126217	23263	MCF2L	protein_coding	HGNC Symbol	32	MCF.2 cell line derived transforming sequence like [Source:HGNC Symbol;Acc:HGNC:14576]	4.28668	19.5173
ENSG00000158106	114822	RHPN1	protein_coding	HGNC Symbol	3	rhophilin Rho GTPase binding protein 1 [Source:HGNC Symbol;Acc:HGNC:19973]	4.28927	19.5523
ENSG00000128052	3791	KDR	protein_coding	HGNC Symbol	4	kinase insert domain receptor [Source:HGNC Symbol;Acc:HGNC:6307]	4.2937	19.6125
ENSG00000087085	43	ACHE	protein_coding	HGNC Symbol	14	acetylcholinesterase (Cartwright blood group) [Source:HGNC Symbol;Acc:HGNC:108]	4.29834	19.6756
ENSG00000118785	6696	SPP1	protein_coding	HGNC Symbol	11	secreted phosphoprotein 1 [Source:HGNC Symbol;Acc:HGNC:11255]	4.29894	19.6839
ENSG00000119866	53335	BCL11A	protein_coding	HGNC Symbol	27	BAF chromatin remodeling complex subunit BCL11A [Source:HGNC Symbol;Acc:HGNC:13221]	4.30067	19.7074
ENSG00000130940	54897	CASZ1	protein_coding	HGNC Symbol	9	castor zinc finger 1 [Source:HGNC Symbol;Acc:HGNC:26002]	4.30751	19.8011
ENSG00000155367	333926	PPM1J	protein_coding	HGNC Symbol	5	protein phosphatase, Mg2+/Mn2+ dependent 1J [Source:HGNC Symbol;Acc:HGNC:20785]	4.31452	19.8976
ENSG00000130294	547	KIF1A	protein_coding	HGNC Symbol	31	kinesin family member 1A [Source:HGNC Symbol;Acc:HGNC:888]	4.32438	20.034
ENSG00000105088	93145	OLFM2	protein_coding	HGNC Symbol	5	olfactomedin 2 [Source:HGNC Symbol;Acc:HGNC:17189]	4.32471	20.0386
ENSG00000109255	10874	NMU	protein_coding	HGNC Symbol	6	neuromedin U [Source:HGNC Symbol;Acc:HGNC:7859]	4.32723	20.0737
ENSG00000123977	164781	DAW1	protein_coding	HGNC Symbol	5	dynein assembly factor with WD repeats 1 [Source:HGNC Symbol;Acc:HGNC:26383]	4.33015	20.1142
ENSG00000184005	256435	ST6GALNAC3	protein_coding	HGNC Symbol	3	ST6 N-acetylgalactosaminide alpha-2,6-sialyltransferase 3 [Source:HGNC Symbol;Acc:HGNC:19343]	4.34191	20.2789
ENSG00000267013	NA	LINC01929	lncRNA	HGNC Symbol	3	long intergenic non-protein coding RNA 1929 [Source:HGNC Symbol;Acc:HGNC:52751]	4.34538	20.3278
ENSG00000128564	7425	VGF	protein_coding	HGNC Symbol	3	VGF nerve growth factor inducible [Source:HGNC Symbol;Acc:HGNC:12684]	4.35867	20.5159
ENSG00000167642	10653	SPINT2	protein_coding	HGNC Symbol	11	serine peptidase inhibitor, Kunitz type 2 [Source:HGNC Symbol;Acc:HGNC:11247]	4.38071	20.8317
ENSG00000198400	4914	NTRK1	protein_coding	HGNC Symbol	10	neurotrophic receptor tyrosine kinase 1 [Source:HGNC Symbol;Acc:HGNC:8031]	4.38218	20.853
ENSG00000177459	203111	ERICH5	protein_coding	HGNC Symbol	2	glutamate rich 5 [Source:HGNC Symbol;Acc:HGNC:26823]	4.38573	20.9044
ENSG00000226622	NA	AC092155.1	lncRNA	Clone-based (Ensembl) gene	33	novel transcript	4.38651	20.9157
ENSG00000152270	5140	PDE3B	protein_coding	HGNC Symbol	5	phosphodiesterase 3B [Source:HGNC Symbol;Acc:HGNC:8779]	4.38917	20.9542
ENSG00000260926	NA	AC016134.1	lncRNA	Clone-based (Ensembl) gene	11	novel transcript	4.39205	20.9961
ENSG00000068078	2261	FGFR3	protein_coding	HGNC Symbol	11	fibroblast growth factor receptor 3 [Source:HGNC Symbol;Acc:HGNC:3690]	4.39324	21.0134
ENSG00000117016	9783	RIMS3	protein_coding	HGNC Symbol	2	regulating synaptic membrane exocytosis 3 [Source:HGNC Symbol;Acc:HGNC:21292]	4.39583	21.0513
ENSG00000205363	388135	INSYN1	protein_coding	HGNC Symbol	4	inhibitory synaptic factor 1 [Source:HGNC Symbol;Acc:HGNC:33753]	4.40879	21.2411
ENSG00000130477	23025	UNC13A	protein_coding	HGNC Symbol	7	unc-13 homolog A [Source:HGNC Symbol;Acc:HGNC:23150]	4.40916	21.2466
ENSG00000040608	65078	RTN4R	protein_coding	HGNC Symbol	6	reticulon 4 receptor [Source:HGNC Symbol;Acc:HGNC:18601]	4.41652	21.3552
ENSG00000140057	122481	AK7	protein_coding	HGNC Symbol	5	adenylate kinase 7 [Source:HGNC Symbol;Acc:HGNC:20091]	4.42987	21.5539
ENSG00000144730	54756	IL17RD	protein_coding	HGNC Symbol	8	interleukin 17 receptor D [Source:HGNC Symbol;Acc:HGNC:17616]	4.43001	21.5558
ENSG00000087250	4504	MT3	protein_coding	HGNC Symbol	6	metallothionein 3 [Source:HGNC Symbol;Acc:HGNC:7408]	4.43037	21.5612
ENSG00000166165	1152	CKB	protein_coding	HGNC Symbol	17	creatine kinase B [Source:HGNC Symbol;Acc:HGNC:1991]	4.44429	21.7703
ENSG00000128045	65997	RASL11B	protein_coding	HGNC Symbol	3	RAS like family 11 member B [Source:HGNC Symbol;Acc:HGNC:23804]	4.44694	21.8103
ENSG00000104332	6422	SFRP1	protein_coding	HGNC Symbol	2	secreted frizzled related protein 1 [Source:HGNC Symbol;Acc:HGNC:10776]	4.45027	21.8607
ENSG00000198785	116443	GRIN3A	protein_coding	HGNC Symbol	2	glutamate ionotropic receptor NMDA type subunit 3A [Source:HGNC Symbol;Acc:HGNC:16767]	4.45745	21.9698
ENSG00000154928	2047	EPHB1	protein_coding	HGNC Symbol	13	EPH receptor B1 [Source:HGNC Symbol;Acc:HGNC:3392]	4.46358	22.0633
ENSG00000104892	147700	KLC3	protein_coding	HGNC Symbol	7	kinesin light chain 3 [Source:HGNC Symbol;Acc:HGNC:20717]	4.46595	22.0996
ENSG00000168334	165904	XIRP1	protein_coding	HGNC Symbol	3	xin actin binding repeat containing 1 [Source:HGNC Symbol;Acc:HGNC:14301]	4.46618	22.1032
ENSG00000065320	9423	NTN1	protein_coding	HGNC Symbol	2	netrin 1 [Source:HGNC Symbol;Acc:HGNC:8029]	4.46991	22.1604
ENSG00000089199	1114	CHGB	protein_coding	HGNC Symbol	3	chromogranin B [Source:HGNC Symbol;Acc:HGNC:1930]	4.47133	22.1821
ENSG00000148426	254427	PROSER2	protein_coding	HGNC Symbol	5	proline and serine rich 2 [Source:HGNC Symbol;Acc:HGNC:23728]	4.48126	22.3354
ENSG00000164362	7015	TERT	protein_coding	HGNC Symbol	7	telomerase reverse transcriptase [Source:HGNC Symbol;Acc:HGNC:11730]	4.48289	22.3607
ENSG00000138316	140766	ADAMTS14	protein_coding	HGNC Symbol	2	ADAM metallopeptidase with thrombospondin type 1 motif 14 [Source:HGNC Symbol;Acc:HGNC:14899]	4.49951	22.6198
ENSG00000196218	6261	RYR1	protein_coding	HGNC Symbol	10	ryanodine receptor 1 [Source:HGNC Symbol;Acc:HGNC:10483]	4.50122	22.6466
ENSG00000100385	3560	IL2RB	protein_coding	HGNC Symbol	7	interleukin 2 receptor subunit beta [Source:HGNC Symbol;Acc:HGNC:6009]	4.50335	22.68
ENSG00000167207	64127	NOD2	protein_coding	HGNC Symbol	13	nucleotide binding oligomerization domain containing 2 [Source:HGNC Symbol;Acc:HGNC:5331]	4.50463	22.7001
ENSG00000183044	18	ABAT	protein_coding	HGNC Symbol	16	4-aminobutyrate aminotransferase [Source:HGNC Symbol;Acc:HGNC:23]	4.50524	22.7097
ENSG00000169129	84632	AFAP1L2	protein_coding	HGNC Symbol	6	actin filament associated protein 1 like 2 [Source:HGNC Symbol;Acc:HGNC:25901]	4.50848	22.7608
ENSG00000161082	60680	CELF5	protein_coding	HGNC Symbol	8	CUGBP Elav-like family member 5 [Source:HGNC Symbol;Acc:HGNC:14058]	4.5102	22.7879
ENSG00000109265	57482	CRACD	protein_coding	HGNC Symbol	9	capping protein inhibiting regulator of actin dynamics [Source:HGNC Symbol;Acc:HGNC:29219]	4.51724	22.8994
ENSG00000125798	3170	FOXA2	protein_coding	HGNC Symbol	2	forkhead box A2 [Source:HGNC Symbol;Acc:HGNC:5022]	4.52375	23.0031
ENSG00000187123	130574	LYPD6	protein_coding	HGNC Symbol	6	LY6/PLAUR domain containing 6 [Source:HGNC Symbol;Acc:HGNC:28751]	4.53941	23.2541
ENSG00000131471	8639	AOC3	protein_coding	HGNC Symbol	7	amine oxidase copper containing 3 [Source:HGNC Symbol;Acc:HGNC:550]	4.54759	23.3862
ENSG00000168306	8309	ACOX2	protein_coding	HGNC Symbol	13	acyl-CoA oxidase 2 [Source:HGNC Symbol;Acc:HGNC:120]	4.55561	23.5166
ENSG00000232040	114821	ZBED9	protein_coding	HGNC Symbol	5	zinc finger BED-type containing 9 [Source:HGNC Symbol;Acc:HGNC:13851]	4.55726	23.5435
ENSG00000278811	NA	LINC00624	lncRNA	HGNC Symbol	2	long intergenic non-protein coding RNA 624 [Source:HGNC Symbol;Acc:HGNC:44254]	4.55738	23.5455
ENSG00000105357	79784	MYH14	protein_coding	HGNC Symbol	12	myosin heavy chain 14 [Source:HGNC Symbol;Acc:HGNC:23212]	4.5699	23.7508
ENSG00000177380	8541	PPFIA3	protein_coding	HGNC Symbol	13	PTPRF interacting protein alpha 3 [Source:HGNC Symbol;Acc:HGNC:9247]	4.57665	23.8622
ENSG00000095713	55118	CRTAC1	protein_coding	HGNC Symbol	6	cartilage acidic protein 1 [Source:HGNC Symbol;Acc:HGNC:14882]	4.57902	23.9014
ENSG00000105642	3780	KCNN1	protein_coding	HGNC Symbol	4	potassium calcium-activated channel subfamily N member 1 [Source:HGNC Symbol;Acc:HGNC:6290]	4.57932	23.9064
ENSG00000228222	NA	AC073050.1	lncRNA	Clone-based (Ensembl) gene	1	novel transcript (hCG1660379)	4.58113	23.9364
ENSG00000204060	100132074	FOXO6	protein_coding	HGNC Symbol	2	forkhead box O6 [Source:HGNC Symbol;Acc:HGNC:24814]	4.59132	24.106
ENSG00000179148	59344	ALOXE3	protein_coding	HGNC Symbol	4	arachidonate lipoxygenase 3 [Source:HGNC Symbol;Acc:HGNC:13743]	4.59317	24.1369
ENSG00000153162	654	BMP6	protein_coding	HGNC Symbol	1	bone morphogenetic protein 6 [Source:HGNC Symbol;Acc:HGNC:1073]	4.5943	24.1559
ENSG00000182134	11022	TDRKH	protein_coding	HGNC Symbol	15	tudor and KH domain containing [Source:HGNC Symbol;Acc:HGNC:11713]	4.59441	24.1578
ENSG00000170608	3171	FOXA3	protein_coding	HGNC Symbol	2	forkhead box A3 [Source:HGNC Symbol;Acc:HGNC:5023]	4.59758	24.2108
ENSG00000177875	387856	CCDC184	protein_coding	HGNC Symbol	1	coiled-coil domain containing 184 [Source:HGNC Symbol;Acc:HGNC:33749]	4.60611	24.3543
ENSG00000179403	64856	VWA1	protein_coding	HGNC Symbol	4	von Willebrand factor A domain containing 1 [Source:HGNC Symbol;Acc:HGNC:30910]	4.60614	24.3549
ENSG00000177181	284716	RIMKLA	protein_coding	HGNC Symbol	2	ribosomal modification protein rimK like family member A [Source:HGNC Symbol;Acc:HGNC:28725]	4.61095	24.4362
ENSG00000178821	339456	TMEM52	protein_coding	HGNC Symbol	6	transmembrane protein 52 [Source:HGNC Symbol;Acc:HGNC:27916]	4.62571	24.6875
ENSG00000006432	4293	MAP3K9	protein_coding	HGNC Symbol	7	mitogen-activated protein kinase kinase kinase 9 [Source:HGNC Symbol;Acc:HGNC:6861]	4.62648	24.7006
ENSG00000145491	83853	ROPN1L	protein_coding	HGNC Symbol	5	rhophilin associated tail protein 1 like [Source:HGNC Symbol;Acc:HGNC:24060]	4.63219	24.7987
ENSG00000231584	NA	FAHD2CP	transcribed_unprocessed_pseudogene	HGNC Symbol	5	fumarylacetoacetate hydrolase domain containing 2C, pseudogene [Source:HGNC Symbol;Acc:HGNC:44135]	4.65256	25.1513
ENSG00000125355	55026	TMEM255A	protein_coding	HGNC Symbol	6	transmembrane protein 255A [Source:HGNC Symbol;Acc:HGNC:26086]	4.65812	25.2483
ENSG00000172238	474	ATOH1	protein_coding	HGNC Symbol	1	atonal bHLH transcription factor 1 [Source:HGNC Symbol;Acc:HGNC:797]	4.66279	25.3303
ENSG00000172733	29942	PURG	protein_coding	HGNC Symbol	3	purine rich element binding protein G [Source:HGNC Symbol;Acc:HGNC:17930]	4.66376	25.3473
ENSG00000006283	8913	CACNA1G	protein_coding	HGNC Symbol	34	calcium voltage-gated channel subunit alpha1 G [Source:HGNC Symbol;Acc:HGNC:1394]	4.66777	25.4178
ENSG00000234155	NA	LINC02535	lncRNA	HGNC Symbol	1	long intergenic non-protein coding RNA 2535 [Source:HGNC Symbol;Acc:HGNC:53569]	4.67882	25.6133
ENSG00000183682	353500	BMP8A	protein_coding	HGNC Symbol	1	bone morphogenetic protein 8a [Source:HGNC Symbol;Acc:HGNC:21650]	4.69669	25.9326
ENSG00000183873	6331	SCN5A	protein_coding	HGNC Symbol	14	sodium voltage-gated channel alpha subunit 5 [Source:HGNC Symbol;Acc:HGNC:10593]	4.70487	26.08
ENSG00000241472	NA	PTPRG-AS1	lncRNA	HGNC Symbol	26	PTPRG antisense RNA 1 [Source:HGNC Symbol;Acc:HGNC:44638]	4.71	26.1729
ENSG00000170345	2353	FOS	protein_coding	HGNC Symbol	10	Fos proto-oncogene, AP-1 transcription factor subunit [Source:HGNC Symbol;Acc:HGNC:3796]	4.71737	26.3069
ENSG00000105664	1311	COMP	protein_coding	HGNC Symbol	4	cartilage oligomeric matrix protein [Source:HGNC Symbol;Acc:HGNC:2227]	4.72177	26.3872
ENSG00000165215	1365	CLDN3	protein_coding	HGNC Symbol	1	claudin 3 [Source:HGNC Symbol;Acc:HGNC:2045]	4.7222	26.3952
ENSG00000231185	NA	SPRY4-AS1	lncRNA	HGNC Symbol	7	SPRY4 antisense RNA 1 [Source:HGNC Symbol;Acc:HGNC:53465]	4.7322	26.5787
ENSG00000110328	374378	GALNT18	protein_coding	HGNC Symbol	2	polypeptide N-acetylgalactosaminyltransferase 18 [Source:HGNC Symbol;Acc:HGNC:30488]	4.73559	26.6413
ENSG00000148677	27063	ANKRD1	protein_coding	HGNC Symbol	1	ankyrin repeat domain 1 [Source:HGNC Symbol;Acc:HGNC:15819]	4.73668	26.6615
ENSG00000131242	84440	RAB11FIP4	protein_coding	HGNC Symbol	11	RAB11 family interacting protein 4 [Source:HGNC Symbol;Acc:HGNC:30267]	4.73943	26.7123
ENSG00000009694	10178	TENM1	protein_coding	HGNC Symbol	3	teneurin transmembrane protein 1 [Source:HGNC Symbol;Acc:HGNC:8117]	4.74292	26.777
ENSG00000136573	640	BLK	protein_coding	HGNC Symbol	7	BLK proto-oncogene, Src family tyrosine kinase [Source:HGNC Symbol;Acc:HGNC:1057]	4.74585	26.8313
ENSG00000187554	7100	TLR5	protein_coding	HGNC Symbol	8	toll like receptor 5 [Source:HGNC Symbol;Acc:HGNC:11851]	4.74645	26.8425
ENSG00000176595	9920	KBTBD11	protein_coding	HGNC Symbol	1	kelch repeat and BTB domain containing 11 [Source:HGNC Symbol;Acc:HGNC:29104]	4.7518	26.9423
ENSG00000135424	3679	ITGA7	protein_coding	HGNC Symbol	20	integrin subunit alpha 7 [Source:HGNC Symbol;Acc:HGNC:6143]	4.7579	27.0564
ENSG00000074370	489	ATP2A3	protein_coding	HGNC Symbol	15	ATPase sarcoplasmic/endoplasmic reticulum Ca2+ transporting 3 [Source:HGNC Symbol;Acc:HGNC:813]	4.75794	27.0572
ENSG00000187867	342979	PALM3	protein_coding	HGNC Symbol	4	paralemmin 3 [Source:HGNC Symbol;Acc:HGNC:33274]	4.76321	27.1561
ENSG00000153208	10461	MERTK	protein_coding	HGNC Symbol	7	MER proto-oncogene, tyrosine kinase [Source:HGNC Symbol;Acc:HGNC:7027]	4.76571	27.2032
ENSG00000169894	4584	MUC3A	protein_coding	HGNC Symbol	4	mucin 3A, cell surface associated [Source:HGNC Symbol;Acc:HGNC:7513]	4.76758	27.2387
ENSG00000169252	154	ADRB2	protein_coding	HGNC Symbol	1	adrenoceptor beta 2 [Source:HGNC Symbol;Acc:HGNC:286]	4.78188	27.5099
ENSG00000060140	55359	STYK1	protein_coding	HGNC Symbol	6	serine/threonine/tyrosine kinase 1 [Source:HGNC Symbol;Acc:HGNC:18889]	4.78454	27.5608
ENSG00000166670	4319	MMP10	protein_coding	HGNC Symbol	2	matrix metallopeptidase 10 [Source:HGNC Symbol;Acc:HGNC:7156]	4.78748	27.6169
ENSG00000100985	4318	MMP9	protein_coding	HGNC Symbol	1	matrix metallopeptidase 9 [Source:HGNC Symbol;Acc:HGNC:7176]	4.81584	28.1651
ENSG00000110799	7450	VWF	protein_coding	HGNC Symbol	9	von Willebrand factor [Source:HGNC Symbol;Acc:HGNC:12726]	4.81616	28.1714
ENSG00000100505	114088	TRIM9	protein_coding	HGNC Symbol	6	tripartite motif containing 9 [Source:HGNC Symbol;Acc:HGNC:16288]	4.82133	28.2726
ENSG00000095587	7093	TLL2	protein_coding	HGNC Symbol	3	tolloid like 2 [Source:HGNC Symbol;Acc:HGNC:11844]	4.82233	28.2922
ENSG00000172602	27289	RND1	protein_coding	HGNC Symbol	6	Rho family GTPase 1 [Source:HGNC Symbol;Acc:HGNC:18314]	4.83067	28.4561
ENSG00000154917	51560	RAB6B	protein_coding	HGNC Symbol	7	RAB6B, member RAS oncogene family [Source:HGNC Symbol;Acc:HGNC:14902]	4.83268	28.4959
ENSG00000146411	154091	SLC2A12	protein_coding	HGNC Symbol	1	solute carrier family 2 member 12 [Source:HGNC Symbol;Acc:HGNC:18067]	4.83313	28.5047
ENSG00000198948	9848	MFAP3L	protein_coding	HGNC Symbol	11	microfibril associated protein 3 like [Source:HGNC Symbol;Acc:HGNC:29083]	4.83776	28.5965
ENSG00000110195	2348	FOLR1	protein_coding	HGNC Symbol	4	folate receptor alpha [Source:HGNC Symbol;Acc:HGNC:3791]	4.84635	28.7672
ENSG00000230666	NA	CEACAM22P	transcribed_unprocessed_pseudogene	HGNC Symbol	3	CEA cell adhesion molecule 22, pseudogene [Source:HGNC Symbol;Acc:HGNC:38029]	4.8482	28.804
ENSG00000110680	796	CALCA	protein_coding	HGNC Symbol	6	calcitonin related polypeptide alpha [Source:HGNC Symbol;Acc:HGNC:1437]	4.85614	28.9631
ENSG00000085741	7481	WNT11	protein_coding	HGNC Symbol	4	Wnt family member 11 [Source:HGNC Symbol;Acc:HGNC:12776]	4.85758	28.992
ENSG00000006016	9244	CRLF1	protein_coding	HGNC Symbol	5	cytokine receptor like factor 1 [Source:HGNC Symbol;Acc:HGNC:2364]	4.86794	29.2008
ENSG00000158825	978	CDA	protein_coding	HGNC Symbol	2	cytidine deaminase [Source:HGNC Symbol;Acc:HGNC:1712]	4.8737	29.3177
ENSG00000136943	1515	CTSV	protein_coding	HGNC Symbol	3	cathepsin V [Source:HGNC Symbol;Acc:HGNC:2538]	4.87841	29.4136
ENSG00000077616	10003	NAALAD2	protein_coding	HGNC Symbol	10	N-acetylated alpha-linked acidic dipeptidase 2 [Source:HGNC Symbol;Acc:HGNC:14526]	4.88435	29.535
ENSG00000155495	9947	MAGEC1	protein_coding	HGNC Symbol	2	MAGE family member C1 [Source:HGNC Symbol;Acc:HGNC:6812]	4.89159	29.6834
ENSG00000007516	8938	BAIAP3	protein_coding	HGNC Symbol	16	BAI1 associated protein 3 [Source:HGNC Symbol;Acc:HGNC:948]	4.89487	29.7512
ENSG00000105825	7980	TFPI2	protein_coding	HGNC Symbol	6	tissue factor pathway inhibitor 2 [Source:HGNC Symbol;Acc:HGNC:11761]	4.89911	29.8386
ENSG00000119698	57718	PPP4R4	protein_coding	HGNC Symbol	6	protein phosphatase 4 regulatory subunit 4 [Source:HGNC Symbol;Acc:HGNC:23788]	4.90818	30.0267
ENSG00000257743	93432	MGAM2	protein_coding	HGNC Symbol	3	maltase-glucoamylase 2 (putative) [Source:HGNC Symbol;Acc:HGNC:28101]	4.91277	30.1225
ENSG00000185924	146760	RTN4RL1	protein_coding	HGNC Symbol	1	reticulon 4 receptor like 1 [Source:HGNC Symbol;Acc:HGNC:21329]	4.91751	30.2216
ENSG00000101670	9388	LIPG	protein_coding	HGNC Symbol	7	lipase G, endothelial type [Source:HGNC Symbol;Acc:HGNC:6623]	4.91969	30.2673
ENSG00000117707	5629	PROX1	protein_coding	HGNC Symbol	7	prospero homeobox 1 [Source:HGNC Symbol;Acc:HGNC:9459]	4.92409	30.3599
ENSG00000106236	4885	NPTX2	protein_coding	HGNC Symbol	2	neuronal pentraxin 2 [Source:HGNC Symbol;Acc:HGNC:7953]	4.92902	30.4638
ENSG00000240602	NA	AADACP1	transcribed_unprocessed_pseudogene	HGNC Symbol	6	arylacetamide deacetylase pseudogene 1 [Source:HGNC Symbol;Acc:HGNC:50305]	4.9335	30.5585
ENSG00000196208	9687	GREB1	protein_coding	HGNC Symbol	10	growth regulating estrogen receptor binding 1 [Source:HGNC Symbol;Acc:HGNC:24885]	4.93487	30.5875
ENSG00000185818	339983	NAT8L	protein_coding	HGNC Symbol	1	N-acetyltransferase 8 like [Source:HGNC Symbol;Acc:HGNC:26742]	4.94345	30.77
ENSG00000112218	81491	GPR63	protein_coding	HGNC Symbol	1	G protein-coupled receptor 63 [Source:HGNC Symbol;Acc:HGNC:13302]	4.94445	30.7912
ENSG00000164687	2171	FABP5	protein_coding	HGNC Symbol	4	fatty acid binding protein 5 [Source:HGNC Symbol;Acc:HGNC:3560]	4.95307	30.9759
ENSG00000095932	284422	SMIM24	protein_coding	HGNC Symbol	4	small integral membrane protein 24 [Source:HGNC Symbol;Acc:HGNC:37244]	4.95373	30.9899
ENSG00000001617	6405	SEMA3F	protein_coding	HGNC Symbol	9	semaphorin 3F [Source:HGNC Symbol;Acc:HGNC:10728]	4.9554	31.0259
ENSG00000148803	282969	FUOM	protein_coding	HGNC Symbol	6	fucose mutarotase [Source:HGNC Symbol;Acc:HGNC:24733]	4.96029	31.1313
ENSG00000217236	100131390	SP9	protein_coding	HGNC Symbol	1	Sp9 transcription factor [Source:HGNC Symbol;Acc:HGNC:30690]	4.97215	31.3881
ENSG00000105696	25789	TMEM59L	protein_coding	HGNC Symbol	5	transmembrane protein 59 like [Source:HGNC Symbol;Acc:HGNC:13237]	4.97389	31.426
ENSG00000196557	8912	CACNA1H	protein_coding	HGNC Symbol	12	calcium voltage-gated channel subunit alpha1 H [Source:HGNC Symbol;Acc:HGNC:1395]	4.9825	31.6141
ENSG00000123407	3228	HOXC12	protein_coding	HGNC Symbol	1	homeobox C12 [Source:HGNC Symbol;Acc:HGNC:5124]	4.99055	31.7911
ENSG00000214814	654463	FER1L6	protein_coding	HGNC Symbol	1	fer-1 like family member 6 [Source:HGNC Symbol;Acc:HGNC:28065]	4.99124	31.8063
ENSG00000135114	8638	OASL	protein_coding	HGNC Symbol	4	2'-5'-oligoadenylate synthetase like [Source:HGNC Symbol;Acc:HGNC:8090]	4.99819	31.9599
ENSG00000129538	6035	RNASE1	protein_coding	HGNC Symbol	5	ribonuclease A family member 1, pancreatic [Source:HGNC Symbol;Acc:HGNC:10044]	5.00179	32.0397
ENSG00000064195	1747	DLX3	protein_coding	HGNC Symbol	2	distal-less homeobox 3 [Source:HGNC Symbol;Acc:HGNC:2916]	5.0041	32.091
ENSG00000198088	54830	NUP62CL	protein_coding	HGNC Symbol	4	nucleoporin 62 C-terminal like [Source:HGNC Symbol;Acc:HGNC:25960]	5.00691	32.1536
ENSG00000115112	29842	TFCP2L1	protein_coding	HGNC Symbol	2	transcription factor CP2 like 1 [Source:HGNC Symbol;Acc:HGNC:17925]	5.0172	32.3839
ENSG00000177807	3766	KCNJ10	protein_coding	HGNC Symbol	10	potassium inwardly rectifying channel subfamily J member 10 [Source:HGNC Symbol;Acc:HGNC:6256]	5.02951	32.6614
ENSG00000092051	84502	JPH4	protein_coding	HGNC Symbol	5	junctophilin 4 [Source:HGNC Symbol;Acc:HGNC:20156]	5.04513	33.0169
ENSG00000147255	3547	IGSF1	protein_coding	HGNC Symbol	17	immunoglobulin superfamily member 1 [Source:HGNC Symbol;Acc:HGNC:5948]	5.04615	33.0402
ENSG00000256915	NA	AC090023.2	lncRNA	Clone-based (Ensembl) gene	3	novel transcript	5.04767	33.0751
ENSG00000107295	6456	SH3GL2	protein_coding	HGNC Symbol	2	SH3 domain containing GRB2 like 2, endophilin A1 [Source:HGNC Symbol;Acc:HGNC:10831]	5.04847	33.0935
ENSG00000197632	5055	SERPINB2	protein_coding	HGNC Symbol	6	serpin family B member 2 [Source:HGNC Symbol;Acc:HGNC:8584]	5.05063	33.143
ENSG00000054179	954	ENTPD2	protein_coding	HGNC Symbol	4	ectonucleoside triphosphate diphosphohydrolase 2 [Source:HGNC Symbol;Acc:HGNC:3364]	5.0554	33.2527
ENSG00000164181	79993	ELOVL7	protein_coding	HGNC Symbol	7	ELOVL fatty acid elongase 7 [Source:HGNC Symbol;Acc:HGNC:26292]	5.05833	33.3203
ENSG00000184226	5101	PCDH9	protein_coding	HGNC Symbol	6	protocadherin 9 [Source:HGNC Symbol;Acc:HGNC:8661]	5.0584	33.322
ENSG00000186642	5138	PDE2A	protein_coding	HGNC Symbol	27	phosphodiesterase 2A [Source:HGNC Symbol;Acc:HGNC:8777]	5.06001	33.3592
ENSG00000172061	131578	LRRC15	protein_coding	HGNC Symbol	2	leucine rich repeat containing 15 [Source:HGNC Symbol;Acc:HGNC:20818]	5.07289	33.6582
ENSG00000204624	57540	DISP3	protein_coding	HGNC Symbol	3	dispatched RND transporter family member 3 [Source:HGNC Symbol;Acc:HGNC:29251]	5.07693	33.7527
ENSG00000135643	27345	KCNMB4	protein_coding	HGNC Symbol	2	potassium calcium-activated channel subfamily M regulatory beta subunit 4 [Source:HGNC Symbol;Acc:HGNC:6289]	5.07758	33.7678
ENSG00000116985	656	BMP8B	protein_coding	HGNC Symbol	1	bone morphogenetic protein 8b [Source:HGNC Symbol;Acc:HGNC:1075]	5.08541	33.9517
ENSG00000182272	338707	B4GALNT4	protein_coding	HGNC Symbol	5	beta-1,4-N-acetyl-galactosaminyltransferase 4 [Source:HGNC Symbol;Acc:HGNC:26315]	5.09006	34.0613
ENSG00000146192	221472	FGD2	protein_coding	HGNC Symbol	11	FYVE, RhoGEF and PH domain containing 2 [Source:HGNC Symbol;Acc:HGNC:3664]	5.09927	34.2794
ENSG00000124466	27076	LYPD3	protein_coding	HGNC Symbol	4	LY6/PLAUR domain containing 3 [Source:HGNC Symbol;Acc:HGNC:24880]	5.10181	34.3398
ENSG00000166924	222950	NYAP1	protein_coding	HGNC Symbol	4	neuronal tyrosine phosphorylated phosphoinositide-3-kinase adaptor 1 [Source:HGNC Symbol;Acc:HGNC:22009]	5.10222	34.3497
ENSG00000197147	23507	LRRC8B	protein_coding	HGNC Symbol	6	leucine rich repeat containing 8 VRAC subunit B [Source:HGNC Symbol;Acc:HGNC:30692]	5.10452	34.4045
ENSG00000064309	50937	CDON	protein_coding	HGNC Symbol	9	cell adhesion associated, oncogene regulated [Source:HGNC Symbol;Acc:HGNC:17104]	5.11872	34.7446
ENSG00000070159	5774	PTPN3	protein_coding	HGNC Symbol	6	protein tyrosine phosphatase non-receptor type 3 [Source:HGNC Symbol;Acc:HGNC:9655]	5.1208	34.7948
ENSG00000139438	84915	FAM222A	protein_coding	HGNC Symbol	3	family with sequence similarity 222 member A [Source:HGNC Symbol;Acc:HGNC:25915]	5.12521	34.9013
ENSG00000158528	55607	PPP1R9A	protein_coding	HGNC Symbol	8	protein phosphatase 1 regulatory subunit 9A [Source:HGNC Symbol;Acc:HGNC:14946]	5.12666	34.9364
ENSG00000197444	55753	OGDHL	protein_coding	HGNC Symbol	6	oxoglutarate dehydrogenase like [Source:HGNC Symbol;Acc:HGNC:25590]	5.13757	35.2016
ENSG00000160712	3570	IL6R	protein_coding	HGNC Symbol	8	interleukin 6 receptor [Source:HGNC Symbol;Acc:HGNC:6019]	5.1454	35.3931
ENSG00000141404	2774	GNAL	protein_coding	HGNC Symbol	10	G protein subunit alpha L [Source:HGNC Symbol;Acc:HGNC:4388]	5.1561	35.6567
ENSG00000267385	NA	AC011498.4	protein_coding	Clone-based (Ensembl) gene	1	novel protein	5.16034	35.7616
ENSG00000081842	56142	PCDHA6	protein_coding	HGNC Symbol	3	protocadherin alpha 6 [Source:HGNC Symbol;Acc:HGNC:8672]	5.16569	35.8945
ENSG00000213023	84258	SYT3	protein_coding	HGNC Symbol	6	synaptotagmin 3 [Source:HGNC Symbol;Acc:HGNC:11511]	5.17154	36.0404
ENSG00000008277	53616	ADAM22	protein_coding	HGNC Symbol	11	ADAM metallopeptidase domain 22 [Source:HGNC Symbol;Acc:HGNC:201]	5.17472	36.1198
ENSG00000130751	4861	NPAS1	protein_coding	HGNC Symbol	8	neuronal PAS domain protein 1 [Source:HGNC Symbol;Acc:HGNC:7894]	5.18211	36.3054
ENSG00000112964	2690	GHR	protein_coding	HGNC Symbol	13	growth hormone receptor [Source:HGNC Symbol;Acc:HGNC:4263]	5.19546	36.6429
ENSG00000233922	NA	LINC01694	lncRNA	HGNC Symbol	4	long intergenic non-protein coding RNA 1694 [Source:HGNC Symbol;Acc:HGNC:52481]	5.20464	36.8768
ENSG00000109472	1363	CPE	protein_coding	HGNC Symbol	5	carboxypeptidase E [Source:HGNC Symbol;Acc:HGNC:2303]	5.20962	37.0043
ENSG00000206077	653082	ZDHHC11B	protein_coding	HGNC Symbol	6	zinc finger DHHC-type containing 11B [Source:HGNC Symbol;Acc:HGNC:32962]	5.21765	37.2107
ENSG00000168309	11170	FAM107A	protein_coding	HGNC Symbol	8	family with sequence similarity 107 member A [Source:HGNC Symbol;Acc:HGNC:30827]	5.21919	37.2505
ENSG00000133135	79589	RNF128	protein_coding	HGNC Symbol	3	ring finger protein 128 [Source:HGNC Symbol;Acc:HGNC:21153]	5.21921	37.2511
ENSG00000267761	NA	MIR4527HG	lncRNA	HGNC Symbol	3	MIR4527 host gene [Source:HGNC Symbol;Acc:HGNC:31724]	5.2307	37.549
ENSG00000056487	112885	PHF21B	protein_coding	HGNC Symbol	12	PHD finger protein 21B [Source:HGNC Symbol;Acc:HGNC:25161]	5.23603	37.6879
ENSG00000188848	389206	BEND4	protein_coding	HGNC Symbol	3	BEN domain containing 4 [Source:HGNC Symbol;Acc:HGNC:23815]	5.2407	37.81
ENSG00000161835	160622	GRASP	protein_coding	HGNC Symbol	8	general receptor for phosphoinositides 1 associated scaffold protein [Source:HGNC Symbol;Acc:HGNC:18707]	5.25842	38.2773
ENSG00000066056	7075	TIE1	protein_coding	HGNC Symbol	10	tyrosine kinase with immunoglobulin like and EGF like domains 1 [Source:HGNC Symbol;Acc:HGNC:11809]	5.26273	38.3918
ENSG00000131398	3748	KCNC3	protein_coding	HGNC Symbol	4	potassium voltage-gated channel subfamily C member 3 [Source:HGNC Symbol;Acc:HGNC:6235]	5.28031	38.8625
ENSG00000154639	1525	CXADR	protein_coding	HGNC Symbol	5	CXADR Ig-like cell adhesion molecule [Source:HGNC Symbol;Acc:HGNC:2559]	5.28511	38.9921
ENSG00000153898	255231	MCOLN2	protein_coding	HGNC Symbol	6	mucolipin 2 [Source:HGNC Symbol;Acc:HGNC:13357]	5.28963	39.1144
ENSG00000067840	57595	PDZD4	protein_coding	HGNC Symbol	9	PDZ domain containing 4 [Source:HGNC Symbol;Acc:HGNC:21167]	5.29041	39.1357
ENSG00000204970	56147	PCDHA1	protein_coding	HGNC Symbol	3	protocadherin alpha 1 [Source:HGNC Symbol;Acc:HGNC:8663]	5.29739	39.3254
ENSG00000183484	29933	GPR132	protein_coding	HGNC Symbol	6	G protein-coupled receptor 132 [Source:HGNC Symbol;Acc:HGNC:17482]	5.30616	39.5651
ENSG00000112320	55084	SOBP	protein_coding	HGNC Symbol	4	sine oculis binding protein homolog [Source:HGNC Symbol;Acc:HGNC:29256]	5.30741	39.5995
ENSG00000165521	161436	EML5	protein_coding	HGNC Symbol	8	EMAP like 5 [Source:HGNC Symbol;Acc:HGNC:18197]	5.3169	39.8608
ENSG00000184058	6899	TBX1	protein_coding	HGNC Symbol	6	T-box transcription factor 1 [Source:HGNC Symbol;Acc:HGNC:11592]	5.32403	40.0584
ENSG00000139044	283358	B4GALNT3	protein_coding	HGNC Symbol	7	beta-1,4-N-acetyl-galactosaminyltransferase 3 [Source:HGNC Symbol;Acc:HGNC:24137]	5.32763	40.1584
ENSG00000171903	57834	CYP4F11	protein_coding	HGNC Symbol	5	cytochrome P450 family 4 subfamily F member 11 [Source:HGNC Symbol;Acc:HGNC:13265]	5.32942	40.2081
ENSG00000203727	389432	SAMD5	protein_coding	HGNC Symbol	2	sterile alpha motif domain containing 5 [Source:HGNC Symbol;Acc:HGNC:21180]	5.32959	40.213
ENSG00000205744	79958	DENND1C	protein_coding	HGNC Symbol	14	DENN domain containing 1C [Source:HGNC Symbol;Acc:HGNC:26225]	5.32972	40.2166
ENSG00000019186	1591	CYP24A1	protein_coding	HGNC Symbol	6	cytochrome P450 family 24 subfamily A member 1 [Source:HGNC Symbol;Acc:HGNC:2602]	5.33363	40.3257
ENSG00000171450	8941	CDK5R2	protein_coding	HGNC Symbol	1	cyclin dependent kinase 5 regulatory subunit 2 [Source:HGNC Symbol;Acc:HGNC:1776]	5.34319	40.5938
ENSG00000092096	51310	SLC22A17	protein_coding	HGNC Symbol	10	solute carrier family 22 member 17 [Source:HGNC Symbol;Acc:HGNC:23095]	5.34328	40.5964
ENSG00000164438	30012	TLX3	protein_coding	HGNC Symbol	1	T cell leukemia homeobox 3 [Source:HGNC Symbol;Acc:HGNC:13532]	5.34421	40.6227
ENSG00000011201	3730	ANOS1	protein_coding	HGNC Symbol	3	anosmin 1 [Source:HGNC Symbol;Acc:HGNC:6211]	5.38735	41.8557
ENSG00000130475	23149	FCHO1	protein_coding	HGNC Symbol	36	FCH and mu domain containing endocytic adaptor 1 [Source:HGNC Symbol;Acc:HGNC:29002]	5.38962	41.9214
ENSG00000095370	10044	SH2D3C	protein_coding	HGNC Symbol	13	SH2 domain containing 3C [Source:HGNC Symbol;Acc:HGNC:16884]	5.39289	42.0167
ENSG00000188910	2707	GJB3	protein_coding	HGNC Symbol	2	gap junction protein beta 3 [Source:HGNC Symbol;Acc:HGNC:4285]	5.4036	42.3296
ENSG00000185352	266722	HS6ST3	protein_coding	HGNC Symbol	2	heparan sulfate 6-O-sulfotransferase 3 [Source:HGNC Symbol;Acc:HGNC:19134]	5.40682	42.4243
ENSG00000266401	NA	AP002478.1	lncRNA	Clone-based (Ensembl) gene	3	novel transcript, antisense to DLGAP1	5.43564	43.2802
ENSG00000160179	9619	ABCG1	protein_coding	HGNC Symbol	11	ATP binding cassette subfamily G member 1 [Source:HGNC Symbol;Acc:HGNC:73]	5.44698	43.6219
ENSG00000269981	NA	AL627309.7	processed_pseudogene	Clone-based (Ensembl) gene	1	novel pseudogene	5.44784	43.6479
ENSG00000078549	117	ADCYAP1R1	protein_coding	HGNC Symbol	7	ADCYAP receptor type I [Source:HGNC Symbol;Acc:HGNC:242]	5.4537	43.8255
ENSG00000067606	5590	PRKCZ	protein_coding	HGNC Symbol	26	protein kinase C zeta [Source:HGNC Symbol;Acc:HGNC:9412]	5.45905	43.9883
ENSG00000110076	9379	NRXN2	protein_coding	HGNC Symbol	15	neurexin 2 [Source:HGNC Symbol;Acc:HGNC:8009]	5.45907	43.9891
ENSG00000123243	80760	ITIH5	protein_coding	HGNC Symbol	9	inter-alpha-trypsin inhibitor heavy chain 5 [Source:HGNC Symbol;Acc:HGNC:21449]	5.47021	44.3301
ENSG00000114646	10675	CSPG5	protein_coding	HGNC Symbol	5	chondroitin sulfate proteoglycan 5 [Source:HGNC Symbol;Acc:HGNC:2467]	5.47358	44.4337
ENSG00000011347	9066	SYT7	protein_coding	HGNC Symbol	10	synaptotagmin 7 [Source:HGNC Symbol;Acc:HGNC:11514]	5.47595	44.5067
ENSG00000214796	NA	AC098934.1	transcribed_unprocessed_pseudogene	Clone-based (Ensembl) gene	4	tubulin, alpha (TUBA) pseudogene	5.49644	45.1434
ENSG00000197471	6693	SPN	protein_coding	HGNC Symbol	6	sialophorin [Source:HGNC Symbol;Acc:HGNC:11249]	5.50226	45.3259
ENSG00000136883	113220	KIF12	protein_coding	HGNC Symbol	9	kinesin family member 12 [Source:HGNC Symbol;Acc:HGNC:21495]	5.50488	45.4081
ENSG00000162892	11009	IL24	protein_coding	HGNC Symbol	7	interleukin 24 [Source:HGNC Symbol;Acc:HGNC:11346]	5.50579	45.4369
ENSG00000263567	NA	AC007923.1	lncRNA	Clone-based (Ensembl) gene	1	novel transcript	5.51337	45.6761
ENSG00000145703	10788	IQGAP2	protein_coding	HGNC Symbol	19	IQ motif containing GTPase activating protein 2 [Source:HGNC Symbol;Acc:HGNC:6111]	5.52146	45.9329
ENSG00000037280	2324	FLT4	protein_coding	HGNC Symbol	12	fms related receptor tyrosine kinase 4 [Source:HGNC Symbol;Acc:HGNC:3767]	5.52552	46.0623
ENSG00000137261	9856	KIAA0319	protein_coding	HGNC Symbol	6	KIAA0319 [Source:HGNC Symbol;Acc:HGNC:21580]	5.53008	46.2083
ENSG00000165238	65268	WNK2	protein_coding	HGNC Symbol	16	WNK lysine deficient protein kinase 2 [Source:HGNC Symbol;Acc:HGNC:14542]	5.53085	46.2329
ENSG00000133134	84707	BEX2	protein_coding	HGNC Symbol	4	brain expressed X-linked 2 [Source:HGNC Symbol;Acc:HGNC:30933]	5.53271	46.2927
ENSG00000135144	1840	DTX1	protein_coding	HGNC Symbol	5	deltex E3 ubiquitin ligase 1 [Source:HGNC Symbol;Acc:HGNC:3060]	5.53343	46.3157
ENSG00000157087	491	ATP2B2	protein_coding	HGNC Symbol	14	ATPase plasma membrane Ca2+ transporting 2 [Source:HGNC Symbol;Acc:HGNC:815]	5.53777	46.4552
ENSG00000010319	56920	SEMA3G	protein_coding	HGNC Symbol	3	semaphorin 3G [Source:HGNC Symbol;Acc:HGNC:30400]	5.5411	46.5625
ENSG00000103316	1428	CRYM	protein_coding	HGNC Symbol	10	crystallin mu [Source:HGNC Symbol;Acc:HGNC:2418]	5.54973	46.842
ENSG00000104833	10382	TUBB4A	protein_coding	HGNC Symbol	13	tubulin beta 4A class IVa [Source:HGNC Symbol;Acc:HGNC:20774]	5.54976	46.843
ENSG00000006047	51087	YBX2	protein_coding	HGNC Symbol	7	Y-box binding protein 2 [Source:HGNC Symbol;Acc:HGNC:17948]	5.55718	47.0844
ENSG00000077522	88	ACTN2	protein_coding	HGNC Symbol	13	actinin alpha 2 [Source:HGNC Symbol;Acc:HGNC:164]	5.56168	47.2315
ENSG00000196972	644596	SMIM10L2B	protein_coding	HGNC Symbol	1	small integral membrane protein 10 like 2B [Source:HGNC Symbol;Acc:HGNC:34500]	5.56768	47.4286
ENSG00000176490	148252	DIRAS1	protein_coding	HGNC Symbol	3	DIRAS family GTPase 1 [Source:HGNC Symbol;Acc:HGNC:19127]	5.56912	47.4758
ENSG00000158457	340348	TSPAN33	protein_coding	HGNC Symbol	4	tetraspanin 33 [Source:HGNC Symbol;Acc:HGNC:28743]	5.57569	47.6925
ENSG00000143502	55061	SUSD4	protein_coding	HGNC Symbol	10	sushi domain containing 4 [Source:HGNC Symbol;Acc:HGNC:25470]	5.57627	47.7115
ENSG00000163377	151647	TAFA4	protein_coding	HGNC Symbol	3	TAFA chemokine like family member 4 [Source:HGNC Symbol;Acc:HGNC:21591]	5.57686	47.7313
ENSG00000212724	730755	KRTAP2-3	protein_coding	HGNC Symbol	1	keratin associated protein 2-3 [Source:HGNC Symbol;Acc:HGNC:18906]	5.58402	47.9687
ENSG00000238266	NA	LINC00707	lncRNA	HGNC Symbol	9	long intergenic non-protein coding RNA 707 [Source:HGNC Symbol;Acc:HGNC:44691]	5.58464	47.9893
ENSG00000140968	3394	IRF8	protein_coding	HGNC Symbol	11	interferon regulatory factor 8 [Source:HGNC Symbol;Acc:HGNC:5358]	5.59025	48.1762
ENSG00000198914	5455	POU3F3	protein_coding	HGNC Symbol	2	POU class 3 homeobox 3 [Source:HGNC Symbol;Acc:HGNC:9216]	5.60853	48.7906
ENSG00000166387	8495	PPFIBP2	protein_coding	HGNC Symbol	27	PPFIA binding protein 2 [Source:HGNC Symbol;Acc:HGNC:9250]	5.61084	48.8686
ENSG00000007171	4843	NOS2	protein_coding	HGNC Symbol	3	nitric oxide synthase 2 [Source:HGNC Symbol;Acc:HGNC:7873]	5.61151	48.8914
ENSG00000167654	85300	ATCAY	protein_coding	HGNC Symbol	6	ATCAY kinesin light chain interacting caytaxin [Source:HGNC Symbol;Acc:HGNC:779]	5.61795	49.1103
ENSG00000188620	340784	HMX3	protein_coding	HGNC Symbol	1	H6 family homeobox 3 [Source:HGNC Symbol;Acc:HGNC:5019]	5.62943	49.5026
ENSG00000138759	80144	FRAS1	protein_coding	HGNC Symbol	7	Fraser extracellular matrix complex subunit 1 [Source:HGNC Symbol;Acc:HGNC:19185]	5.63113	49.561
ENSG00000167244	3481	IGF2	protein_coding	HGNC Symbol	7	insulin like growth factor 2 [Source:HGNC Symbol;Acc:HGNC:5466]	5.63307	49.6276
ENSG00000143195	387597	ILDR2	protein_coding	HGNC Symbol	9	immunoglobulin like domain containing receptor 2 [Source:HGNC Symbol;Acc:HGNC:18131]	5.63607	49.7308
ENSG00000101443	10406	WFDC2	protein_coding	HGNC Symbol	7	WAP four-disulfide core domain 2 [Source:HGNC Symbol;Acc:HGNC:15939]	5.63737	49.7759
ENSG00000012124	933	CD22	protein_coding	HGNC Symbol	34	CD22 molecule [Source:HGNC Symbol;Acc:HGNC:1643]	5.63935	49.8441
ENSG00000168079	286133	SCARA5	protein_coding	HGNC Symbol	4	scavenger receptor class A member 5 [Source:HGNC Symbol;Acc:HGNC:28701]	5.64328	49.9802
ENSG00000258240	NA	AC002351.1	lncRNA	Clone-based (Ensembl) gene	5	novel transcript	5.64866	50.1669
ENSG00000185272	54033	RBM11	protein_coding	HGNC Symbol	6	RNA binding motif protein 11 [Source:HGNC Symbol;Acc:HGNC:9897]	5.67347	51.037
ENSG00000169291	126669	SHE	protein_coding	HGNC Symbol	3	Src homology 2 domain containing E [Source:HGNC Symbol;Acc:HGNC:27004]	5.69412	51.7727
ENSG00000248485	654790	PCP4L1	protein_coding	HGNC Symbol	1	Purkinje cell protein 4 like 1 [Source:HGNC Symbol;Acc:HGNC:20448]	5.71653	52.5833
ENSG00000126259	84063	KIRREL2	protein_coding	HGNC Symbol	5	kirre like nephrin family adhesion molecule 2 [Source:HGNC Symbol;Acc:HGNC:18816]	5.72383	52.8499
ENSG00000151117	144110	TMEM86A	protein_coding	HGNC Symbol	5	transmembrane protein 86A [Source:HGNC Symbol;Acc:HGNC:26890]	5.72529	52.9036
ENSG00000062282	84649	DGAT2	protein_coding	HGNC Symbol	9	diacylglycerol O-acyltransferase 2 [Source:HGNC Symbol;Acc:HGNC:16940]	5.72605	52.9314
ENSG00000182985	23705	CADM1	protein_coding	HGNC Symbol	22	cell adhesion molecule 1 [Source:HGNC Symbol;Acc:HGNC:5951]	5.73145	53.1299
ENSG00000142494	55244	SLC47A1	protein_coding	HGNC Symbol	14	solute carrier family 47 member 1 [Source:HGNC Symbol;Acc:HGNC:25588]	5.73484	53.2547
ENSG00000245954	NA	LINC02273	lncRNA	HGNC Symbol	4	long intergenic non-protein coding RNA 2273 [Source:HGNC Symbol;Acc:HGNC:53188]	5.75274	53.9197
ENSG00000140323	85455	DISP2	protein_coding	HGNC Symbol	4	dispatched RND transporter family member 2 [Source:HGNC Symbol;Acc:HGNC:19712]	5.75369	53.9552
ENSG00000163995	84448	ABLIM2	protein_coding	HGNC Symbol	15	actin binding LIM protein family member 2 [Source:HGNC Symbol;Acc:HGNC:19195]	5.75933	54.1667
ENSG00000186204	66002	CYP4F12	protein_coding	HGNC Symbol	17	cytochrome P450 family 4 subfamily F member 12 [Source:HGNC Symbol;Acc:HGNC:18857]	5.76896	54.5291
ENSG00000225968	392617	ELFN1	protein_coding	HGNC Symbol	2	extracellular leucine rich repeat and fibronectin type III domain containing 1 [Source:HGNC Symbol;Acc:HGNC:33154]	5.76963	54.5548
ENSG00000001561	22875	ENPP4	protein_coding	HGNC Symbol	1	ectonucleotide pyrophosphatase/phosphodiesterase 4 [Source:HGNC Symbol;Acc:HGNC:3359]	5.78009	54.9515
ENSG00000116661	26232	FBXO2	protein_coding	HGNC Symbol	6	F-box protein 2 [Source:HGNC Symbol;Acc:HGNC:13581]	5.78039	54.9631
ENSG00000104140	171177	RHOV	protein_coding	HGNC Symbol	1	ras homolog family member V [Source:HGNC Symbol;Acc:HGNC:18313]	5.78088	54.9818
ENSG00000213344	NA	PCNPP3	processed_pseudogene	HGNC Symbol	1	PEST containing nuclear protein pseudogene 3 [Source:HGNC Symbol;Acc:HGNC:41975]	5.78254	55.0449
ENSG00000197943	5336	PLCG2	protein_coding	HGNC Symbol	17	phospholipase C gamma 2 [Source:HGNC Symbol;Acc:HGNC:9066]	5.78657	55.199
ENSG00000149212	143686	SESN3	protein_coding	HGNC Symbol	6	sestrin 3 [Source:HGNC Symbol;Acc:HGNC:23060]	5.78862	55.2776
ENSG00000175264	8534	CHST1	protein_coding	HGNC Symbol	3	carbohydrate sulfotransferase 1 [Source:HGNC Symbol;Acc:HGNC:1969]	5.80179	55.7843
ENSG00000126752	6756	SSX1	protein_coding	HGNC Symbol	1	SSX family member 1 [Source:HGNC Symbol;Acc:HGNC:11335]	5.80226	55.8026
ENSG00000204882	2843	GPR20	protein_coding	HGNC Symbol	1	G protein-coupled receptor 20 [Source:HGNC Symbol;Acc:HGNC:4475]	5.811	56.1415
ENSG00000180720	1132	CHRM4	protein_coding	HGNC Symbol	1	cholinergic receptor muscarinic 4 [Source:HGNC Symbol;Acc:HGNC:1953]	5.81651	56.3566
ENSG00000186462	4674	NAP1L2	protein_coding	HGNC Symbol	1	nucleosome assembly protein 1 like 2 [Source:HGNC Symbol;Acc:HGNC:7638]	5.81763	56.4002
ENSG00000230882	NA	AC005077.4	processed_pseudogene	Clone-based (Ensembl) gene	1	hypothetical protein LOC285908 (LOC285908) pseudogene	5.83453	57.065
ENSG00000174951	2523	FUT1	protein_coding	HGNC Symbol	7	fucosyltransferase 1 (H blood group) [Source:HGNC Symbol;Acc:HGNC:4012]	5.86117	58.1284
ENSG00000168481	203190	LGI3	protein_coding	HGNC Symbol	5	leucine rich repeat LGI family member 3 [Source:HGNC Symbol;Acc:HGNC:18711]	5.87342	58.6241
ENSG00000130829	1852	DUSP9	protein_coding	HGNC Symbol	3	dual specificity phosphatase 9 [Source:HGNC Symbol;Acc:HGNC:3076]	5.88651	59.1584
ENSG00000167772	51129	ANGPTL4	protein_coding	HGNC Symbol	11	angiopoietin like 4 [Source:HGNC Symbol;Acc:HGNC:16039]	5.88943	59.2781
ENSG00000150893	341640	FREM2	protein_coding	HGNC Symbol	2	FRAS1 related extracellular matrix 2 [Source:HGNC Symbol;Acc:HGNC:25396]	5.88992	59.2983
ENSG00000095203	54566	EPB41L4B	protein_coding	HGNC Symbol	2	erythrocyte membrane protein band 4.1 like 4B [Source:HGNC Symbol;Acc:HGNC:19818]	5.89262	59.4093
ENSG00000182040	124590	USH1G	protein_coding	HGNC Symbol	2	USH1 protein network component sans [Source:HGNC Symbol;Acc:HGNC:16356]	5.89712	59.5951
ENSG00000166396	8710	SERPINB7	protein_coding	HGNC Symbol	7	serpin family B member 7 [Source:HGNC Symbol;Acc:HGNC:13902]	5.89949	59.6932
ENSG00000167434	762	CA4	protein_coding	HGNC Symbol	6	carbonic anhydrase 4 [Source:HGNC Symbol;Acc:HGNC:1375]	5.91741	60.4391
ENSG00000109321	374	AREG	protein_coding	HGNC Symbol	3	amphiregulin [Source:HGNC Symbol;Acc:HGNC:651]	5.91892	60.5024
ENSG00000197106	388662	SLC6A17	protein_coding	HGNC Symbol	2	solute carrier family 6 member 17 [Source:HGNC Symbol;Acc:HGNC:31399]	5.92155	60.6127
ENSG00000140465	1543	CYP1A1	protein_coding	HGNC Symbol	10	cytochrome P450 family 1 subfamily A member 1 [Source:HGNC Symbol;Acc:HGNC:2595]	5.92296	60.672
ENSG00000156466	392255	GDF6	protein_coding	HGNC Symbol	3	growth differentiation factor 6 [Source:HGNC Symbol;Acc:HGNC:4221]	5.92909	60.9305
ENSG00000126878	83543	AIF1L	protein_coding	HGNC Symbol	10	allograft inflammatory factor 1 like [Source:HGNC Symbol;Acc:HGNC:28904]	5.93187	61.0479
ENSG00000121966	7852	CXCR4	protein_coding	HGNC Symbol	3	C-X-C motif chemokine receptor 4 [Source:HGNC Symbol;Acc:HGNC:2561]	5.93308	61.0991
ENSG00000203963	400757	C1orf141	protein_coding	HGNC Symbol	8	chromosome 1 open reading frame 141 [Source:HGNC Symbol;Acc:HGNC:32044]	5.94314	61.5269
ENSG00000103740	23205	ACSBG1	protein_coding	HGNC Symbol	14	acyl-CoA synthetase bubblegum family member 1 [Source:HGNC Symbol;Acc:HGNC:29567]	5.94327	61.5324
ENSG00000245848	1050	CEBPA	protein_coding	HGNC Symbol	1	CCAAT enhancer binding protein alpha [Source:HGNC Symbol;Acc:HGNC:1833]	5.94399	61.5631
ENSG00000187094	885	CCK	protein_coding	HGNC Symbol	4	cholecystokinin [Source:HGNC Symbol;Acc:HGNC:1569]	5.95685	62.1141
ENSG00000189221	4128	MAOA	protein_coding	HGNC Symbol	4	monoamine oxidase A [Source:HGNC Symbol;Acc:HGNC:6833]	5.96089	62.2885
ENSG00000179292	256472	TMEM151A	protein_coding	HGNC Symbol	1	transmembrane protein 151A [Source:HGNC Symbol;Acc:HGNC:28497]	5.96219	62.3447
ENSG00000107518	26033	ATRNL1	protein_coding	HGNC Symbol	11	attractin like 1 [Source:HGNC Symbol;Acc:HGNC:29063]	5.97728	63
ENSG00000162551	249	ALPL	protein_coding	HGNC Symbol	7	alkaline phosphatase, biomineralization associated [Source:HGNC Symbol;Acc:HGNC:438]	5.98726	63.4371
ENSG00000255375	NA	AL078612.3	lncRNA	Clone-based (Ensembl) gene	3	novel transcript	5.99586	63.8165
ENSG00000075673	479	ATP12A	protein_coding	HGNC Symbol	2	ATPase H+/K+ transporting non-gastric alpha2 subunit [Source:HGNC Symbol;Acc:HGNC:13816]	5.99654	63.8469
ENSG00000163395	91156	IGFN1	protein_coding	HGNC Symbol	5	immunoglobulin like and fibronectin type III domain containing 1 [Source:HGNC Symbol;Acc:HGNC:24607]	5.99655	63.8474
ENSG00000118946	27253	PCDH17	protein_coding	HGNC Symbol	4	protocadherin 17 [Source:HGNC Symbol;Acc:HGNC:14267]	6.00694	64.3086
ENSG00000131409	94030	LRRC4B	protein_coding	HGNC Symbol	4	leucine rich repeat containing 4B [Source:HGNC Symbol;Acc:HGNC:25042]	6.01482	64.6607
ENSG00000124507	29993	PACSIN1	protein_coding	HGNC Symbol	7	protein kinase C and casein kinase substrate in neurons 1 [Source:HGNC Symbol;Acc:HGNC:8570]	6.01991	64.8892
ENSG00000167286	915	CD3D	protein_coding	HGNC Symbol	5	CD3d molecule [Source:HGNC Symbol;Acc:HGNC:1673]	6.02086	64.9323
ENSG00000002745	51384	WNT16	protein_coding	HGNC Symbol	2	Wnt family member 16 [Source:HGNC Symbol;Acc:HGNC:16267]	6.0236	65.0558
ENSG00000255408	56145	PCDHA3	protein_coding	HGNC Symbol	2	protocadherin alpha 3 [Source:HGNC Symbol;Acc:HGNC:8669]	6.02783	65.2465
ENSG00000164659	222223	KIAA1324L	protein_coding	HGNC Symbol	12	KIAA1324 like [Source:HGNC Symbol;Acc:HGNC:21945]	6.02934	65.3147
ENSG00000261655	NA	AC100803.3	lncRNA	Clone-based (Ensembl) gene	1	novel transcript, overlapping to GPR20	6.03757	65.6884
ENSG00000164744	256979	SUN3	protein_coding	HGNC Symbol	10	Sad1 and UNC84 domain containing 3 [Source:HGNC Symbol;Acc:HGNC:22429]	6.04026	65.8109
ENSG00000221818	64641	EBF2	protein_coding	HGNC Symbol	4	EBF transcription factor 2 [Source:HGNC Symbol;Acc:HGNC:19090]	6.04261	65.9184
ENSG00000176533	2788	GNG7	protein_coding	HGNC Symbol	2	G protein subunit gamma 7 [Source:HGNC Symbol;Acc:HGNC:4410]	6.0429	65.9315
ENSG00000163623	4825	NKX6-1	protein_coding	HGNC Symbol	2	NK6 homeobox 1 [Source:HGNC Symbol;Acc:HGNC:7839]	6.05322	66.4051
ENSG00000171631	5031	P2RY6	protein_coding	HGNC Symbol	12	pyrimidinergic receptor P2Y6 [Source:HGNC Symbol;Acc:HGNC:8543]	6.05519	66.4957
ENSG00000182175	56963	RGMA	protein_coding	HGNC Symbol	13	repulsive guidance molecule BMP co-receptor a [Source:HGNC Symbol;Acc:HGNC:30308]	6.06181	66.8015
ENSG00000101276	113278	SLC52A3	protein_coding	HGNC Symbol	5	solute carrier family 52 member 3 [Source:HGNC Symbol;Acc:HGNC:16187]	6.0661	67.0003
ENSG00000107859	5309	PITX3	protein_coding	HGNC Symbol	2	paired like homeodomain 3 [Source:HGNC Symbol;Acc:HGNC:9006]	6.06808	67.0924
ENSG00000140807	85407	NKD1	protein_coding	HGNC Symbol	3	NKD inhibitor of WNT signaling pathway 1 [Source:HGNC Symbol;Acc:HGNC:17045]	6.06876	67.1241
ENSG00000140600	6457	SH3GL3	protein_coding	HGNC Symbol	6	SH3 domain containing GRB2 like 3, endophilin A3 [Source:HGNC Symbol;Acc:HGNC:10832]	6.07709	67.5129
ENSG00000198729	81706	PPP1R14C	protein_coding	HGNC Symbol	1	protein phosphatase 1 regulatory inhibitor subunit 14C [Source:HGNC Symbol;Acc:HGNC:14952]	6.09264	68.2444
ENSG00000173432	6288	SAA1	protein_coding	HGNC Symbol	4	serum amyloid A1 [Source:HGNC Symbol;Acc:HGNC:10513]	6.09303	68.263
ENSG00000275216	NA	AL161431.1	lncRNA	Clone-based (Ensembl) gene	2	novel transcript	6.09474	68.3437
ENSG00000113196	9421	HAND1	protein_coding	HGNC Symbol	1	heart and neural crest derivatives expressed 1 [Source:HGNC Symbol;Acc:HGNC:4807]	6.09915	68.5531
ENSG00000069812	54626	HES2	protein_coding	HGNC Symbol	6	hes family bHLH transcription factor 2 [Source:HGNC Symbol;Acc:HGNC:16005]	6.10644	68.9002
ENSG00000136856	29988	SLC2A8	protein_coding	HGNC Symbol	15	solute carrier family 2 member 8 [Source:HGNC Symbol;Acc:HGNC:13812]	6.11209	69.1705
ENSG00000139970	6252	RTN1	protein_coding	HGNC Symbol	9	reticulon 1 [Source:HGNC Symbol;Acc:HGNC:10467]	6.12509	69.7969
ENSG00000090932	10683	DLL3	protein_coding	HGNC Symbol	5	delta like canonical Notch ligand 3 [Source:HGNC Symbol;Acc:HGNC:2909]	6.12682	69.8804
ENSG00000160471	125965	COX6B2	protein_coding	HGNC Symbol	10	cytochrome c oxidase subunit 6B2 [Source:HGNC Symbol;Acc:HGNC:24380]	6.1424	70.6392
ENSG00000198848	1066	CES1	protein_coding	HGNC Symbol	9	carboxylesterase 1 [Source:HGNC Symbol;Acc:HGNC:1863]	6.15012	71.0182
ENSG00000066735	26153	KIF26A	protein_coding	HGNC Symbol	2	kinesin family member 26A [Source:HGNC Symbol;Acc:HGNC:20226]	6.15546	71.2819
ENSG00000235643	NA	LINC01647	lncRNA	HGNC Symbol	1	long intergenic non-protein coding RNA 1647 [Source:HGNC Symbol;Acc:HGNC:52434]	6.16053	71.5324
ENSG00000169548	129025	ZNF280A	protein_coding	HGNC Symbol	1	zinc finger protein 280A [Source:HGNC Symbol;Acc:HGNC:18597]	6.16222	71.6163
ENSG00000183186	126567	C2CD4C	protein_coding	HGNC Symbol	1	C2 calcium dependent domain containing 4C [Source:HGNC Symbol;Acc:HGNC:29417]	6.16677	71.8426
ENSG00000099399	4113	MAGEB2	protein_coding	HGNC Symbol	1	MAGE family member B2 [Source:HGNC Symbol;Acc:HGNC:6809]	6.17247	72.1272
ENSG00000274879	NA	AC009804.1	processed_pseudogene	Clone-based (Ensembl) gene	1	zinc finger protein 717 (ZNF717) pseudogene	6.18673	72.8434
ENSG00000118407	27145	FILIP1	protein_coding	HGNC Symbol	4	filamin A interacting protein 1 [Source:HGNC Symbol;Acc:HGNC:21015]	6.19757	73.3928
ENSG00000169783	84894	LINGO1	protein_coding	HGNC Symbol	14	leucine rich repeat and Ig domain containing 1 [Source:HGNC Symbol;Acc:HGNC:21205]	6.20184	73.6106
ENSG00000171119	4902	NRTN	protein_coding	HGNC Symbol	1	neurturin [Source:HGNC Symbol;Acc:HGNC:8007]	6.20988	74.0218
ENSG00000187957	92737	DNER	protein_coding	HGNC Symbol	2	delta/notch like EGF repeat containing [Source:HGNC Symbol;Acc:HGNC:24456]	6.21415	74.2413
ENSG00000115896	5334	PLCL1	protein_coding	HGNC Symbol	6	phospholipase C like 1 (inactive) [Source:HGNC Symbol;Acc:HGNC:9063]	6.21415	74.2414
ENSG00000183196	4166	CHST6	protein_coding	HGNC Symbol	4	carbohydrate sulfotransferase 6 [Source:HGNC Symbol;Acc:HGNC:6938]	6.22498	74.8007
ENSG00000150627	116966	WDR17	protein_coding	HGNC Symbol	8	WD repeat domain 17 [Source:HGNC Symbol;Acc:HGNC:16661]	6.25653	76.4543
ENSG00000108830	8153	RND2	protein_coding	HGNC Symbol	2	Rho family GTPase 2 [Source:HGNC Symbol;Acc:HGNC:18315]	6.26178	76.7331
ENSG00000135248	84691	FAM71F1	protein_coding	HGNC Symbol	9	family with sequence similarity 71 member F1 [Source:HGNC Symbol;Acc:HGNC:30704]	6.27562	77.473
ENSG00000119547	9480	ONECUT2	protein_coding	HGNC Symbol	2	one cut homeobox 2 [Source:HGNC Symbol;Acc:HGNC:8139]	6.28046	77.7332
ENSG00000152413	9456	HOMER1	protein_coding	HGNC Symbol	5	homer scaffold protein 1 [Source:HGNC Symbol;Acc:HGNC:17512]	6.28226	77.8305
ENSG00000135838	80896	NPL	protein_coding	HGNC Symbol	12	N-acetylneuraminate pyruvate lyase [Source:HGNC Symbol;Acc:HGNC:16781]	6.28957	78.2258
ENSG00000112394	117247	SLC16A10	protein_coding	HGNC Symbol	6	solute carrier family 16 member 10 [Source:HGNC Symbol;Acc:HGNC:17027]	6.28962	78.2284
ENSG00000130558	10439	OLFM1	protein_coding	HGNC Symbol	12	olfactomedin 1 [Source:HGNC Symbol;Acc:HGNC:17187]	6.31251	79.4793
ENSG00000188816	3167	HMX2	protein_coding	HGNC Symbol	1	H6 family homeobox 2 [Source:HGNC Symbol;Acc:HGNC:5018]	6.31402	79.5628
ENSG00000115468	80303	EFHD1	protein_coding	HGNC Symbol	7	EF-hand domain family member D1 [Source:HGNC Symbol;Acc:HGNC:29556]	6.32047	79.9194
ENSG00000166145	6692	SPINT1	protein_coding	HGNC Symbol	11	serine peptidase inhibitor, Kunitz type 1 [Source:HGNC Symbol;Acc:HGNC:11246]	6.33991	81.0035
ENSG00000153291	9481	SLC25A27	protein_coding	HGNC Symbol	8	solute carrier family 25 member 27 [Source:HGNC Symbol;Acc:HGNC:21065]	6.34932	81.5332
ENSG00000168505	2637	GBX2	protein_coding	HGNC Symbol	3	gastrulation brain homeobox 2 [Source:HGNC Symbol;Acc:HGNC:4186]	6.36141	82.2194
ENSG00000175344	1139	CHRNA7	protein_coding	HGNC Symbol	35	cholinergic receptor nicotinic alpha 7 subunit [Source:HGNC Symbol;Acc:HGNC:1960]	6.36316	82.3191
ENSG00000050628	5733	PTGER3	protein_coding	HGNC Symbol	12	prostaglandin E receptor 3 [Source:HGNC Symbol;Acc:HGNC:9595]	6.3728	82.8712
ENSG00000140022	85439	STON2	protein_coding	HGNC Symbol	10	stonin 2 [Source:HGNC Symbol;Acc:HGNC:30652]	6.37435	82.9601
ENSG00000179399	2262	GPC5	protein_coding	HGNC Symbol	4	glypican 5 [Source:HGNC Symbol;Acc:HGNC:4453]	6.37719	83.1236
ENSG00000182459	400629	TEX19	protein_coding	HGNC Symbol	1	testis expressed 19 [Source:HGNC Symbol;Acc:HGNC:33802]	6.37868	83.21
ENSG00000117643	57134	MAN1C1	protein_coding	HGNC Symbol	8	mannosidase alpha class 1C member 1 [Source:HGNC Symbol;Acc:HGNC:19080]	6.37975	83.2716
ENSG00000133863	56154	TEX15	protein_coding	HGNC Symbol	4	testis expressed 15, meiosis and synapsis associated [Source:HGNC Symbol;Acc:HGNC:11738]	6.38919	83.8183
ENSG00000100302	23551	RASD2	protein_coding	HGNC Symbol	1	RASD family member 2 [Source:HGNC Symbol;Acc:HGNC:18229]	6.39584	84.2055
ENSG00000090661	79603	CERS4	protein_coding	HGNC Symbol	16	ceramide synthase 4 [Source:HGNC Symbol;Acc:HGNC:23747]	6.39809	84.3367
ENSG00000142235	114783	LMTK3	protein_coding	HGNC Symbol	8	lemur tyrosine kinase 3 [Source:HGNC Symbol;Acc:HGNC:19295]	6.39864	84.3687
ENSG00000148344	9536	PTGES	protein_coding	HGNC Symbol	2	prostaglandin E synthase [Source:HGNC Symbol;Acc:HGNC:9599]	6.40929	84.9941
ENSG00000205927	10215	OLIG2	protein_coding	HGNC Symbol	3	oligodendrocyte transcription factor 2 [Source:HGNC Symbol;Acc:HGNC:9398]	6.41326	85.2284
ENSG00000061918	2983	GUCY1B1	protein_coding	HGNC Symbol	8	guanylate cyclase 1 soluble subunit beta 1 [Source:HGNC Symbol;Acc:HGNC:4687]	6.42518	85.9352
ENSG00000080854	22997	IGSF9B	protein_coding	HGNC Symbol	7	immunoglobulin superfamily member 9B [Source:HGNC Symbol;Acc:HGNC:32326]	6.43478	86.5093
ENSG00000112796	59084	ENPP5	protein_coding	HGNC Symbol	3	ectonucleotide pyrophosphatase/phosphodiesterase family member 5 [Source:HGNC Symbol;Acc:HGNC:13717]	6.4365	86.6121
ENSG00000128242	9514	GAL3ST1	protein_coding	HGNC Symbol	22	galactose-3-O-sulfotransferase 1 [Source:HGNC Symbol;Acc:HGNC:24240]	6.44076	86.8684
ENSG00000183114	163933	FAM43B	protein_coding	HGNC Symbol	1	family with sequence similarity 43 member B [Source:HGNC Symbol;Acc:HGNC:31791]	6.44269	86.9847
ENSG00000197587	127343	DMBX1	protein_coding	HGNC Symbol	2	diencephalon/mesencephalon homeobox 1 [Source:HGNC Symbol;Acc:HGNC:19026]	6.44729	87.2627
ENSG00000128655	50940	PDE11A	protein_coding	HGNC Symbol	11	phosphodiesterase 11A [Source:HGNC Symbol;Acc:HGNC:8773]	6.45061	87.4636
ENSG00000145824	9547	CXCL14	protein_coding	HGNC Symbol	2	C-X-C motif chemokine ligand 14 [Source:HGNC Symbol;Acc:HGNC:10640]	6.4596	88.0103
ENSG00000177614	79605	PGBD5	protein_coding	HGNC Symbol	3	piggyBac transposable element derived 5 [Source:HGNC Symbol;Acc:HGNC:19405]	6.47235	88.7915
ENSG00000166501	5579	PRKCB	protein_coding	HGNC Symbol	12	protein kinase C beta [Source:HGNC Symbol;Acc:HGNC:9395]	6.50662	90.9257
ENSG00000077274	827	CAPN6	protein_coding	HGNC Symbol	1	calpain 6 [Source:HGNC Symbol;Acc:HGNC:1483]	6.50734	90.971
ENSG00000188338	10991	SLC38A3	protein_coding	HGNC Symbol	9	solute carrier family 38 member 3 [Source:HGNC Symbol;Acc:HGNC:18044]	6.51941	91.7355
ENSG00000069535	4129	MAOB	protein_coding	HGNC Symbol	3	monoamine oxidase B [Source:HGNC Symbol;Acc:HGNC:6834]	6.52033	91.7939
ENSG00000170293	152189	CMTM8	protein_coding	HGNC Symbol	2	CKLF like MARVEL transmembrane domain containing 8 [Source:HGNC Symbol;Acc:HGNC:19179]	6.5274	92.2451
ENSG00000140678	3687	ITGAX	protein_coding	HGNC Symbol	7	integrin subunit alpha X [Source:HGNC Symbol;Acc:HGNC:6152]	6.54679	93.493
ENSG00000125878	6939	TCF15	protein_coding	HGNC Symbol	1	transcription factor 15 [Source:HGNC Symbol;Acc:HGNC:11627]	6.54915	93.6461
ENSG00000239620	100419008	PRR20G	protein_coding	HGNC Symbol	1	proline rich 20G [Source:HGNC Symbol;Acc:HGNC:53837]	6.55791	94.2168
ENSG00000164694	84624	FNDC1	protein_coding	HGNC Symbol	3	fibronectin type III domain containing 1 [Source:HGNC Symbol;Acc:HGNC:21184]	6.59771	96.8518
ENSG00000135547	23493	HEY2	protein_coding	HGNC Symbol	2	hes related family bHLH transcription factor with YRPW motif 2 [Source:HGNC Symbol;Acc:HGNC:4881]	6.60917	97.6245
ENSG00000124882	2069	EREG	protein_coding	HGNC Symbol	3	epiregulin [Source:HGNC Symbol;Acc:HGNC:3443]	6.61356	97.922
ENSG00000078081	27074	LAMP3	protein_coding	HGNC Symbol	5	lysosomal associated membrane protein 3 [Source:HGNC Symbol;Acc:HGNC:14582]	6.62539	98.7283
ENSG00000112379	57221	ARFGEF3	protein_coding	HGNC Symbol	1	ARFGEF family member 3 [Source:HGNC Symbol;Acc:HGNC:21213]	6.62802	98.9082
ENSG00000088992	54997	TESC	protein_coding	HGNC Symbol	8	tescalcin [Source:HGNC Symbol;Acc:HGNC:26065]	6.63306	99.2541
ENSG00000186472	27445	PCLO	protein_coding	HGNC Symbol	9	piccolo presynaptic cytomatrix protein [Source:HGNC Symbol;Acc:HGNC:13406]	6.63436	99.3438
ENSG00000139737	122060	SLAIN1	protein_coding	HGNC Symbol	17	SLAIN motif family member 1 [Source:HGNC Symbol;Acc:HGNC:26387]	6.63952	99.6998
ENSG00000129521	112399	EGLN3	protein_coding	HGNC Symbol	11	egl-9 family hypoxia inducible factor 3 [Source:HGNC Symbol;Acc:HGNC:14661]	6.64044	99.7636
ENSG00000117595	3664	IRF6	protein_coding	HGNC Symbol	5	interferon regulatory factor 6 [Source:HGNC Symbol;Acc:HGNC:6121]	6.64492	100.074
ENSG00000167037	129049	SGSM1	protein_coding	HGNC Symbol	6	small G protein signaling modulator 1 [Source:HGNC Symbol;Acc:HGNC:29410]	6.65076	100.48
ENSG00000167861	283987	HID1	protein_coding	HGNC Symbol	14	HID1 domain containing [Source:HGNC Symbol;Acc:HGNC:15736]	6.6715	101.934
ENSG00000163293	152519	NIPAL1	protein_coding	HGNC Symbol	6	NIPA like domain containing 1 [Source:HGNC Symbol;Acc:HGNC:27194]	6.67542	102.212
ENSG00000185477	285513	GPRIN3	protein_coding	HGNC Symbol	2	GPRIN family member 3 [Source:HGNC Symbol;Acc:HGNC:27733]	6.69136	103.347
ENSG00000178462	79861	TUBAL3	protein_coding	HGNC Symbol	2	tubulin alpha like 3 [Source:HGNC Symbol;Acc:HGNC:23534]	6.6964	103.709
ENSG00000188488	5104	SERPINA5	protein_coding	HGNC Symbol	12	serpin family A member 5 [Source:HGNC Symbol;Acc:HGNC:8723]	6.69699	103.752
ENSG00000173320	56977	STOX2	protein_coding	HGNC Symbol	5	storkhead box 2 [Source:HGNC Symbol;Acc:HGNC:25450]	6.70431	104.279
ENSG00000174607	7368	UGT8	protein_coding	HGNC Symbol	3	UDP glycosyltransferase 8 [Source:HGNC Symbol;Acc:HGNC:12555]	6.70861	104.591
ENSG00000165959	79789	CLMN	protein_coding	HGNC Symbol	9	calmin [Source:HGNC Symbol;Acc:HGNC:19972]	6.71731	105.223
ENSG00000007312	974	CD79B	protein_coding	HGNC Symbol	6	CD79b molecule [Source:HGNC Symbol;Acc:HGNC:1699]	6.7406	106.936
ENSG00000157927	55698	RADIL	protein_coding	HGNC Symbol	7	Rap associating with DIL domain [Source:HGNC Symbol;Acc:HGNC:22226]	6.74877	107.543
ENSG00000196361	1995	ELAVL3	protein_coding	HGNC Symbol	4	ELAV like RNA binding protein 3 [Source:HGNC Symbol;Acc:HGNC:3314]	6.75692	108.153
ENSG00000173805	9001	HAP1	protein_coding	HGNC Symbol	7	huntingtin associated protein 1 [Source:HGNC Symbol;Acc:HGNC:4812]	6.77259	109.333
ENSG00000009950	51085	MLXIPL	protein_coding	HGNC Symbol	11	MLX interacting protein like [Source:HGNC Symbol;Acc:HGNC:12744]	6.78533	110.303
ENSG00000060566	84699	CREB3L3	protein_coding	HGNC Symbol	5	cAMP responsive element binding protein 3 like 3 [Source:HGNC Symbol;Acc:HGNC:18855]	6.80805	112.054
ENSG00000171954	126410	CYP4F22	protein_coding	HGNC Symbol	2	cytochrome P450 family 4 subfamily F member 22 [Source:HGNC Symbol;Acc:HGNC:26820]	6.8129	112.431
ENSG00000133101	8900	CCNA1	protein_coding	HGNC Symbol	4	cyclin A1 [Source:HGNC Symbol;Acc:HGNC:1577]	6.82096	113.062
ENSG00000175175	22843	PPM1E	protein_coding	HGNC Symbol	1	protein phosphatase, Mg2+/Mn2+ dependent 1E [Source:HGNC Symbol;Acc:HGNC:19322]	6.85467	115.734
ENSG00000163531	23114	NFASC	protein_coding	HGNC Symbol	25	neurofascin [Source:HGNC Symbol;Acc:HGNC:29866]	6.86512	116.576
ENSG00000159307	80274	SCUBE1	protein_coding	HGNC Symbol	8	signal peptide, CUB domain and EGF like domain containing 1 [Source:HGNC Symbol;Acc:HGNC:13441]	6.89352	118.893
ENSG00000119919	159296	NKX2-3	protein_coding	HGNC Symbol	2	NK2 homeobox 3 [Source:HGNC Symbol;Acc:HGNC:7836]	6.89712	119.19
ENSG00000179344	3119	HLA-DQB1	protein_coding	HGNC Symbol	9	major histocompatibility complex, class II, DQ beta 1 [Source:HGNC Symbol;Acc:HGNC:4944]	6.91752	120.887
ENSG00000075340	119	ADD2	protein_coding	HGNC Symbol	14	adducin 2 [Source:HGNC Symbol;Acc:HGNC:244]	6.92653	121.645
ENSG00000155265	401647	GOLGA7B	protein_coding	HGNC Symbol	3	golgin A7 family member B [Source:HGNC Symbol;Acc:HGNC:31668]	6.92821	121.786
ENSG00000110324	3587	IL10RA	protein_coding	HGNC Symbol	11	interleukin 10 receptor subunit alpha [Source:HGNC Symbol;Acc:HGNC:5964]	6.94141	122.906
ENSG00000181856	6517	SLC2A4	protein_coding	HGNC Symbol	5	solute carrier family 2 member 4 [Source:HGNC Symbol;Acc:HGNC:11009]	6.94628	123.322
ENSG00000165548	57156	TMEM63C	protein_coding	HGNC Symbol	8	transmembrane protein 63C [Source:HGNC Symbol;Acc:HGNC:23787]	7.05345	132.831
ENSG00000104967	4858	NOVA2	protein_coding	HGNC Symbol	3	NOVA alternative splicing regulator 2 [Source:HGNC Symbol;Acc:HGNC:7887]	7.0578	133.233
ENSG00000101445	26051	PPP1R16B	protein_coding	HGNC Symbol	4	protein phosphatase 1 regulatory subunit 16B [Source:HGNC Symbol;Acc:HGNC:15850]	7.08314	135.593
ENSG00000116544	58512	DLGAP3	protein_coding	HGNC Symbol	3	DLG associated protein 3 [Source:HGNC Symbol;Acc:HGNC:30368]	7.08621	135.882
ENSG00000143333	6004	RGS16	protein_coding	HGNC Symbol	1	regulator of G protein signaling 16 [Source:HGNC Symbol;Acc:HGNC:9997]	7.12574	139.657
ENSG00000124302	64377	CHST8	protein_coding	HGNC Symbol	6	carbohydrate sulfotransferase 8 [Source:HGNC Symbol;Acc:HGNC:15993]	7.13876	140.922
ENSG00000084710	22979	EFR3B	protein_coding	HGNC Symbol	5	EFR3 homolog B [Source:HGNC Symbol;Acc:HGNC:29155]	7.14249	141.288
ENSG00000178538	767	CA8	protein_coding	HGNC Symbol	4	carbonic anhydrase 8 [Source:HGNC Symbol;Acc:HGNC:1382]	7.15866	142.88
ENSG00000196126	3123	HLA-DRB1	protein_coding	HGNC Symbol	1	major histocompatibility complex, class II, DR beta 1 [Source:HGNC Symbol;Acc:HGNC:4948]	7.18879	145.896
ENSG00000175591	5029	P2RY2	protein_coding	HGNC Symbol	3	purinergic receptor P2Y2 [Source:HGNC Symbol;Acc:HGNC:8541]	7.2145	148.518
ENSG00000081277	5317	PKP1	protein_coding	HGNC Symbol	5	plakophilin 1 [Source:HGNC Symbol;Acc:HGNC:9023]	7.2229	149.386
ENSG00000157851	56896	DPYSL5	protein_coding	HGNC Symbol	7	dihydropyrimidinase like 5 [Source:HGNC Symbol;Acc:HGNC:20637]	7.2308	150.206
ENSG00000169860	5028	P2RY1	protein_coding	HGNC Symbol	1	purinergic receptor P2Y1 [Source:HGNC Symbol;Acc:HGNC:8539]	7.24535	151.729
ENSG00000189001	374897	SBSN	protein_coding	HGNC Symbol	3	suprabasin [Source:HGNC Symbol;Acc:HGNC:24950]	7.24875	152.087
ENSG00000253880	NA	AC009435.1	lncRNA	Clone-based (Ensembl) gene	1	novel transcript	7.2991	157.488
ENSG00000144868	66000	TMEM108	protein_coding	HGNC Symbol	11	transmembrane protein 108 [Source:HGNC Symbol;Acc:HGNC:28451]	7.31279	158.99
ENSG00000163273	4880	NPPC	protein_coding	HGNC Symbol	2	natriuretic peptide C [Source:HGNC Symbol;Acc:HGNC:7941]	7.32494	160.334
ENSG00000179111	84667	HES7	protein_coding	HGNC Symbol	3	hes family bHLH transcription factor 7 [Source:HGNC Symbol;Acc:HGNC:15977]	7.3351	161.468
ENSG00000068831	10235	RASGRP2	protein_coding	HGNC Symbol	23	RAS guanyl releasing protein 2 [Source:HGNC Symbol;Acc:HGNC:9879]	7.33985	162
ENSG00000100867	10202	DHRS2	protein_coding	HGNC Symbol	10	dehydrogenase/reductase 2 [Source:HGNC Symbol;Acc:HGNC:18349]	7.35091	163.247
ENSG00000162594	149233	IL23R	protein_coding	HGNC Symbol	5	interleukin 23 receptor [Source:HGNC Symbol;Acc:HGNC:19100]	7.38234	166.842
ENSG00000171236	116844	LRG1	protein_coding	HGNC Symbol	2	leucine rich alpha-2-glycoprotein 1 [Source:HGNC Symbol;Acc:HGNC:29480]	7.39045	167.783
ENSG00000074211	5522	PPP2R2C	protein_coding	HGNC Symbol	9	protein phosphatase 2 regulatory subunit Bgamma [Source:HGNC Symbol;Acc:HGNC:9306]	7.42173	171.46
ENSG00000184515	340542	BEX5	protein_coding	HGNC Symbol	3	brain expressed X-linked 5 [Source:HGNC Symbol;Acc:HGNC:27990]	7.46367	176.517
ENSG00000105409	478	ATP1A3	protein_coding	HGNC Symbol	14	ATPase Na+/K+ transporting subunit alpha 3 [Source:HGNC Symbol;Acc:HGNC:801]	7.47491	177.899
ENSG00000272398	100133941	CD24	protein_coding	HGNC Symbol	8	CD24 molecule [Source:HGNC Symbol;Acc:HGNC:1645]	7.5491	187.287
ENSG00000140459	1583	CYP11A1	protein_coding	HGNC Symbol	10	cytochrome P450 family 11 subfamily A member 1 [Source:HGNC Symbol;Acc:HGNC:2590]	7.56762	189.705
ENSG00000085563	5243	ABCB1	protein_coding	HGNC Symbol	11	ATP binding cassette subfamily B member 1 [Source:HGNC Symbol;Acc:HGNC:40]	7.58213	191.624
ENSG00000102109	27344	PCSK1N	protein_coding	HGNC Symbol	2	proprotein convertase subtilisin/kexin type 1 inhibitor [Source:HGNC Symbol;Acc:HGNC:17301]	7.58414	191.89
ENSG00000119915	83401	ELOVL3	protein_coding	HGNC Symbol	1	ELOVL fatty acid elongase 3 [Source:HGNC Symbol;Acc:HGNC:18047]	7.59158	192.883
ENSG00000144834	29114	TAGLN3	protein_coding	HGNC Symbol	7	transgelin 3 [Source:HGNC Symbol;Acc:HGNC:29868]	7.59366	193.161
ENSG00000117115	11240	PADI2	protein_coding	HGNC Symbol	4	peptidyl arginine deiminase 2 [Source:HGNC Symbol;Acc:HGNC:18341]	7.59499	193.34
ENSG00000128266	2781	GNAZ	protein_coding	HGNC Symbol	3	G protein subunit alpha z [Source:HGNC Symbol;Acc:HGNC:4395]	7.61203	195.636
ENSG00000168280	3800	KIF5C	protein_coding	HGNC Symbol	5	kinesin family member 5C [Source:HGNC Symbol;Acc:HGNC:6325]	7.61234	195.678
ENSG00000171224	219738	FAM241B	protein_coding	HGNC Symbol	3	family with sequence similarity 241 member B [Source:HGNC Symbol;Acc:HGNC:23519]	7.63104	198.231
ENSG00000182759	389692	MAFA	protein_coding	HGNC Symbol	2	MAF bZIP transcription factor A [Source:HGNC Symbol;Acc:HGNC:23145]	7.70188	208.208
ENSG00000143375	57530	CGN	protein_coding	HGNC Symbol	8	cingulin [Source:HGNC Symbol;Acc:HGNC:17429]	7.74406	214.385
ENSG00000184613	4753	NELL2	protein_coding	HGNC Symbol	20	neural EGFL like 2 [Source:HGNC Symbol;Acc:HGNC:7751]	7.74786	214.95
ENSG00000036672	9099	USP2	protein_coding	HGNC Symbol	7	ubiquitin specific peptidase 2 [Source:HGNC Symbol;Acc:HGNC:12618]	7.77203	218.582
ENSG00000164841	157753	TMEM74	protein_coding	HGNC Symbol	2	transmembrane protein 74 [Source:HGNC Symbol;Acc:HGNC:26409]	7.84289	229.585
ENSG00000102195	9248	GPR50	protein_coding	HGNC Symbol	1	G protein-coupled receptor 50 [Source:HGNC Symbol;Acc:HGNC:4506]	7.91105	240.693
ENSG00000187017	83715	ESPN	protein_coding	HGNC Symbol	17	espin [Source:HGNC Symbol;Acc:HGNC:13281]	7.91362	241.122
ENSG00000151224	4143	MAT1A	protein_coding	HGNC Symbol	4	methionine adenosyltransferase 1A [Source:HGNC Symbol;Acc:HGNC:6903]	7.94759	246.867
ENSG00000152192	5457	POU4F1	protein_coding	HGNC Symbol	1	POU class 4 homeobox 1 [Source:HGNC Symbol;Acc:HGNC:9218]	7.99946	255.904
ENSG00000064787	8537	BCAS1	protein_coding	HGNC Symbol	4	breast carcinoma amplified sequence 1 [Source:HGNC Symbol;Acc:HGNC:974]	8.104	275.136
ENSG00000235750	9674	KIAA0040	protein_coding	HGNC Symbol	6	KIAA0040 [Source:HGNC Symbol;Acc:HGNC:28950]	8.10426	275.185
ENSG00000136944	4010	LMX1B	protein_coding	HGNC Symbol	3	LIM homeobox transcription factor 1 beta [Source:HGNC Symbol;Acc:HGNC:6654]	8.12051	278.303
ENSG00000104888	57030	SLC17A7	protein_coding	HGNC Symbol	5	solute carrier family 17 member 7 [Source:HGNC Symbol;Acc:HGNC:16704]	8.12333	278.847
ENSG00000214456	440503	PLIN5	protein_coding	HGNC Symbol	6	perilipin 5 [Source:HGNC Symbol;Acc:HGNC:33196]	8.14505	283.078
ENSG00000174460	170261	ZCCHC12	protein_coding	HGNC Symbol	1	zinc finger CCHC-type containing 12 [Source:HGNC Symbol;Acc:HGNC:27273]	8.17841	289.698
ENSG00000155961	116442	RAB39B	protein_coding	HGNC Symbol	1	RAB39B, member RAS oncogene family [Source:HGNC Symbol;Acc:HGNC:16499]	8.22975	300.194
ENSG00000163909	26508	HEYL	protein_coding	HGNC Symbol	1	hes related family bHLH transcription factor with YRPW motif like [Source:HGNC Symbol;Acc:HGNC:4882]	8.33119	322.06
ENSG00000244791	NA	AC087667.1	lncRNA	Clone-based (Ensembl) gene	3	novel transcript	8.34475	325.103
ENSG00000076864	5909	RAP1GAP	protein_coding	HGNC Symbol	13	RAP1 GTPase activating protein [Source:HGNC Symbol;Acc:HGNC:9858]	8.34606	325.397
ENSG00000160161	148113	CILP2	protein_coding	HGNC Symbol	3	cartilage intermediate layer protein 2 [Source:HGNC Symbol;Acc:HGNC:24213]	8.38513	334.33
ENSG00000074317	6620	SNCB	protein_coding	HGNC Symbol	6	synuclein beta [Source:HGNC Symbol;Acc:HGNC:11140]	8.3896	335.367
ENSG00000229292	729974	RFPL4AL1	protein_coding	HGNC Symbol	1	ret finger protein like 4A like 1 [Source:HGNC Symbol;Acc:HGNC:45147]	8.40055	337.923
ENSG00000198910	3897	L1CAM	protein_coding	HGNC Symbol	16	L1 cell adhesion molecule [Source:HGNC Symbol;Acc:HGNC:6470]	8.43219	345.417
ENSG00000160867	2264	FGFR4	protein_coding	HGNC Symbol	16	fibroblast growth factor receptor 4 [Source:HGNC Symbol;Acc:HGNC:3691]	8.55433	375.933
ENSG00000132026	83546	RTBDN	protein_coding	HGNC Symbol	14	retbindin [Source:HGNC Symbol;Acc:HGNC:30310]	8.58928	385.151
ENSG00000115009	6364	CCL20	protein_coding	HGNC Symbol	5	C-C motif chemokine ligand 20 [Source:HGNC Symbol;Acc:HGNC:10619]	8.61418	391.857
ENSG00000064300	4804	NGFR	protein_coding	HGNC Symbol	3	nerve growth factor receptor [Source:HGNC Symbol;Acc:HGNC:7809]	8.72389	422.818
ENSG00000115457	3485	IGFBP2	protein_coding	HGNC Symbol	5	insulin like growth factor binding protein 2 [Source:HGNC Symbol;Acc:HGNC:5471]	8.96275	498.948
ENSG00000198576	23237	ARC	protein_coding	HGNC Symbol	2	activity regulated cytoskeleton associated protein [Source:HGNC Symbol;Acc:HGNC:648]	9.10811	551.841
ENSG00000223638	342931	RFPL4A	protein_coding	HGNC Symbol	1	ret finger protein like 4A [Source:HGNC Symbol;Acc:HGNC:16449]	9.13603	562.626
ENSG00000129244	482	ATP1B2	protein_coding	HGNC Symbol	3	ATPase Na+/K+ transporting subunit beta 2 [Source:HGNC Symbol;Acc:HGNC:805]	9.32247	640.241
ENSG00000141750	342667	STAC2	protein_coding	HGNC Symbol	2	SH3 and cysteine rich domain 2 [Source:HGNC Symbol;Acc:HGNC:23990]	9.34207	648.997
ENSG00000116983	51440	HPCAL4	protein_coding	HGNC Symbol	3	hippocalcin like 4 [Source:HGNC Symbol;Acc:HGNC:18212]	9.76789	871.822
