# Supplementary material for: Gut microbiota–derived short-chain fatty acids protect against the progression of endometriosis
Source: Life Sci Alliance. 2021 Sep 30;4(12):e202101224. doi: 10.26508/lsa.202101224 (PMC8500332; doi:10.26508/lsa.202101224)
Supplement: Supplementary file 2 [file LSA-2021-01224_TableS2.xlsx]

## Sheet: Table S2
Table S2. List of antibodies and kits
Sr. No.	Antibody	Company, Catalogue number	Application
1	Ki-67	Abcam, ab16667	Immunofluorescence
2	CD31	CST, #77699S	Immunofluorescence
3	F4/80	Thermo Fisher Scientific, 53-4801-82	Immunofluorescence
4	Goat anti-Rabbit IgG (H+L)	Thermo Fisher Scientific, A32731	Immunofluorescence
5	Histone H3 acetylation	Millipore-Sigma, 06-599	Immunoblotting
6	GAPDH	CST, #2118	Immunoblotting
7	Anti-rabbit IgG, HRP-linked	CST, #7074	Immunoblotting
8	Histone H3 Total	CST, #4499	Immunoblotting
9	HDAC1	CST, #34589	Immunoblotting
10	HDAC2	CST, #57156	Immunoblotting
11	HDAC3	CST, #85057	Immunoblotting
12	Active RAP1 Detection kit	CST, #8818	Immunoblotting
