# Supplementary material for: Gut microbiota–derived short-chain fatty acids protect against the progression of endometriosis
Source: Life Sci Alliance. 2021 Sep 30;4(12):e202101224. doi: 10.26508/lsa.202101224 (PMC8500332; doi:10.26508/lsa.202101224)
Supplement: Supplementary file 3 [file LSA-2021-01224_TableS3.xlsx]

## Sheet: Table S3
Table S3. List of TaqMan probes
Sr. No.	Gene name	Species	Application, Chemistry	Company	Cat. No.
1	FFAR2	Human	qPCR, Taqman	ABI	Hs00271142_s1
2	HCAR2	Human	qPCR, Taqman	ABI	Hs02341584_s1
3	RAP1GAP	Human	qPCR, Taqman	ABI	Hs00937963_m1
4	RAP1GAP2	Human	qPCR, Taqman	ABI	Hs00324432_m1
5	RAP1GDS	Human	qPCR, Taqman	ABI	Hs00221760_m1
6	18S	Human Mouse	qPCR, Taqman	ABI	4318839
ABI-applied biosystems.
